# Supplementary material for: The core clock transcription factor TOC1 is a direct regulator of immunity in Arabidopsis
Source: Research Square preprint supplement (doi:10.21203/rs.3.rs-7000350/v1), 2025-07-16
Supplement: Supplementary file 1 [file 90dc8d93c5a6e113481ab9a5.pdf]

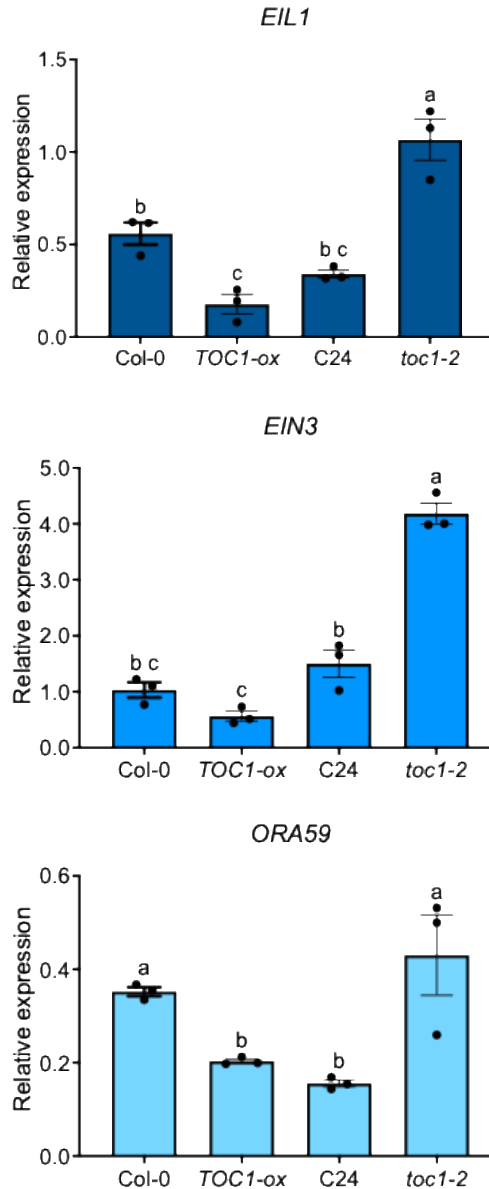

**Figure S1. Quantitative PCR analysis of *EIL1*, *EIN3* and *ORA59* mRNA levels in unchallenged plants mis-expressing *TOC1*.** Leaf tissue was harvested at ZT18 from four-week-old plants grown under a 16 h light and 8h dark cycle. Relative expression of *EIL1*, *EIN3* and *ORA59* was determined by qPCR with normalisation to the geometric mean of *ACTIN2* (AT3G18780) and *MON1* (AT2G28390) expression. Plant genotype had a significant effect on mRNA levels of all three genes (*EIL1*  $F = 31.4$ ,  $p < 0.001$ , partial  $\eta^2 = 0.92$ , *EIN3*  $F = 87.1$ ,  $p < 0.001$ , partial  $\eta^2 = 0.97$  and *ORA59*  $F = 11.2$ ,  $p = 0.003$ , partial  $\eta^2 = 0.81$ ) in one-way ANOVA. Mean expression values with different letters are significantly different ( $p < 0.05$ ) as determined by Fisher LSD post-hoc test. The data presented are mean values  $\pm$  SEM from three biological replicates.

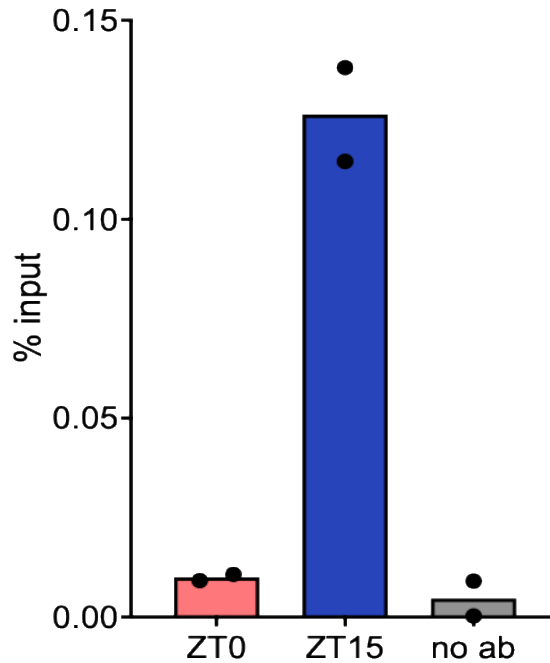

**Figure S2. TOC1 occupies a G-box containing region of the *CCA1* promoter at ZT15.** Two-week old *TMG* seedlings were cross-linked at ZT0 or ZT15 and chromatin immunoprecipitated with an anti-GFP antibody. ChIP-qPCR analysis of TOC1 occupancy of a G-box containing region of the *CCA1* promoter (a known binding site for TOC1) was performed. A no antibody control (no ab) was performed for the ZT15 samples. Values shown are mean percentage input from two independent experiments.

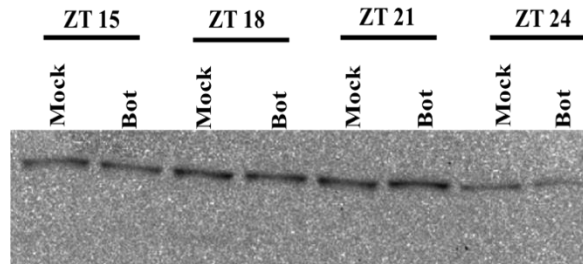

**Figure S3. TOC1 protein levels do not change following *B. cinerea* infection.** Two-week old *TMG* seedlings grown under a 16 h light and 8 h dark cycle were spray-inoculated with *B. cinerea* spore suspension (Bot) or mock-inoculated with half-strength grape juice (Mock) at ZT0. Samples were collected every three hours from ZT15 to ZT24 for extraction of total protein. TOC1-YFP fusion protein was detected using anti-GFP antibody. Protein bands were detected with Enhanced Chemiluminescent (ECL) reagent and visualised using the ChemiDoc™ XRS+ system and Image Lab software (version 5.2). This experiment was repeated twice with similar results.
