# Supplementary material for: The core clock transcription factor TOC1 is a direct regulator of immunity in Arabidopsis
Source: Research Square preprint supplement (doi:10.21203/rs.3.rs-7000350/v1), 2025-07-16
Supplement: Supplementary file 1 [file f17eefd40cb88341a93663ba.xlsx]

## Sheet: Table S1
Table S1. RT-qPCR primers used for gene expression analysis. The annealing temperature used for all primer sets was 60ºC
Gene	AGI	Forward primer sequence	Reverse primer sequence	Primer concentrations (nM)	Amplicon size (bp)
Actin-2	AT3G18780	AGTGGTCGTACAACCGGTATTGT	CATGAGGTAATCAGTAAGGTCACGT	900 F 300 R	138
EIL1	AT2G27050	GTAAGCCTGTGACTGGTGCT	CTGAAGCGTATGCGGTGTTG	300	170
EIN3	AT3G20770	TAACAGTAGCGGCAACAGGTTC	TCTTGCTGCTTCTGCTGCATTC	300	135
ERF4	AT3G15210	GACTCTGATTCGTCATCGGTCG	AGGCCTGTTCCGATGGAGG	400	103
MON1	AT2G28390	CAGACAAGGCGATGGCGATA	GCTTTCTCTCAAGGGTTTCTGGGT	200	244
ORA47	AT1G74930	TTTGATTCCTTCTCCGACGACTTC	CATCTAATAAACTCTCTCCTCCGTAATC	500	100
ORA59	AT1G06160	ACATCTTCTCCTTCTTCCTCC	TCTTGCGTCATAACAACACTCTG	400	98
WRKY33	AT2G38470	ACAAAACATGAATGGTTCTGC	AGAGGAGGAGACAAAAGCA	500	196

## Sheet: Table S2
Table S2. qPCR primers used for ChIP experiments
Gene	AGI	Region	Position	Forward primer sequence	Reverse primer sequence	Primer concentrations (nM)	Annealing temp (ºC)	Amplicon size (bp)
CCA1	AT2G46830	G-box	-292	TGTAGTGAACCGCACGAGAA	CGTTAATCTCTCCCACCAGTTT	500	60	122
ERF4	AT3G15210	G-box	-186	AACGCTTGGTGAGGTTAAA	CTCTTACAAAACACCAGCGG	400	60	138
		Exon	734	GACTCTGATTCGTCATCGGTCG	AGGCCTGTTCCGATGGAGG	400	60	103
ORA47	AT1G74930	G-box	-1295	CAAACGTGCCTAAACAAATAGAG	GAAGTGGCAAGTGAGGAAGAA	300	60	204
		Exon	851	TTTGATTCCTTCTCCGACGACTTC	CATCTAATAAACTCTCTCCTCCGTAATC	500	60	100
ORA59	AT1G06160	G-box	-294	CATCTATTTTGTCGGGAATAC	ATGAGATACACAGAAGTGGGTGA	300	55	93
		Exon	701	ACATCTTCTCCTTCTTCCTCC	TCTTGCGTCATAACAACACTCTG	400	60	98
WRKY33	AT2G38470	G-box	-1365	CGGATCAACAAACACTGCATAG	GCACGATATGTGGTATGGTTCT	500	60	105
		Exon	1407	AGTCTGATTCCTTTGGGATGC	TGCTGACAATCGATGAGCCT	500	60	93

## Sheet: Table S3
Table S3. Genes differentially expressed in unchallenged toc1-2 versus C24 plants. Log2 FC values are given for timepoints (ZT18 or ZT22) when genes were signficantly DE
UPREGULATED GENES					DOWNREGULATED GENES
Gene ID	Gene name	log2 FC 18 ZT18	log2 FC ZT22		Gene ID	Gene name	log2 FC 18 ZT18	log2 FC ZT22
AT1G06160	ORA59	3.02372			AT1G01010	NAC001	-1.07433
AT1G07090	LSH6	1.15435			AT1G02020	-	-0.841207
AT1G07500	-	2.14134			AT1G06980	-	-5.85745
AT1G07570	APK1A	1.13899			AT1G07890	APX1	-0.774833
AT1G07700	-	1.01426			AT1G07985	-	-5.51441
AT1G09250	-	1.00527			AT1G14430	-	-6.8892
AT1G14280	PKS2	2.94486			AT1G30360	ERD4	-0.80712
AT1G15125	-	3.26198			AT1G43620	UGT8-B1	-0.836113
AT1G19400	-	1.84299			AT1G58270	ZW9	-1.5417
AT1G23050	-	1.69599			AT1G59865	-	-6.52142
AT1G23090	AST91	0.939488			AT1G68110	-	-2.94623
AT1G23205	-	2.27167			AT1G71840	-	-0.662466
AT1G27020	-	2.10793			AT1G75830	LCR67	-6.25913
AT1G34210	SERK2	0.940803			AT1G78380	GSTU19	-0.953191
AT1G35830	-	5.85315			AT2G02250	PP2-B2	-6.44041
AT1G43670	FBP	1.272			AT2G02990	RNS1	-2.20725
AT1G58340	ZF14	3.588			AT2G04450	NUDT6	-0.908516
AT1G61740	-	1.49299			AT2G22500	UCP5	-0.988764
AT1G65481	-	5.92544			AT2G30040	MAPKKK14	-1.86332
AT1G68840	RAV2	1.78939			AT2G32130	-	-1.93896
AT1G72030	-	1.08115			AT2G47800	ABCC4	-0.717004
AT1G72490	-	6.83405			AT3G01890	-	-1.25374
AT1G72500	-	1.08098			AT3G05170	-	-2.44968
AT1G72630	ELF4-L2	1.15736			AT3G06435	-	-5.74243
AT1G72940	-	0.871091			AT3G21220	MKK5	-0.751663
AT1G73330	DR4	1.28079			AT3G22550	-	-1.00862
AT1G75100	JAC1	1.17808			AT3G48090	EDS1	-1.12473
AT1G75180	-	1.8812			AT3G53990	-	-1.11416
AT1G75820	CLV1	1.05575			AT3G61450	SYP73	-3.94015
AT1G78460	-	1.20436			AT4G12400	Hop3	-4.491
AT2G07687	-	1.54715			AT4G14690	ELIP2	-1.39264
AT2G21320	BBX18	2.47576			AT4G16146	-	-1.58704
AT2G21330	FBA1	1.54044			AT4G22590	TPPG	-0.915047
AT2G21730	CAD2	6.20417			AT4G38300	-	-2.13651
AT2G22240	MIPS2	2.16589			AT5G15960	KIN1	-3.07263
AT2G24100	ASG1	1.14937			AT5G23240	-	-0.98992
AT2G25480	-	2.26639			AT5G24770	VSP2	-1.41321
AT2G28410	-	3.22194			AT5G50950	FUM2	-2.11175
AT2G29360	-	1.33824			AT5G52640	HSP9-.1	-1.32323
AT2G30760	-	6.45851			AT5G56910	-	-1.38635
AT2G31380	STH	2.63276			AT1G68795	CLE12	-3.00669	-2.21355
AT2G36630	-	1.74704			AT3G05660	RLP33	-2.23073	-2.56512
AT2G37970	SOUL-1	0.767069			AT3G12580	HSP7-	-1.43029	-1.51699
AT2G39705	RTFL8	1.45617			AT3G15350	-	-0.731439	-0.754326
AT2G40900	UMAMIT11	1.80156			AT3G55970	JRG21	-1.47292	-0.951222
AT2G41250	-	2.0061			AT4G04610	36982	-0.767891	-0.939411
AT2G41730	-	1.70161			AT4G19520	-	-2.72907	-2.56387
AT2G42060	-	6.02484			AT4G21990	APR	-0.783754	-1.32566
AT2G42220	-	1.44451			AT4G28550	-	-2.50359	-2.8854
AT2G42740	RPL16A	1.45944			AT4G30640	-	-2.15461	-1.80906
AT2G42900	-	5.85012			AT5G02490	Hsp7--2	-0.928113	-0.896327
AT2G46450	CNGC12	1.10132			AT5G15970	KIN2	-5.09069	-2.59359
AT2G48020	-	1.09943			AT5G37260	RVE2	-1.16837	-1.46911
AT3G02380	COL2	4.22139			AT5G44380	-	-1.63789	-2.8516
AT3G11900	ANT1	0.753729			AT5G55930	OPT1	-1.93021	-2.00097
AT3G15353	MT3	0.903899			AT1G01130	-		-3.09782
AT3G16660	-	2.50039			AT1G01480	ACS2		-2.79461
AT3G17609	HYH	1.85326			AT1G02360	-		-1.23678
AT3G19360	-	1.41427			AT1G02920	GSTF7		-0.97617
AT3G23635	RTFL13	5.84711			AT1G02930	GSTF6		-0.960028
AT3G25717	RTFL16	1.86701			AT1G03495	-		-5.99407
AT3G27170	CLC-B	1.98648			AT1G03940	-		-3.34919
AT3G53420	PIP2A	0.798446			AT1G04635	EMB1687		-2.01636
AT3G57030	-	0.83762			AT1G04980	PDIL2-2		-1.74039
AT3G60910	-	0.91888			AT1G05000	PFA-DSP1		-1.00743
AT3G61580	SLD1	0.988851			AT1G05010	EFE		-1.14836
AT4G00820	iqd17	2.13637			AT1G05620	URH2		-1.13805
AT4G03400	DFL2	0.819869			AT1G05640	-		-1.6486
AT4G04745	-	3.70721			AT1G05700	-		-6.80754
AT4G04830	MSRB5	2.58879			AT1G05710	-		-1.18859
AT4G12390	PME1	1.21598			AT1G06620	-		-0.735224
AT4G12735	-	2.14588			AT1G06830	-		-2.87815
AT4G13885	-	3.52831			AT1G06910	TRFL7		-2.14283
AT4G15430	-	1.90546			AT1G07960	PDIL5-1		-0.934239
AT4G18250	-	1.05328			AT1G08640	CJD1		-0.83989
AT4G19850	PP2-A2	6.52036			AT1G09210	CRT1b		-1.00474
AT4G25050	ACP4	1.57595			AT1G09240	NAS3		-2.29288
AT4G26415	-	6.76481			AT1G10585	-		-1.75498
AT4G30230	-	2.0266			AT1G10650	-		-1.51704
AT4G34730	-	0.864579			AT1G11190	BFN1		-6.36363
AT4G36230	-	4.62175			AT1G11330	-		-1.28665
AT4G38840	-	2.08319			AT1G11580	PMEPCRA		-1.01277
AT4G38960	BBX19	1.25499			AT1G12110	NRT1.1		-1.6779
AT5G04190	PKS4	4.2984			AT1G12710	PP2-A12		-1.32512
AT5G05790	-	1.54626			AT1G13520	-		-6.75498
AT5G07280	EMS1	6.08632			AT1G14540	PER4		-2.5564
AT5G15850	COL1	0.88308			AT1G14720	XTH28		-0.655228
AT5G15950	-	1.82784			AT1G15270	-		-0.606528
AT5G17390	-	5.53309			AT1G16510	-		-1.00867
AT5G17670	-	1.39302			AT1G17090	-		-1.95432
AT5G19880	-	2.46634			AT1G17170	GSTU24		-1.7377
AT5G20180	-	1.17339			AT1G17180	GSTU25		-8.2328
AT5G22300	NIT4	2.06735			AT1G17490	-		-0.963111
AT5G22555	-	4.78132			AT1G18070	-		-0.564989
AT5G23020	IMS2	0.808448			AT1G18370	HIK		-1.66351
AT5G23060	CaS	1.62201			AT1G19610	PDF1.4		-1.70916
AT5G23460	-	0.795159			AT1G20310	-		-2.3633
AT5G24120	SIGE	1.53641			AT1G20590	-		-6.07626
AT5G35480	-	1.5797			AT1G21210	WAK4		-5.816
AT5G39530	-	1.21458			AT1G21750	PDIL1-1		-0.888162
AT5G40990	GLIP1	7.89978			AT1G23030	-		-0.931552
AT5G46100	-	4.50032			AT1G23800	ALDH2B7		-1.09185
AT5G51110	-	1.0045			AT1G24170	LGT9		-1.42033
AT5G57890	-	1.19244			AT1G24530	-		-1.05273
AT5G58070	TIL	0.955859			AT1G26380	-		-1.40767
AT5G60490	FLA12	6.76932			AT1G27070	-		-1.1095
AT5G64170	-	4.33534			AT1G27330	-		-0.642796
AT5G64840	ABCF5	1.02948			AT1G27350	-		-0.940301
AT5G64940	ATH13	0.95512			AT1G27760	SAT32		-0.782027
AT1G02340	HFR1	4.79277	3.03563		AT1G28600	-		-0.580702
AT1G06040	STO	3.83603	1.79625		AT1G28660	-		-1.38116
AT1G07180	NDA1	1.75761	0.930976		AT1G29030	-		-1.0099
AT1G09575	-	2.48389	5.29168		AT1G29090	-		-2.31853
AT1G13245	RTFL17	1.52795	0.710663		AT1G29290	-		-1.04279
AT1G13260	RAV1	0.700536	0.708685		AT1G29860	WRKY71		-2.11275
AT1G13700	PGL1	1.30327	1.28818		AT1G30700	-		-2.84841
AT1G18330	EPR1	4.26714	2.46284		AT1G30730	-		-3.81596
AT1G21050	-	1.89699	1.35382		AT1G31817	NFD3		-1.50969
AT1G21830	-	0.930015	0.994495		AT1G31850	-		-0.758368
AT1G29910	CAB3	2.73138	2.46226		AT1G32330	HSFA1D		-0.937955
AT1G29920	CAB2	1.83166	2.00873		AT1G35350	-		-1.51768
AT1G29930	CAB1	2.30024	2.40476		AT1G36280	-		-0.696108
AT1G31330	PSAF	1.24068	1.39066		AT1G36390	-		-1.04959
AT1G32540	LOL1	1.69288	2.16509		AT1G36622	-		-2.12618
AT1G44446	CH1	2.10278	0.823057		AT1G43860	-		-0.884127
AT1G44575	NPQ4	1.31067	0.999793		AT1G43910	-		-1.45631
AT1G52220	-	1.13235	0.769708		AT1G45688	-		-0.808713
AT1G52230	PSAH2	1.40065	0.791465		AT1G47890	RLP7		-1.71043
AT1G61520	LHCA3	1.70441	1.78138		AT1G51790	-		-1.26502
AT1G66130	-	1.64555	1.13908		AT1G51800	IOS1		-1.81965
AT1G67740	PSBY	1.40026	1.09887		AT1G51850	-		-2.97356
AT1G69830	AMY3	1.92832	1.99511		AT1G52360	-		-0.776891
AT1G71030	MYBL2	3.37859	3.58107		AT1G53500	MUM4		-0.954631
AT1G73470	-	1.57439	1.55593		AT1G53680	GSTU28		-5.99819
AT1G73480	-	2.4879	2.97635		AT1G55205	-		-3.40055
AT1G74090	SOT18	1.04003	0.653919		AT1G55210	-		-0.828518
AT1G74470	-	1.30337	1.11443		AT1G55490	CPN6-B		-0.961023
AT2G03730	ACR5	2.26165	1.47429		AT1G55810	UKL3		-0.819238
AT2G05070	LHCB2.2	4.49285	3.53776		AT1G56080	-		-3.65504
AT2G05100	LHCB2.1	4.47419	3.38649		AT1G56340	CRT1a		-0.98347
AT2G05620	PGR5	1.19988	0.605732		AT1G57560	MYB5-		-1.57559
AT2G21660	GRP7	0.87687	0.851589		AT1G60620	RPAC43		-1.40703
AT2G21960	-	0.940997	0.861096		AT1G60890	-		-1.05969
AT2G22980	SCPL13	2.40214	1.85151		AT1G61120	TPS-4		-2.48647
AT2G26800	-	0.97247	0.589669		AT1G61640	-		-1.87452
AT2G26975	COPT6	0.783721	0.611977		AT1G61667	-		-1.20036
AT2G29650	PHT4;1	3.5501	2.00542		AT1G61800	GPT2		-3.03816
AT2G34420	LHB1B2	1.32962	2.43955		AT1G61820	BGLU46		-6.07346
AT2G36120	DOT1	1.09513	0.981715		AT1G62180	37347		-0.818521
AT2G36145	-	1.64367	0.980725		AT1G62780	-		-0.995826
AT2G36900	MEMB11	0.672806	0.889661		AT1G63220	-		-1.53747
AT2G37170	PIP2B	1.41907	1.4764		AT1G64220	TOM7-2		-3.56077
AT2G43010	PIF4	3.46209	3.03184		AT1G64780	AMT1;2		-2.53206
AT3G01060	-	2.60462	0.929161		AT1G65730	YSL7		-1.47978
AT3G08940	LHCB4.2	1.59033	1.64715		AT1G66070	-		-0.908225
AT3G12320	-	3.76216	1.85496		AT1G68440	-		-1.14615
AT3G16800	-	1.16185	2.02029		AT1G68600	-		-1.1382
AT3G27690	LHCB2.3	2.48403	3.72997		AT1G69070	-		-1.07878
AT3G28860	ABCB19	1.50147	1.68411		AT1G69380	RRG		-1.22381
AT3G47470	LHCA4	1.50772	1.62392		AT1G69520	-		-1.37682
AT3G47500	CDF3	5.28686	2.19007		AT1G69760	-		-1.82519
AT3G50740	UGT72E1	1.15519	1.03501		AT1G69920	GSTU12		-1.94047
AT3G50750	BEH1	1.13101	1.22873		AT1G70000	-		-1.35061
AT3G54500	-	3.17975	1.01335		AT1G70090	LGT8		-1.22453
AT3G55240	-	10.0962	3.72075		AT1G70140	FH8		-1.0449
AT3G56500	-	2.76747	4.69052		AT1G71220	EBS1		-0.838835
AT3G58490	SPP1	1.41714	0.716113		AT1G71360	-		-1.33513
AT3G59060	PIL6	1.74304	1.35013		AT1G71400	RLP12		-1.58315
AT4G12800	PSAL	1.69633	1.52585		AT1G71850	-		-1.08336
AT4G13010	-	1.20608	0.770037		AT1G72510	-		-0.599009
AT4G16780	HB-2	1.2815	1.18139		AT1G74010	-		-1.85438
AT4G22190	-	0.862057	1.44171		AT1G74020	SS2		-0.895813
AT4G27310	BBX28	3.60519	2.80892		AT1G75270	DHAR2		-0.818554
AT4G36670	PMT6	2.02141	1.52852		AT1G75450	CKX5		-2.0391
AT4G37650	SHR	0.805307	0.596039		AT1G75780	TUB1		-1.59145
AT5G02810	PRR7	2.39748	2.88397		AT1G75840	ARAC5		-1.12885
AT5G05690	CPD	0.911683	1.11889		AT1G77510	PDIL1-2		-0.906295
AT5G06980	-	5.28277	2.04786		AT1G77810	-		-1.08418
AT5G13090	-	1.02711	0.911066		AT1G77990	AST56		-1.41616
AT5G13630	GUN5	1.84886	1.17278		AT1G78950	BAS		-6.29742
AT5G13740	ZIF1	1.29486	0.828077		AT1G79400	CHX2		-2.25089
AT5G14570	NRT2.7	1.1074	0.888968		AT1G80270	PPR596		-1.33395
AT5G16030	-	2.72885	1.5079		AT1G80280	-		-1.82446
AT5G16810	-	1.86063	0.996115		AT1G80950	-		-0.804614
AT5G20380	PHT4;5	0.65666	0.840015		AT2G01910	ATMAP65-6		-1.19296
AT5G22090	-	0.833322	0.746362		AT2G02730	-		-1.96087
AT5G24300	SS1	1.73297	1.04612		AT2G03850	-		-3.25603
AT5G39660	CDF2	3.92317	1.03217		AT2G04030	CR88		-0.715096
AT5G41761	-	4.01127	2.59789		AT2G15490	UGT73B4		-7.18124
AT5G43860	CLH2	1.33786	1.48814		AT2G15780	-		-2.3974
AT5G52900	MAKR6	1.08176	1.53158		AT2G16640	TOC132		-0.742353
AT5G54270	LHCB3	2.05803	1.50485		AT2G17740	-		-3.94945
AT5G57660	COL5	3.92912	2.09843		AT2G17972	-		-1.13573
AT5G58540	-	1.70067	2.08905		AT2G18160	bZIP2		-0.644278
AT5G60850	OBP4	0.998767	1.05726		AT2G18740	-		-0.856604
AT5G64180	-	1.15508	1.71579		AT2G18860	-		-0.951505
AT5G67030	ABA1	1.27228	0.823332		AT2G18950	HPT1		-1.07486
AT1G01180	-		0.846308		AT2G19190	FRK1		-1.59001
AT1G01240	-		0.918299		AT2G19280	-		-1.98491
AT1G01500	-		0.923101		AT2G19450	TAG1		-0.970412
AT1G01720	ATAF1		0.878259		AT2G20690	-		-0.639436
AT1G02110	-		0.85374		AT2G23430	ICK1		-1.03813
AT1G02350	-		1.70976		AT2G23560	MES7		-3.60718
AT1G03130	PSAD-2		1.57935		AT2G23790	-		-1.50682
AT1G03140	-		0.754147		AT2G24850	TAT3		-1.1836
AT1G03400	-		0.724125		AT2G25000	WRKY6-		-0.811424
AT1G03610	-		2.07629		AT2G25620	DBP1		-0.929492
AT1G04140	-		0.54178		AT2G25710	HCS1		-0.961476
AT1G04310	ERS2		1.28944		AT2G26930	CDPMEK		-1.07864
AT1G04400	CRY2		0.659922		AT2G28520	VHA-A1		-0.627388
AT1G05805	-		0.917019		AT2G29100	GLR2.9		-6.22171
AT1G05840	-		0.796204		AT2G29350	SAG13		-1.08652
AT1G05890	ARI5		0.632279		AT2G29470	GSTU3		-1.7797
AT1G06060	-		0.72951		AT2G29490	GSTU1		-7.0692
AT1G06110	SKIP16		0.671151		AT2G29500	-		-2.99052
AT1G06460	ACD32.1		1.06747		AT2G29560	ENOC		-0.909855
AT1G06680	PSBP-1		1.22202		AT2G30490	C4H		-1.09967
AT1G06970	CHX14		5.89239		AT2G30720	-		-0.955694
AT1G07080	-		0.803507		AT2G31070	TCP1-		-0.692053
AT1G07250	UGT71C4		1.09771		AT2G31240	-		-1.16506
AT1G07310	-		0.626077		AT2G31945	-		-7.41785
AT1G07985	-		2.42263		AT2G32280	-		-1.33178
AT1G08380	PSAO		1.25433		AT2G32530	CSLB-3		-1.30914
AT1G08460	HDA-8		0.828946		AT2G33020	RLP24		-2.34327
AT1G08570	ACHT4		0.786937		AT2G33210	HSP6--2		-1.18441
AT1G08980	AMI1		1.11196		AT2G33730	-		-0.672756
AT1G09010	-		0.835722		AT2G34660	ABCC2		-0.703335
AT1G09100	RPT5B		0.835467		AT2G34790	MEE23		-1.60192
AT1G09280	-		0.826923		AT2G35140	-		-6.79927
AT1G09490	-		1.17298		AT2G36950	-		-1.32073
AT1G09520	-		0.713329		AT2G36970	-		-0.877279
AT1G09570	PHYA		1.1552		AT2G38250	-		-3.57143
AT1G09910	-		0.813719		AT2G38570	-		-2.64995
AT1G10090	-		0.664179		AT2G38870	-		-1.94557
AT1G10170	NFXL1		0.903031		AT2G39200	MLO12		-2.08622
AT1G10210	MPK1		1.08738		AT2G39518	-		-3.11171
AT1G10470	ARR4		1.09448		AT2G39530	-		-7.10688
AT1G10810	-		4.30922		AT2G41110	CAM2		-0.876242
AT1G11210	-		1.8659		AT2G41380	-		-1.1317
AT1G11260	STP1		1.22232		AT2G41450	-		-3.36206
AT1G11480	-		0.695812		AT2G42540	COR15A		-3.62095
AT1G11650	RBP45B		0.580779		AT2G42900	-		-6.42549
AT1G12090	ELP		1.25517		AT2G43510	TI1		-1.30641
AT1G12440	-		0.700146		AT2G44370	-		-3.23429
AT1G12760	-		0.648483		AT2G44450	BGLU15		-2.16033
AT1G12910	ATAN11		0.818796		AT2G44500	-		-1.08162
AT1G12990	-		0.697281		AT2G45360	-		-6.70382
AT1G13210	ACA.l		0.583288		AT2G45440	DHDPS2		-0.731721
AT1G13450	GT-1		0.823565		AT2G45520	-		-0.888541
AT1G13820	-		0.718408		AT2G45680	TCP9		-0.964223
AT1G13930	-		0.951786		AT2G46390	SDH8		-0.807404
AT1G14030	LSMT-L		0.900311		AT2G46700	CRK3		-0.940825
AT1G14400	UBC1		0.7554		AT2G47470	UNE5		-0.801697
AT1G14570	-		0.547744		AT3G01800	-		-0.982186
AT1G14910	-		0.82651		AT3G02490	-		-1.04227
AT1G14920	GAI		0.803548		AT3G02570	MEE31		-1.04038
AT1G15170	-		0.739645		AT3G02910	-		-0.879108
AT1G15220	CCMH		0.830792		AT3G03650	EDA5		-5.81724
AT1G15350	-		0.738743		AT3G04220	-		-2.31005
AT1G15530	-		0.975741		AT3G04550	-		-0.713704
AT1G15740	-		1.04297		AT3G04980	-		-2.75875
AT1G15820	LHCB6		1.31853		AT3G05320	-		-1.94682
AT1G16150	WAKL4		1.10359		AT3G05360	RLP3-		-1.46527
AT1G16240	SYP51		0.836123		AT3G05400	-		-3.09406
AT1G17147	-		2.30816		AT3G05650	RLP32		-0.90044
AT1G17160	-		0.878889		AT3G06700	-		-0.769286
AT1G17210	ILP1		0.649234		AT3G06860	MFP2		-0.717062
AT1G17290	AlaAT1		0.642164		AT3G07610	IBM1		-1.1518
AT1G17530	TIM23-1		0.999359		AT3G07770	Hsp89.1		-0.931559
AT1G18570	MYB51		0.860744		AT3G09270	GSTU8		-1.77619
AT1G19000	-		0.622834		AT3G09405	-		-1.36643
AT1G19310	-		0.96436		AT3G09440	-		-0.841398
AT1G19770	PUP14		0.795928		AT3G09520	EXO7-H4		-2.02351
AT1G20190	EXPA11		1.0733		AT3G11480	BSMT1		-6.39396
AT1G20510	OPCL1		0.907626		AT3G12560	TRFL9		-0.681581
AT1G20620	CAT3		1.95842		AT3G13790	ATBFRUCT1		-1.54426
AT1G20693	HMGB2		0.596063		AT3G13940	-		-0.77222
AT1G21065	-		0.583944		AT3G14172	-		-1.47662
AT1G21130	IGMT4		1.49506		AT3G14720	MPK19		-0.841044
AT1G21313	-		1.56525		AT3G14810	MSL5		-0.924297
AT1G21326	-		2.71643		AT3G14870	-		-1.7424
AT1G21450	SCL1		0.891689		AT3G16530	-		-2.18165
AT1G21760	FBP7		0.938919		AT3G16860	COBL8		-1.61814
AT1G21920	-		1.53688		AT3G17360	POK1		-3.01476
AT1G22270	-		0.615721		AT3G17780	-		-0.845748
AT1G22500	ATL15		1.35212		AT3G18110	EMB127-		-1.22764
AT1G22540	-		0.907759		AT3G18240	-		-1.76841
AT1G22710	SUC2		1.05197		AT3G18610	NUC-L2		-3.98012
AT1G22990	HIPP22		7.10796		AT3G19130	RBP47B		-0.737761
AT1G23390	-		1.96618		AT3G19370	-		-1.43363
AT1G23840	-		1.53318		AT3G19450	ATCAD4		-0.794667
AT1G23850	-		0.684778		AT3G19970	-		-1.54727
AT1G23860	RSZ21		0.959185		AT3G20510	-		-0.810537
AT1G24440	-		1.18496		AT3G20640	-		-2.8466
AT1G25560	TEM1		0.676218		AT3G20870	-		-0.741878
AT1G26800	-		2.33979		AT3G21351	-		-3.2279
AT1G27090	-		0.588722		AT3G21500	DXPS1		-3.86897
AT1G27650	ATU2AF35A		0.765692		AT3G21700	SGP2		-1.24469
AT1G28070	-		1.44831		AT3G22060	-		-1.16602
AT1G28100	-		1.77583		AT3G22231	PCC1		-1.53242
AT1G28260	-		0.893966		AT3G22235	-		-1.77435
AT1G28330	DYL1		1.12216		AT3G22930	CML11		-1.50609
AT1G28960	NUDX15		1.00363		AT3G23410	FAO3		-1.46824
AT1G29465	-		0.693815		AT3G23530	-		-1.37315
AT1G30200	-		0.738584		AT3G23790	AAE16		-1.79539
AT1G31820	PUT1		0.869326		AT3G24420	-		-1.52777
AT1G32790	CID11		0.600783		AT3G24982	RLP4-		-1.13788
AT1G33560	ADR1		0.628839		AT3G25130	-		-2.25056
AT1G33680	-		0.801998		AT3G25230	ROF1		-1.12862
AT1G33990	MES14		0.795532		AT3G25870	-		-1.16794
AT1G34180	NAC-16		1.13807		AT3G25882	NIMIN-2		-0.987535
AT1G35580	CINV1		0.713854		AT3G26670	-		-1.17421
AT1G35710	-		0.808071		AT3G27380	SDH2-1		-0.73657
AT1G36730	-		0.568129		AT3G27540	-		-1.47788
AT1G36980	-		0.599184		AT3G28210	PMZ		-3.5031
AT1G43700	VIP1		0.570097		AT3G28580	-		-1.48332
AT1G44770	-		0.56114		AT3G28740	CYP81D11		-5.22766
AT1G45976	SBP1		0.93296		AT3G29250	SDR4		-2.14558
AT1G47056	VFB1		0.744373		AT3G29590	AT5MAT		-6.74878
AT1G48490	-		0.658323		AT3G29810	COBL2		-1.80551
AT1G48620	HON5		0.677738		AT3G32980	-		-6.14625
AT1G48840	-		1.13297		AT3G45240	GRIK1		-0.671938
AT1G49032	-		0.570526		AT3G45440	-		-5.61427
AT1G49050	-		1.00527		AT3G45970	EXLA1		-1.84324
AT1G49170	-		1.32616		AT3G46280	-		-2.07028
AT1G49500	-		2.52965		AT3G46430	-		-0.645982
AT1G50480	THFS		0.807147		AT3G46660	UGT76E12		-5.76526
AT1G51360	DABB1		0.904911		AT3G47830	-		-2.62753
AT1G51400	-		1.26494		AT3G47960	GTR1		-0.820586
AT1G51500	ABCG12		0.735669		AT3G48520	CYP94B3		-4.1592
AT1G51550	-		1.11581		AT3G48580	XTH11		-2.84526
AT1G52740	HTA9		0.635934		AT3G48850	PHT3;2		-1.84434
AT1G52800	-		1.24055		AT3G49990	-		-0.83099
AT1G53170	ERF8		1.29767		AT3G50360	CEN2		-1.04356
AT1G53320	TLP7		0.726776		AT3G50900	-		-0.941866
AT1G53580	GLY3		0.890481		AT3G51800	ATG2		-0.787044
AT1G54040	ESP		0.817913		AT3G52380	CP33		-0.770975
AT1G55530	-		0.676422		AT3G53260	PAL2		-0.792038
AT1G55590	-		0.750398		AT3G53480	ABCG37		-2.48536
AT1G55670	PSAG		1.38048		AT3G54420	EP3		-0.976897
AT1G55673	-		2.77146		AT3G55280	RPL23AB		-0.759939
AT1G56220	-		1.0656		AT3G55340	PHIP1		-1.11114
AT1G56540	-		3.05487		AT3G55660	ROPGEF6		-7.06371
AT1G56550	RGXT3		1.29458		AT3G56090	FER3		-0.991139
AT1G59580	MPK2		0.619221		AT3G56200	-		-0.817828
AT1G59870	PEN3		1.06459		AT3G57460	-		-2.49681
AT1G59900	E1 ALPHA		0.555328		AT3G57465	-		-3.91328
AT1G60420	-		0.640058		AT3G57520	SIP2		-0.997524
AT1G60470	GolS4		4.147		AT3G57770	-		-1.9121
AT1G61250	SC3		0.594417		AT3G58840	PMD1		-0.974026
AT1G61500	-		1.33104		AT3G59570	-		-1.20229
AT1G61620	-		0.687931		AT3G60440	-		-1.04647
AT1G63740	-		1.08635		AT3G61190	BAP1		-1.06738
AT1G63800	UBC5		1.07114		AT3G61760	DL1B		-4.00575
AT1G64280	NPR1		0.620898		AT3G62050	-		-2.75274
AT1G64710	-		1.19822		AT3G62450	-		-1.07493
AT1G64740	TUA1		0.740926		AT3G62530	-		-1.44265
AT1G65260	PTAC4		0.640966		AT3G62600	ATERDJ3B		-1.05477
AT1G65580	FRA3		0.867354		AT4G00860	ATOZI1		-0.688784
AT1G65790	RK1		0.8258		AT4G00960	-		-0.764322
AT1G66680	AR4-1		0.660379		AT4G01080	TBL26		-2.51332
AT1G66900	-		0.764281		AT4G02940	-		-1.00834
AT1G67330	-		0.717492		AT4G03180	-		-1.13771
AT1G67530	-		0.896824		AT4G04710	CPK22		-3.6009
AT1G67870	-		0.959769		AT4G05390	RFNR1		-1.02169
AT1G67910	-		1.02327		AT4G08230	-		-0.843777
AT1G68530	KCS6		0.693747		AT4G08390	SAPX		-0.805655
AT1G68670	-		0.579819		AT4G09970	-		-0.981362
AT1G69010	BIM2		0.750542		AT4G10040	CYTC-2		-0.831897
AT1G69270	RPK1		0.755609		AT4G10120	ATSPS4F		-1.79626
AT1G69530	EXPA1		2.15099		AT4G10360	-		-0.687145
AT1G69840	-		0.696462		AT4G10600	-		-6.29689
AT1G70150	-		0.67819		AT4G11175	-		-0.827767
AT1G70160	-		0.710413		AT4G11450	-		-2.30538
AT1G70290	TPS8		1.93186		AT4G12680	-		-1.83326
AT1G70830	MLP28		1.44778		AT4G12830	-		-1.89202
AT1G71020	-		1.05353		AT4G14090	-		-3.19854
AT1G71480	-		0.806393		AT4G14240	-		-0.819617
AT1G71970	-		0.881116		AT4G14640	CAM8		-2.8928
AT1G71980	-		0.611098		AT4G15610	-		-1.33878
AT1G72010	-		0.628429		AT4G15640	-		-1.11429
AT1G72150	PATL1		1.08419		AT4G15800	RALFL33		-0.835263
AT1G73250	GER1		0.861401		AT4G15802	HSBP		-0.685589
AT1G73500	MKK9		0.614318		AT4G16350	CBL6		-5.90719
AT1G73750	-		1.85708		AT4G16660	-		-0.78569
AT1G73810	-		1.48151		AT4G16730	TPS-2		-8.493
AT1G74100	SOT16		0.673634		AT4G17090	CT-BMY		-2.24532
AT1G74840	-		1.09758		AT4G17490	ERF6		-1.82303
AT1G74920	ALDH1-A8		0.69379		AT4G17670	-		-1.41131
AT1G74940	-		0.888386		AT4G17800	-		-6.89908
AT1G75460	-		0.93314		AT4G17880	MYC4		-0.740909
AT1G75490	-		1.77025		AT4G18010	IP5PII		-0.847002
AT1G75660	XRN3		0.530569		AT4G20170	GALS3		-1.28897
AT1G75830	LCR67		5.21978		AT4G20300	-		-0.809906
AT1G76100	PETE1		0.846323		AT4G20325	-		-3.67429
AT1G76490	HMG1		0.860513		AT4G20860	-		-1.51535
AT1G76860	LSM3B		0.552976		AT4G20970	-		-2.4486
AT1G77000	SKP2B		1.25696		AT4G22470	-		-1.52181
AT1G77210	STP14		1.46578		AT4G23140	CRK6		-0.952718
AT1G78140	-		0.583239		AT4G23250	EMB129-		-0.814881
AT1G78700	BEH4		1.12684		AT4G24110	-		-5.99296
AT1G78820	-		1.18983		AT4G25120	SRS2		-3.82043
AT1G78830	-		0.769378		AT4G26950	-		-1.44825
AT1G79040	PSBR		1.20821		AT4G28940	-		-6.29968
AT1G79190	-		0.916721		AT4G29520	-		-1.6381
AT1G80180	0		0.926463		AT4G30350	-		-0.850608
AT1G80310	MOT2		0.736597		AT4G30620	-		-1.10156
AT1G80440	-		3.27123		AT4G31000	-		-1.91943
AT1G80460	NHO1		0.690923		AT4G31400	CTF7		-1.68136
AT1G80920	J8		1.77971		AT4G31800	WRKY18		-1.22147
AT2G01021	-		3.16147		AT4G31970	CYP82C2		-6.944
AT2G01100	-		0.890219		AT4G32560	-		-1.44588
AT2G01170	BAT1		0.652677		AT4G33950	OST1		-0.88512
AT2G01320	ABCG7		0.584998		AT4G34050	CCoAOMT1		-0.610871
AT2G01505	CLE16		1.18446		AT4G34590	GBF6		-1.65564
AT2G01930	BPC1		1.1868		AT4G34610	BLH6		-1.21058
AT2G02760	UBC2		0.908058		AT4G34950	-		-1.81055
AT2G02930	GSTF3		1.96609		AT4G35320	-		-1.34007
AT2G03310	-		0.81449		AT4G35570	HMGB5		-0.825111
AT2G03330	-		0.700753		AT4G35590	RKD5		-6.07055
AT2G03440	NRP1		0.908176		AT4G35640	SERAT3;2		-3.50215
AT2G03710	SEP4		0.956694		AT4G35783	RTFL6		-4.78903
AT2G06050	OPR3		0.666432		AT4G36430	-		-2.62705
AT2G07000	-		3.28972		AT4G36640	-		-0.89397
AT2G15830	-		0.718276		AT4G37295	-		-1.50426
AT2G15960	-		1.74208		AT4G37430	CYP91A2		-2.20508
AT2G16720	MYB7		1.12192		AT4G37530	-		-0.947231
AT2G16800	-		0.618658		AT4G37670	NAGS2		-1.49035
AT2G16930	-		0.594917		AT4G37990	ELI3-2		-2.20534
AT2G17200	DSK2		0.523235		AT4G39150	-		-0.751026
AT2G17450	RHA3A		0.823433		AT4G39210	APL3		-1.72671
AT2G17520	IRE1A		0.726208		AT4G39230	-		-0.834417
AT2G18050	HIS1-3		1.64616		AT4G39840	-		-1.01725
AT2G18280	TLP2		0.590314		AT4G39880	-		-0.921195
AT2G18670	-		0.982118		AT5G01340	mSFC1		-0.950187
AT2G18700	TPS11		2.14441		AT5G01540	LECRKA4.1		-0.846968
AT2G18710	SCY1		0.691687		AT5G01720	-		-0.645352
AT2G19130	-		1.12342		AT5G01810	CIPK15		-0.66604
AT2G20210	-		1.26665		AT5G02270	ABCI2-		-0.962719
AT2G20230	-		0.553605		AT5G02430	-		-2.86458
AT2G20260	PSAE-2		1.37417		AT5G02590	-		-1.39254
AT2G20670	-		1.9569		AT5G02780	GSTL1		-1.85126
AT2G21185	-		0.885824		AT5G03160	P58IPK		-1.48117
AT2G21240	BPC4		0.867963		AT5G03650	SBE2.2		-0.861254
AT2G21500	-		1.03274		AT5G03905	-		-1.08864
AT2G22330	CYP79B3		1.36201		AT5G05340	PRX52		-1.62144
AT2G22540	SVP		0.759143		AT5G06530	ABCG22		-0.727514
AT2G22660	-		1.13786		AT5G07320	APC3		-0.878426
AT2G23320	WRKY15		1.21515		AT5G09800	-		-1.62159
AT2G23840	-		1.05644		AT5G09870	CESA5		-0.97113
AT2G24270	ALDH11A3		0.763945		AT5G10010	-		-1.23656
AT2G24790	COL3		0.671086		AT5G10020	-		-1.27461
AT2G25080	GPX1		0.887238		AT5G10770	-		-0.726992
AT2G25200	-		2.81353		AT5G11520	ASP3		-0.659677
AT2G25900	ATCTH		2.67388		AT5G11930	-		-1.47185
AT2G25970	-		0.961267		AT5G12340	-		-5.4997
AT2G26190	-		1.119		AT5G12420	-		-2.17818
AT2G26250	KCS1-		0.78928		AT5G13330	Rap2.6L		-1.24837
AT2G26430	RCY1		0.905451		AT5G13490	AAC2		-0.952714
AT2G26560	PLA2A		1.09503		AT5G13750	ZIFL1		-0.918922
AT2G26740	SEH		0.666968		AT5G16190	CSLA11		-4.0594
AT2G27050	EIL1		0.838986		AT5G17220	GSTF12		-2.70701
AT2G27830	-		1.46518		AT5G18270	ANAC-87		-1.99085
AT2G28630	KCS12		1.68765		AT5G18950	-		-1.15659
AT2G28720	-		1.06806		AT5G19160	TBL11		-4.35804
AT2G28840	XBAT31		0.875598		AT5G20360	Phox3		-1.18074
AT2G29020	-		0.621816		AT5G20790	-		-1.43008
AT2G29170	-		3.09064		AT5G21105	-		-0.900761
AT2G29300	-		3.51373		AT5G22300	NIT4		-1.07674
AT2G29310	-		1.58853		AT5G22880	HTB2		-0.877867
AT2G29320	-		0.781911		AT5G24150	SQP1		-2.42647
AT2G30570	PSBW		1.26422		AT5G24350	-		-0.844054
AT2G30620	-		0.596633		AT5G24810	-		-0.677831
AT2G30860	GSTF9		0.820242		AT5G24990	-		-2.84374
AT2G30950	VAR2		0.794515		AT5G25140	CYP71B13		-1.28873
AT2G32880	-		2.02233		AT5G25450	-		-1.14062
AT2G33340	MAC3B		0.684029		AT5G25510	-		-0.703499
AT2G33410	-		0.563731		AT5G26220	-		-3.20277
AT2G33610	SWI3B		0.815594		AT5G26860	LON1		-0.814543
AT2G33630	-		0.5695		AT5G27395	-		-1.6368
AT2G33830	-		2.08067		AT5G28540	BIP1		-0.992275
AT2G34460	-		0.645113		AT5G35620	LSP1		-0.833885
AT2G35470	-		0.66658		AT5G36880	ACS		-0.621615
AT2G35965	-		2.86465		AT5G40450	-		-1.05287
AT2G36050	OFP15		1.52529		AT5G40590	-		-7.06994
AT2G36220	-		1.40671		AT5G41080	GDPD2		-2.35175
AT2G37340	RS2Z33		0.753155		AT5G41790	CIP1		-0.838974
AT2G37410	TIM17-2		0.762244		AT5G41880	POLA3		-1.15764
AT2G37870	-		1.32308		AT5G42020	BIP2		-1.36604
AT2G38000	-		0.996958		AT5G42150	-		-0.771602
AT2G38050	DET2		0.808611		AT5G42380	CML37		-1.88936
AT2G38560	TFIIS		0.885778		AT5G42760	-		-2.77179
AT2G38790	-		1.06836		AT5G43380	TOPP6		-1.04677
AT2G39000	-		0.527673		AT5G43580	UPI		-4.70564
AT2G39850	-		1.81274		AT5G44390	-		-2.17211
AT2G40970	MYBC1		1.05697		AT5G44635	MCM6		-2.86354
AT2G41410	-		1.04708		AT5G44650	CEST		-0.773052
AT2G41430	ERD15		0.725798		AT5G45720	-		-3.55263
AT2G41710	-		1.15934		AT5G45810	CIPK19		-6.94144
AT2G41760	-		1.75774		AT5G46560	-		-1.27907
AT2G42620	MAX2		1.20466		AT5G47880	ERF1-1		-0.711608
AT2G42690	-		0.695934		AT5G48030	GFA2		-0.635808
AT2G42890	ML2		1.10937		AT5G48870	SAD1		-0.772012
AT2G43140	-		2.0895		AT5G49480	CP1		-1.37396
AT2G43160	-		0.651598		AT5G49520	WRKY48		-2.08246
AT2G43680	IQD14		0.863755		AT5G49680	-		-1.20393
AT2G43750	OASB		0.642896		AT5G50460	-		-0.954998
AT2G44130	-		1.44162		AT5G51460	ATTPPA		-2.51977
AT2G44900	ARABIDILLO-1		0.651219		AT5G52070	-		-1.1708
AT2G45170	ATG8E		0.951436		AT5G52882	-		-1.68407
AT2G45620	-		0.722251		AT5G53420	-		-1.10305
AT2G45980	ATI1		0.993689		AT5G53430	SDG29		-1.15318
AT2G46220	-		1.33829		AT5G53880	-		-1.29989
AT2G46260	LRB1		0.824271		AT5G54130	-		-1.91118
AT2G46550	-		0.921392		AT5G55050	-		-1.05334
AT2G46600	-		1.02422		AT5G55570	-		-1.27369
AT2G46910	-		0.596402		AT5G55920	OLI2		-1.30843
AT2G47060	PTI1-4		0.766015		AT5G56220	-		-3.67166
AT2G47130	SDR3		0.705349		AT5G56710	-		-0.81718
AT2G47400	CP12-1		0.696393		AT5G56795	MT1B		-4.23925
AT2G47450	CAO		0.741002		AT5G56840	-		-2.85769
AT2G47870	-		2.5282		AT5G57010	-		-3.43084
AT2G47890	-		0.972689		AT5G57015	ckl12		-0.69558
AT3G01310	-		0.857437		AT5G58710	ROC7		-0.780874
AT3G01560	-		0.727271		AT5G59850	-		-0.936103
AT3G02020	AK3		1.43838		AT5G61000	RPA7-D		-1.44836
AT3G02540	RAD23C		0.765889		AT5G61240	-		-1.00837
AT3G03150	-		0.589528		AT5G61310	-		-1.26496
AT3G03330	-		0.531163		AT5G61570	-		-1.55743
AT3G03870	-		0.886773		AT5G61790	CNX1		-1.15021
AT3G03880	-		1.05545		AT5G62140	-		-1.11676
AT3G04350	-		0.800738		AT5G62440	-		-1.10193
AT3G04560	-		0.841993		AT5G63220	-		-0.865602
AT3G04730	IAA16		0.544485		AT5G63600	FLS5		-2.4575
AT3G04880	DRT1-2		0.838376		AT5G64120	-		-2.32625
AT3G04930	-		0.840533		AT5G65270	RABA4a		-0.776353
AT3G05200	ATL6		0.820864		AT5G65310	HB5		-0.782666
AT3G05640	-		1.67044		AT5G65320	-		-4.22952
AT3G06210	-		0.905402		AT5G65470	-		-0.823346
AT3G06340	-		0.603593		AT5G65630	GTE7		-0.758747
AT3G06470	-		0.846442		AT5G65930	ZWI		-1.00555
AT3G06590	-		0.676211		AT5G66760	SDH1-1		-0.91308
AT3G06780	-		0.745321		AT5G67470	FH6		-0.658066
AT3G07220	FHA2		0.661897		ATCG00160	RPS2		-1.18287
AT3G07310	-		0.731983		ATCG00180	RPOC1		-1.05425
AT3G07350	-		3.51069		ATCG00190	RPOB		-0.938148
AT3G08030	-		1.13435		ATCG00360	YCF3		-0.674001
AT3G08760	ATSIK		0.882283		ATCG00760	RPL36		-1.49827
AT3G08920	-		0.669641		ATCG01120	RPS15		-1.66552
AT3G09000	-		1.19214		ATCG01130	YCF1.2		-1.46819
AT3G09020	-		1.33456
AT3G09030	-		0.808729
AT3G09840	CDC48		0.690846
AT3G10020	-		2.7872
AT3G10770	-		0.75895
AT3G11770	-		0.924196
AT3G11930	-		1.03682
AT3G12080	emb2738		0.587208
AT3G12120	FAD2		0.786261
AT3G12300	BUG22		0.787478
AT3G12360	ITN1		1.10377
AT3G12490	CYSB		0.600162
AT3G12630	SAP5		0.545887
AT3G12915	-		0.862755
AT3G13062	-		0.947293
AT3G13200	EMB2769		0.703787
AT3G13910	-		0.577164
AT3G14310	PME3		0.883481
AT3G14595	-		1.19242
AT3G14660	CYP72A13		0.724661
AT3G14750	-		0.855938
AT3G15210	ERF4		0.912793
AT3G15450	-		2.90535
AT3G15570	-		1.43775
AT3G15580	APG8H		0.574507
AT3G16520	UGT88A1		1.26952
AT3G16770	EBP		0.917555
AT3G17100	-		1.22126
AT3G17410	-		0.720519
AT3G18080	BGLU44		0.811154
AT3G18170	-		0.950556
AT3G18690	MKS1		0.718276
AT3G19910	-		0.786891
AT3G20770	EIN3		0.916628
AT3G20800	-		0.612718
AT3G21330	-		3.31219
AT3G21350	MED6		0.893758
AT3G21600	-		1.45661
AT3G22440	-		0.746552
AT3G22960	PKP-ALPHA		0.72255
AT3G23080	-		0.8316
AT3G23150	ETR2		1.64163
AT3G23640	HGL1		0.840884
AT3G24120	-		0.607297
AT3G25770	AOC2		0.732255
AT3G26220	CYP71B3		0.865472
AT3G26230	CYP71B24		1.38192
AT3G26430	-		1.68437
AT3G26510	-		1.03629
AT3G26740	CCL		2.34611
AT3G29035	NAC3		3.00917
AT3G43850	-		6.55324
AT3G44610	-		1.62937
AT3G44720	ADT4		0.705808
AT3G45730	-		0.97451
AT3G45780	PHOT1		0.981411
AT3G45980	HTB9		0.662574
AT3G46510	PUB13		0.596443
AT3G47000	-		0.869743
AT3G47160	-		1.37507
AT3G47250	-		0.732456
AT3G47820	PUB39		0.733232
AT3G48410	-		1.3879
AT3G48530	KING1		0.986609
AT3G48590	NF-YC1		0.656401
AT3G48680	GAMMA CAL2		0.547126
AT3G48690	CXE12		1.04159
AT3G48740	SWEET11		1.08408
AT3G48990	AAE3		0.828226
AT3G49370	-		1.6784
AT3G49590	ATG13		0.761564
AT3G49790	-		1.85388
AT3G50260	CEJ1		1.16366
AT3G50500	SNRK2.2		0.687337
AT3G50820	PSBO2		0.916827
AT3G51510	-		0.871682
AT3G52060	-		1.0194
AT3G52070	-		1.40498
AT3G52155	-		0.737704
AT3G52400	SYP122		1.1473
AT3G52570	-		0.923569
AT3G53030	SRPK4		0.877982
AT3G53540	TRM19		0.827158
AT3G55580	-		2.38437
AT3G55770	WLIM2b		0.918408
AT3G56050	-		0.679054
AT3G56710	SIB1		1.21839
AT3G56940	CRD1		0.813522
AT3G57050	CBL		0.597871
AT3G58470	-		0.767742
AT3G58500	PP2A-4		0.737581
AT3G59940	-		2.13987
AT3G60190	DL1E		0.85085
AT3G60520	-		0.90227
AT3G60590	-		0.693933
AT3G60600	VAP27-1		0.535258
AT3G61260	-		0.807742
AT3G61430	PIP1A		0.828473
AT3G61460	BRH1		1.1307
AT3G61470	LHCA2		1.88848
AT3G61630	CRF6		1.14689
AT3G62090	PIL2		2.0469
AT3G62290	ARFA1E		0.649798
AT3G62550	-		2.7367
AT3G62650	-		1.14091
AT3G62660	GATL7		0.857644
AT3G62770	AtATG18a		0.814738
AT3G62780	-		1.30353
AT3G63220	-		0.762965
AT3G63270	-		0.655815
AT4G00231	MEE5-		0.727439
AT4G00355	ATI2		0.659373
AT4G01120	GBF2		1.0986
AT4G01330	-		0.623745
AT4G02360	-		1.40452
AT4G02380	SAG21		1.41757
AT4G02880	-		0.785408
AT4G03030	-		0.846779
AT4G03510	RMA1		1.27133
AT4G03560	TPC1		0.879379
AT4G04630	-		1.29451
AT4G04925	-		0.692042
AT4G05070	-		2.16319
AT4G05150	-		1.46445
AT4G05180	PSBQ-2		1.35663
AT4G08330	-		0.967728
AT4G08470	MEKK3		0.630913
AT4G08920	CRY1		0.555566
AT4G09830	-		0.567418
AT4G10100	CNX7		0.773451
AT4G10610	CID12		0.721679
AT4G11300	-		0.82662
AT4G12570	UPL5		1.13334
AT4G12710	-		1.16468
AT4G13830	J2-		0.853325
AT4G14270	-		2.37064
AT4G14340	CKI1		0.761158
AT4G14440	HCD1		0.940698
AT4G14550	IAA14		2.53892
AT4G14900	-		0.824351
AT4G15490	UGT84A3		0.84063
AT4G15520	-		0.643538
AT4G15760	MO1		1.01463
AT4G16130	ARA1		0.721672
AT4G16150	-		0.680369
AT4G16190	-		1.04537
AT4G16330	-		1.03527
AT4G16480	INT4		1.31527
AT4G17230	SCL13		0.797569
AT4G17245	-		1.14322
AT4G17250	-		0.871975
AT4G17900	-		0.995622
AT4G17950	-		0.813442
AT4G18670	-		1.91489
AT4G18870	-		5.79857
AT4G18930	-		0.682785
AT4G19170	NCED4		2.5506
AT4G19200	-		0.591219
AT4G19390	-		0.7436
AT4G19860	-		0.793244
AT4G19925	-		5.91911
AT4G21380	RK3		1.06456
AT4G21560	VPS28-1		0.57415
AT4G21650	-		1.59727
AT4G21810	DER2.1		0.791603
AT4G22745	MBD1		0.775501
AT4G23330	-		0.728401
AT4G23530	-		0.771337
AT4G23870	-		2.74268
AT4G23880	-		1.12972
AT4G23890	NdhS		1.07921
AT4G24370	-		0.714022
AT4G24390	AFB4		0.798581
AT4G24630	-		0.733022
AT4G24800	ECIP1		1.79933
AT4G25300	-		0.981228
AT4G25470	CBF2		5.3869
AT4G25500	RS4-		0.843538
AT4G25570	ACYB-2		0.603098
AT4G25970	PSD3		0.893643
AT4G26070	MEK1		0.74408
AT4G26130	-		0.815831
AT4G26400	-		0.740427
AT4G26620	-		0.923285
AT4G27000	ATRBP45C		0.555886
AT4G27260	WES1		2.25933
AT4G27320	PHOS34		0.837389
AT4G27450	-		2.60514
AT4G27470	RMA3		1.11265
AT4G27800	TAP38		0.775379
AT4G27990	YLMG1-2		0.608705
AT4G28220	NDB1		1.15393
AT4G28240	-		1.25721
AT4G28300	-		0.819566
AT4G28750	PSAE-1		1.02344
AT4G28755	-		2.3311
AT4G28830	-		0.748974
AT4G29190	OZF2		1.22778
AT4G30210	ATR2		0.657462
AT4G30310	-		0.832385
AT4G30450	-		1.03101
AT4G30550	GGP3		0.982755
AT4G31500	CYP83B1		0.583956
AT4G31510	-		0.745492
AT4G32200	ASY2		1.17825
AT4G32260	PDE334		0.829438
AT4G32340	-		1.81248
AT4G32460	-		0.809204
AT4G32680	-		0.754489
AT4G32760	-		0.739786
AT4G32910	-		0.840478
AT4G32960	-		0.79142
AT4G33666	-		1.65179
AT4G33670	-		0.961993
AT4G33925	SSN2		1.76673
AT4G34412	-		0.692962
AT4G34540	-		0.685622
AT4G34980	SLP2		1.07667
AT4G35000	APX3		0.72945
AT4G35790	PLDDELTA		0.626186
AT4G36040	J11		1.4373
AT4G36900	RAP2.1-		1.12156
AT4G37300	MEE59		1.12232
AT4G37470	KAI2		0.816382
AT4G37550	-		1.48708
AT4G37690	-		0.928611
AT4G37980	ELI3-1		1.50227
AT4G38090	-		0.75981
AT4G38225	-		0.637308
AT4G38460	GGR		0.597718
AT4G38495	-		0.76802
AT4G38550	-		0.591528
AT4G38580	FP6		1.13394
AT4G38690	-		1.20004
AT4G39090	RD19		0.953037
AT4G39640	GGT1		0.884548
AT4G39890	RABH1c		1.18316
AT5G01020	-		0.691734
AT5G01160	-		0.67908
AT5G01530	LHCB4.1		1.1208
AT5G01750	-		1.13593
AT5G01880	-		1.30563
AT5G01980	-		0.709735
AT5G01990	-		1.09857
AT5G02020	SIS		3.7859
AT5G02030	RPL		1.01316
AT5G02290	NAK		0.677501
AT5G03170	FLA11		2.16758
AT5G03240	UBQ3		1.03044
AT5G03470	ATB ALPHA		1.08205
AT5G03490	-		0.958597
AT5G04040	SDP1		0.855777
AT5G04230	PAL3		1.14467
AT5G04490	VTE5		0.739473
AT5G04720	ADR1-L2		0.892494
AT5G04910	-		0.729632
AT5G05090	-		1.20062
AT5G05100	-		0.882473
AT5G05320	-		1.0398
AT5G05750	-		0.980043
AT5G05800	-		0.712888
AT5G05960	-		1.08133
AT5G06370	-		0.871309
AT5G06450	-		0.662306
AT5G07000	ST2B		1.58853
AT5G07010	ST2A		1.85305
AT5G08240	-		1.99719
AT5G08790	ATAF2		0.86468
AT5G09290	-		0.770847
AT5G09570	-		1.54846
AT5G10280	MYB92		3.99202
AT5G10380	RING1		0.829836
AT5G10540	-		0.865707
AT5G10600	CYP81K2		1.14295
AT5G10860	CBSX3		1.07461
AT5G11580	-		0.646876
AT5G12050	-		2.54792
AT5G12840	NF-YA1		0.630455
AT5G13010	EMB3-11		0.63209
AT5G13190	GILP		0.629157
AT5G13860	ELC-Like		0.703288
AT5G14170	CHC1		0.656586
AT5G14240	-		0.668296
AT5G14390	-		0.63677
AT5G14540	-		0.545436
AT5G16110	-		0.898184
AT5G16120	-		1.02304
AT5G16370	AAE5		0.929073
AT5G16470	-		0.685015
AT5G18050	SAUR22		2.84594
AT5G18100	CSD3		0.752237
AT5G18110	NCBP		0.699851
AT5G18170	GDH1		1.3952
AT5G18210	-		0.659026
AT5G18260	-		0.789621
AT5G18350	-		2.00804
AT5G18490	-		0.711855
AT5G18600	-		2.46449
AT5G19080	LUL3		1.07076
AT5G19120	-		2.19857
AT5G19200	TSC1-B		1.08342
AT5G19250	-		0.68463
AT5G19860	-		0.615126
AT5G19930	-		0.9879
AT5G19940	-		0.728903
AT5G20520	WAV2		0.702754
AT5G20950	-		0.706595
AT5G21170	AKINBETA1		1.46281
AT5G21940	-		0.90216
AT5G22000	RHF2A		0.742414
AT5G22270	-		1.20236
AT5G22290	NAC-89		1.39198
AT5G22310	-		3.74379
AT5G22390	-		2.1599
AT5G22630	ADT5		0.949787
AT5G22920	-		1.61151
AT5G23340	-		0.768179
AT5G23380	-		0.730111
AT5G23660	SWEET12		0.891263
AT5G23670	LCB2		0.751609
AT5G24520	TTG1		0.859925
AT5G25190	ESE3		2.17007
AT5G25210	-		1.22392
AT5G25250	FLOT1		0.765024
AT5G25280	-		1.07446
AT5G25350	EBF2		1.02459
AT5G25900	GA3		0.92104
AT5G26920	CBP6-G		1.03154
AT5G27280	-		0.944884
AT5G27420	CNI1		1.02389
AT5G28450	-		1.33395
AT5G32440	-		0.62541
AT5G33210	SRS8		3.21572
AT5G37720	ALY4		0.67659
AT5G39020	-		0.937152
AT5G39600	-		0.633918
AT5G41700	UBC8		0.626923
AT5G42440	-		0.807204
AT5G43100	-		0.677088
AT5G43190	-		0.648523
AT5G43440	-		2.07099
AT5G43930	-		0.742418
AT5G43940	HOT5		0.522898
AT5G44190	GLK2		0.642169
AT5G44210	ERF9		2.41704
AT5G44260	-		2.45202
AT5G45040	CYTC6A		0.799024
AT5G45360	-		0.639834
AT5G46330	FLS2		0.815209
AT5G47370	HAT2		1.30684
AT5G47830	-		0.83749
AT5G48150	PAT1		0.691659
AT5G48160	OBE2		1.13508
AT5G48810	CB5-D		0.521615
AT5G49555	-		0.945813
AT5G49660	XIP1		0.69874
AT5G49730	FRO6		2.40288
AT5G51180	-		0.771885
AT5G51680	-		1.84523
AT5G52570	BETA-OHASE 2		1.78778
AT5G52890	-		1.14033
AT5G52910	ATIM		1.94102
AT5G53300	UBC1-		0.714109
AT5G54190	PORA		6.00206
AT5G54470	BBX29		2.77793
AT5G54490	PBP1		2.42325
AT5G54540	-		0.622037
AT5G54640	RAT5		0.673625
AT5G54680	ILR3		0.690307
AT5G54810	TSB1		0.757767
AT5G55140	-		0.635444
AT5G55190	RAN3		0.545817
AT5G55460	-		1.23957
AT5G57020	NMT1		0.717219
AT5G57220	CYP81F2		2.13526
AT5G57350	HA3		0.706563
AT5G58040	FIP1[V]		0.882321
AT5G58220	TTL		0.779232
AT5G58575	-		0.694315
AT5G59250	-		0.752038
AT5G59420	ORP3C		0.513632
AT5G59440	ZEU1		0.78432
AT5G59680	-		0.887381
AT5G59890	ADF4		0.584008
AT5G59950	-		0.549046
AT5G60230	SEN2		1.19653
AT5G60680	-		2.05678
AT5G60700	-		0.868996
AT5G61210	SNAP33		0.612029
AT5G61250	GUS1		0.689579
AT5G61530	-		0.675648
AT5G62020	HSFB2A		0.861285
AT5G62280	-		4.09055
AT5G62560	-		0.892002
AT5G62630	HIPL2		1.24074
AT5G63160	BT1		2.45258
AT5G63190	-		1.03862
AT5G63470	NF-YC4		1.33397
AT5G63610	CDKE;1		0.73142
AT5G63620	-		0.694186
AT5G63860	UVR8		0.607961
AT5G64240	MC3		0.896138
AT5G64270	-		0.621492
AT5G64390	HEN4		1.33384
AT5G64860	DPE1		1.00631
AT5G65207	-		1.7709
AT5G65840	-		0.62322
AT5G65890	ACR1		1.48544
AT5G66052	-		1.22756
AT5G66250	-		0.647017
AT5G66570	PSBO1		1.42965
AT5G66580	-		2.30619
AT5G66590	-		2.12245
AT5G66675	-		0.738208
AT5G66790	-		1.14403
AT5G67420	LBD37		1.18837
ATCG00280	PSBC		0.676361
ATCG00340	PSAB		0.870706
ATCG00350	PSAA		0.867086

## Sheet: Table S4
Table S4. DEGs in toc1-2 annotated with GO terms biotic stimulus/defence response
Gene ID	Gene Model Description	Primary Gene Symbol	GO terms	UP or DOWN-regulated in toc1-2
AT1G01010	Member of the NAC domain containing family of plant specific transcriptional regulators.	NAC DOMAIN CONTAINING PROTEIN 1 (NAC001) NAC DOMAIN CONTAINING PROTEIN 1 (ANAC001); (NTL10);NAC DOMAIN CONTAINING PROTEIN 1 (NAC001)	defence response, biotic stimulus	DOWN
AT1G02360	Chitinase family protein;(source:Araport11)		biotic stimulus	DOWN
AT1G02920	Encodes glutathione transferase belonging to the phi class of GSTs. Naming convention according to Wagner et al. (2002).	GLUTATHIONE S-TRANSFERASE 7 (GSTF7) (ATGSTF7);GLUTATHIONE S-TRANSFERASE 11 (GST11); (ATGSTF8);GLUTATHIONE S-TRANSFERASE 7 (GSTF7);ARABIDOPSIS GLUTATHIONE S-TRANSFERASE 11 (ATGST11)	defence response, biotic stimulus	DOWN
AT1G03400	A single copy gene that encodes a protein with sequence similarity to tomato E8 (ACC oxidase, the last step in ethylene biosynthesis) involved in ethylene synthesis and fruit ripening in tomato. This gene is not induced by ethylene in siliques. The transcript is found in siliques, etiolated seedlings, leaves, stems and flowers.		defence response, biotic stimulus	UP
AT1G04400	Blue light receptor mediating blue-light regulated cotyledon expansion and flowering time. Positive regulator of the flowering-time gene CONSTANS. This gene possesses a light-induced CNT2 N-terminal homodimerisation domain.Involved in blue-light induced stomatal opening. Involved in triggering chromatin decondensation. An 80-residue motif (NC80) is sufficient to confer CRY2's physiological functi…	CRYPTOCHROME 2 (CRY2) CRYPTOCHROME 2 (CRY2); (FHA); (AT-PHH1); (PHH1); (ATCRY2)	defence response, biotic stimulus	UP
AT1G05010	Encodes 1-aminocyclopropane-1-carboxylate oxidase	ETHYLENE-FORMING ENZYME (EFE) ETHYLENE-FORMING ENZYME (EFE);ETHYLENE FORMING ENZYME (ACO4); (EAT1)	biotic stimulus	DOWN
AT1G05700	Leucine-rich repeat transmembrane protein kinase protein;(source:Araport11)		defence response, biotic stimulus	DOWN
AT1G06160	encodes a member of the ERF (ethylene response factor) subfamily B-3 of ERF/AP2 transcription factor family. The protein contains one AP2 domain. There are 18 members in this subfamily including ATERF-1, ATERF-2, AND ATERF-5.	OCTADECANOID-RESPONSIVE ARABIDOPSIS AP2/ERF 59 (ORA59) OCTADECANOID-RESPONSIVE ARABIDOPSIS AP2/ERF 59 (ORA59);ETHYLENE RESPONSIVE FACTOR 59 (ERF59)	defence response, biotic stimulus	UP
AT1G06620	encodes a protein whose sequence is similar to a 2-oxoglutarate-dependent dioxygenase The mRNA is cell-to-cell mobile.		defence response, biotic stimulus	DOWN
AT1G07310	Calcium-dependent lipid-binding (CaLB domain) family protein;(source:Araport11)		defence response	UP
AT1G07985	Protein of unknown function. May function in tethering lipid droplet to the plasma membrane via interaction with SLDP1/2.	LIPID DROPLET PLASMA MEMBRANE ADAPTOR (LIPA) LIPID DROPLET PLASMA MEMBRANE ADAPTOR (LIPA)	defence response	DOWN
AT1G10090	Early-responsive to dehydration stress protein (ERD4);(source:Araport11)	REDUCED HYPEROSMOLALITY-INDUCED CA2+ INCREASE 2.2 (OSCA2.2) REDUCED HYPEROSMOLALITY-INDUCED CA2+ INCREASE 2.2 (OSCA2.2)	defence response, biotic stimulus	UP
AT1G10170	Encodes AtNFXL1, a homologue of the putative human transcription repressor NF-X1. Functions as a negative regulator of the trichothecene phytotoxin-induced defense response.		defence response, biotic stimulus	UP
AT1G10650	SBP (S-ribonuclease binding protein) family protein;(source:Araport11)		defence response	DOWN
AT1G11580	Pectin methylesterase involved in root growth, plant-pathogen interactions.	PECTIN METHYL ESTERASE INHIBITOR-PECTIN METHYLESTERASE 18 (PMEI-PME18) PECTIN METHYL ESTERASE INHIBITOR-PECTIN METHYLESTERASE 18 (PMEI-PME18)	biotic stimulus	DOWN
AT1G12990	beta-1,4-N-acetylglucosaminyltransferase family protein;(source:Araport11)		defence response, biotic stimulus	UP
AT1G13520	hypothetical protein (DUF1262);(source:Araport11)		defence response, biotic stimulus	DOWN
AT1G15530	Concanavalin A-like lectin protein kinase family protein;(source:Araport11)	L-TYPE LECTIN RECEPTOR KINASE S.1 (LECRK-S.1) L-TYPE LECTIN RECEPTOR KINASE S.1 (LECRK-S.1)	defence response, biotic stimulus	UP
AT1G17147	VQ motif-containing protein;(source:Araport11)		defence response, biotic stimulus	UP
AT1G18570	Encodes a member of the R2R3-MYB transcription family. Involved in indole glucosinolate biosynthesis. The mRNA is cell-to-cell mobile.	MYB DOMAIN PROTEIN 51 (MYB51) MYB DOMAIN PROTEIN 51 (MYB51);MYB DOMAIN PROTEIN 51 (AtMYB51); (BW51A); (BW51B);HIGH INDOLIC GLUCOSINOLATE 1 (HIG1)	defence response, biotic stimulus	UP
AT1G19610	Predicted to encode a PR (pathogenesis-related) protein. Belongs to the plant defensin (PDF) family with the following members: At1g75830/PDF1.1, At5g44420/PDF1.2a, At2g26020/PDF1.2b, At5g44430/PDF1.2c, At2g26010/PDF1.3, At1g19610/PDF1.4, At1g55010/PDF1.5, At2g02120/PDF2.1, At2g02100/PDF2.2, At2g02130/PDF2.3, At1g61070/PDF2.4, At5g63660/PDF2.5, At2g02140/PDF2.6, At5g38330/PDF3.1 and At4g30070/PDF…	(PDF1.4) (PDF1.4);LOW-MOLECULAR-WEIGHT CYSTEINE-RICH 78 (LCR78)	defence response	DOWN
AT1G20310	syringolide-induced protein;(source:Araport11)		defence response, biotic stimulus	DOWN
AT1G20510	Encodes an OPC-8:CoA ligase involved in jasmonic acid biosynthesis.	OPC-8:0 COA LIGASE1 (OPCL1) OPC-8:0 COA LIGASE1 (OPCL1)	biotic stimulus	UP
AT1G21050	MIZU-KUSSEI-like protein (Protein of unknown function, DUF617);(source:Araport11)		defence response, biotic stimulus	UP
AT1G21326	VQ motif-containing protein;(source:Araport11)		defence response, biotic stimulus	UP
AT1G21830	hypothetical protein;(source:Araport11)		defence response, biotic stimulus	UP
AT1G23850	transmembrane protein;(source:Araport11)		defence response, biotic stimulus	UP
AT1G24170	Encodes a protein with putative galacturonosyltransferase activity.	(LGT9) GALACTURONOSYLTRANSFERASE-LIKE 8 (GATL8); (LGT9)	defence response, biotic stimulus	DOWN
AT1G24530	Transducin/WD40 repeat-like superfamily protein;(source:Araport11)		defence response, biotic stimulus	DOWN
AT1G27020	plant/protein;(source:Araport11)		defence response, biotic stimulus	UP
AT1G28600	GDSL-motif esterase/acyltransferase/lipase. Enzyme group with broad substrate specificity that may catalyze acyltransfer or hydrolase reactions with lipid and non-lipid substrates.	GUARD-CELL-ENRICHED GDSL LIPASE 2 (GGL2) GUARD-CELL-ENRICHED GDSL LIPASE 2 (GGL2)	defence response, biotic stimulus	DOWN
AT1G30360	Early-responsive to dehydration stress protein (ERD4);(source:Araport11)	EARLY-RESPONSIVE TO DEHYDRATION 4 (ERD4) REDUCED HYPEROSMOLALITY-INDUCED CA2+ INCREASE 3.1 (OSCA3.1);EARLY-RESPONSIVE TO DEHYDRATION 4 (ERD4)	defence response, biotic stimulus	DOWN
AT1G30700	FAD-binding Berberine family protein;(source:Araport11)	(ATBBE8) (ATBBE8)	defence response, biotic stimulus	DOWN
AT1G30730	FAD-binding Berberine family protein;(source:Araport11)	(ATBBE11) (ATBBE11)	biotic stimulus	DOWN
AT1G32540	Encodes a protein with 3 plant-specific zinc finger domains that acts as a positive regulator of cell death.	LSD ONE LIKE 1 (LOL1) LSD ONE LIKE 1 (LOL1)	defence response, biotic stimulus	UP
AT1G33560	Encodes a NBS-LRR disease resistance protein that possesses N-terminal kinase subdomains. Activation tagged mutant of ADR1 showed elevated levels of SA and reactive oxygen species in addition to number of defense gene transcripts. Exhibits resistance to number of microbial pathogens.	ACTIVATED DISEASE RESISTANCE 1 (ADR1) ACTIVATED DISEASE RESISTANCE 1 (ADR1)	defence response, biotic stimulus	UP
AT1G36622	transmembrane protein;(source:Araport11)		defence response, biotic stimulus	DOWN
AT1G48490	Protein kinase which together with IREH1 plays an important role in controlling root skewing and maintaining the microtubule network.	INCOMPLETE ROOT HAIR ELONGATION 3 (IRE3) INCOMPLETE ROOT HAIR ELONGATION 3 (IRE3)	defence response, biotic stimulus	UP
AT1G49050	Encodes a member of the aspartyl protease family. Interacts with BAGP1 and BAG6 and appears to be required for cleavage of BAG6 as BAG6 is not cleaved in APCB1 mutant backgrounds.	(APCB1) (APCB1)	defence response, biotic stimulus	UP
AT1G51360	Involved in defense against fungal pathogens and located in cytosol.	DIMERIC A/B BARREL DOMAINS-PROTEIN 1 (DABB1) DIMERIC A/B BARREL DOMAINS-PROTEIN 1 (ATDABB1);DIMERIC A/B BARREL DOMAINS-PROTEIN 1 (DABB1)	defence response, biotic stimulus	UP
AT1G51500	Encodes an ABC transporter involved in cuticular wax biosynthesis. Lines carrying recessive mutations in this locus have weakly glaucous stem surface, and relative elevated secondary alcohols and ketones.	ATP-BINDING CASSETTE G12 (ABCG12) WHITE-BROWN COMPLEX 12 (WBC12);ATP-BINDING CASSETTE G12 (ABCG12); (D3);ECERIFERUM 5 (CER5);ARABIDOPSIS THALIANA WHITE-BROWN COMPLEX 12 (ATWBC12); (AtABCG12)	defence response, biotic stimulus	UP
AT1G51790	Leucine-rich repeat protein kinase family protein;(source:Araport11)		defence response, biotic stimulus	DOWN
AT1G51800	The gene encodes a putative member of the LRR-RLK protein family. Expressin and mutant analysis revealed that it contributes to the interaction between Arabidopsis and Hyaloperonospora arabidopsidis. and The mRNA is cell-to-cell mobile.	IMPAIRED OOMYCETE SUSCEPTIBILITY 1 (IOS1) IMPAIRED OOMYCETE SUSCEPTIBILITY 1 (IOS1)	defence response, biotic stimulus	DOWN
AT1G52740	Encodes HTA9, a histone H2A protein. Loss of all H2A.Z (triple mutant with HTA8 and HTA11) results in a reduction in DNA methylation of transposons but not that of genes. Loss of H2A.Z causes misregulation of many genes involved in the response to developmental and environmental cues, and that these genes tend to have high levels of gene-body H2A.Z.	HISTONE H2A PROTEIN 9 (HTA9) HISTONE H2A PROTEIN 9 (HTA9); (H2A.Z)	defence response, biotic stimulus	UP
AT1G53320	Member of plant TLP family. TLP7 is tethered to the PM but detaches upon stimulus and translocates to the nucleus. Has DNA binding activity but lacks conservation of the transcription activation domain.	TUBBY LIKE PROTEIN 7 (TLP7) TUBBY LIKE PROTEIN 7 (AtTLP7);TUBBY LIKE PROTEIN 7 (TLP7)	biotic stimulus	UP
AT1G54040	Epithiospecifier protein, interacts with WRKY53. Involved in pathogen resistance and leaf senescence.	EPITHIOSPECIFIER PROTEIN (ESP) (TASTY);EPITHIOSPECIFIER PROTEIN (ESP)	defence response, biotic stimulus	UP
AT1G55210	Disease resistance-responsive (dirigent-like protein) family protein;(source:Araport11)	DIRIGENT PROTEIN 20 (DIR20) DIRIGENT PROTEIN 20 (DIR20)	biotic stimulus	DOWN
AT1G55490	encodes the beta subunit of the chloroplast chaperonin 60, a homologue of bacterial GroEL. Mutants in this gene develops lesions on its leaves, expresses systemic acquired resistance (SAR) and develops accelerated cell death to heat shock stress. The protein has molecular chaperone activity for suppressing protein aggregation in vitro.	CHAPERONIN 60 BETA (CPN60B) (CPNB1);CHAPERONIN 60 BETA (CPN60B);CHAPERONIN-60BETA1 (CPN60BETA1);LESION INITIATION 1 (LEN1)	defence response, biotic stimulus	DOWN
AT1G56540	Disease resistance protein (TIR-NBS-LRR class) family;(source:Araport11)		defence response, biotic stimulus	UP
AT1G57560	Member of the R2R3 factor gene family.	MYB DOMAIN PROTEIN 50 (MYB50) MYB DOMAIN PROTEIN 50 (AtMYB50);MYB DOMAIN PROTEIN 50 (MYB50)	defence response, biotic stimulus	DOWN
AT1G58270	ZW9 mRNA, complete cds The mRNA is cell-to-cell mobile.	(ZW9) (ZW9)	defence response, biotic stimulus	DOWN
AT1G58340	Encodes a plant MATE (multidrug and toxic compound extrusion) transporter that is localized to the Golgi complex and small organelles and is involved in determining the rate of organ initiation. It is also involved in iron homeostasis when plants are under osmotic stress.	(ZF14) (ZF14);ZRIZI (ZRZ);BUSH-AND-CHLOROTIC-DWARF 1 (BCD1);ARABIDOPSIS ABNORMAL SHOOT4 (ABS4)	biotic stimulus	UP
AT1G59870	ATP binding cassette transporter. Localized to the plasma membrane in uninfected cells. In infected leaves, the protein concentrated at infection sites. Contributes to nonhost resistance to inappropriate pathogens that enter by direct penetration in a salicylic acid?dependent manner. Required for mlo resistance. Has Cd transporter activity (Cd2+ extrusion pump) and contributes to heavy metal resi…	PENETRATION 3 (PEN3) PENETRATION 3 (PEN3);PLEIOTROPIC DRUG RESISTANCE 8 (PDR8);ARABIDOPSIS PLEIOTROPIC DRUG RESISTANCE 8 (ATPDR8);ATP-BINDING CASSETTE G36 (ABCG36);ARABIDOPSIS THALIANA ATP-BINDING CASSETTE G36 (ATABCG36)	defence response, biotic stimulus	UP
AT1G61120	Encodes a geranyllinalool synthase that produces a precursor to TMTT, a volatile plant defense C16-homoterpene. GES transcript levels rise in response to alamethicin, a fungal peptide mixture that damages membranes. This transcriptional response is blocked in JA biosynthetic and JA signaling mutants, but GES transcript levels still rise in response to alamethicin in mutants with salicylic acid an…	TERPENE SYNTHASE 04 (TPS04) GERANYLLINALOOL SYNTHASE (GES);TERPENE SYNTHASE 04 (TPS04);TERPENE SYNTHASE 4 (TPS4)	biotic stimulus	DOWN
AT1G61500	S-locus lectin protein kinase family protein;(source:Araport11)		defence response, biotic stimulus	UP
AT1G61667	serine protease, putative (Protein of unknown function, DUF538);(source:Araport11)		defence response, biotic stimulus	DOWN
AT1G61740	Sulfite exporter TauE/SafE family protein;(source:Araport11)		defence response, biotic stimulus	UP
AT1G61800	glucose6-Phosphate/phosphate transporter 2, prefers to exchange Pi or Triose-P for G6P, targets only plastids. Expression is upregulated in the shoot of cax1/cax3 mutant.The mRNA is cell-to-cell mobile.		biotic stimulus	DOWN
AT1G64280	This gene is a key regulator of the salicylic acid (SA)-mediated systemic acquired resistance (SAR) pathway. It is similar to the transcription factor inhibitor I kappa B, and contains ankyrin repeats. It confers resistance to the pathogens Pseudomonas syringae and Peronospora parasitica in a dosage-dependent fashion. Although transgenic Arabidopsis plants overexpressing NPR1 acquire enhanced sen…	NONEXPRESSER OF PR GENES 1 (NPR1) NONEXPRESSER OF PR GENES 1 (NPR1);SALICYLIC ACID INSENSITIVE 1 (SAI1);NON-INDUCIBLE IMMUNITY 1 (NIM1);ARABIDOPSIS NONEXPRESSER OF PR GENES 1 (ATNPR1)	defence response, biotic stimulus	UP
AT1G64780	encodes an ammonium transporter protein believed to act as a high affinity transporter. It is expressed in the root, primarily in endodermal and cortical cells, and contributes to ammonium uptake in the root.	AMMONIUM TRANSPORTER 1;2 (AMT1;2) AMMONIUM TRANSPORTER 1;2 (ATAMT1;2);AMMONIUM TRANSPORTER 1;2 (AMT1;2)	biotic stimulus	DOWN
AT1G67530	ARM repeat superfamily protein;(source:Araport11)	(PUB7) (PUB7)	defence response	UP
AT1G68110	An ENTH (Epsin NH2 terminal homology)/ANTH/VHS superfamily protein with adenylate cyclase activity and a role in clathrin assembly and endocytosis.	CLATHRIN ASSEMBLY PROTEIN (CLAP) CLATHRIN ASSEMBLY PROTEIN (CLAP); (PICALM9B);ENDOCYTOSIS ADAPTOR OF POLLEN TUBE (EAP1)	defence response, biotic stimulus	DOWN
AT1G68440	Transmembrane protein;(source:Araport11). Expression induced by abiotic stressors such as ABA, drought, heat, light, NaCl, osmotic stress and wounding.		defence response, biotic stimulus	DOWN
AT1G69760	suppressor SRP40-like protein;(source:Araport11)		defence response, biotic stimulus	DOWN
AT1G69840	SPFH/Band 7/PHB domain-containing membrane-associated protein family;(source:Araport11)	HYPERSENSITIVE INDUCED REACTION 1 (ATHIR1) HYPERSENSITIVE INDUCED REACTION 1 (ATHIR1)	defence response, biotic stimulus	UP
AT1G70090	Encodes a protein with putative galacturonosyltransferase activity.	GLUCOSYL TRANSFERASE FAMILY 8 (LGT8) GALACTURONOSYLTRANSFERASE-LIKE 9 (GATL9);GLUCOSYL TRANSFERASE FAMILY 8 (LGT8)	defence response, biotic stimulus	DOWN
AT1G70160	zinc finger MYND domain protein;(source:Araport11)		defence response, biotic stimulus	UP
AT1G70830	MLP-like protein 28;(source:Araport11)	MLP-LIKE PROTEIN 28 (MLP28) MLP-LIKE PROTEIN 28 (MLP28)	defence response	UP
AT1G71220	Encodes UDP-glucose:glycoprotein glucosyltransferase. Non-receptor component required for EFR-mediated immunity. Mutants show de-repressed anthocyanin accumulation in the presence of elf18, and EFR accumulation and signalling.		defence response, biotic stimulus	DOWN
AT1G72510	DUF1677 family protein (DUF1677);(source:Araport11)		defence response	DOWN
AT1G72940	Nucleotide-binding, leucine-rich repeat (NLR) gene regulated by nonsense-mediated mRNA decay (NMD) genes UPF1 and UPF3.	TIR-NBS11 (TN11) TIR-NBS11 (TN11)	defence response, biotic stimulus	UP
AT1G73500	member of MAP Kinase Kinase family. Autophosphorylates and also phosphorylates MPK3 and MPK6. Independently involved in ethylene and calmalexin biosynthesis. Induces transcription of ACS2, ACS6, ERF1, ERF2, ERF5, ERF6, CYP79B2, CYP79B3, CYP71A13 and PAD3.	MAP KINASE KINASE 9 (MKK9) MAP KINASE KINASE 9 (MKK9); (ATMKK9)	biotic stimulus	UP
AT1G74010	Calcium-dependent phosphotriesterase superfamily protein;(source:Araport11)		defence response, biotic stimulus	DOWN
AT1G74020	Encodes AtSS-2 strictosidine synthase.	STRICTOSIDINE SYNTHASE 2 (SS2) STRICTOSIDINE SYNTHASE 2 (SS2)	defence response	DOWN
AT1G74100	encodes a desulfoglucosinolate sulfotransferase, involved in the final step of glucosinolate core structure biosynthesis. Has a broad-substrate specificity with different desulfoglucosinolates, the best substrate is indole-3-methyl-dsGS, followed by benzyl-dsGS. Expression was induced by wounding, jasmonate and ethylene stimulates.	SULFOTRANSFERASE 16 (SOT16) SULFOTRANSFERASE 16 (SOT16);ARABIDOPSIS SULFOTRANSFERASE 5A (ATST5A);CORONATINE INDUCED-7 (CORI-7);SULFOTRANSFERASE 16 (ATSOT16)	defence response, biotic stimulus	UP
AT1G75830	Predicted to encode a PR (pathogenesis-related) protein. Belongs to the plant defensin (PDF) family with the following members: At1g75830/PDF1.1, At5g44420/PDF1.2a, At2g26020/PDF1.2b, At5g44430/PDF1.2c, At2g26010/PDF1.3, At1g19610/PDF1.4, At1g55010/PDF1.5, At2g02120/PDF2.1, At2g02100/PDF2.2, At2g02130/PDF2.3, At1g61070/PDF2.4, At5g63660/PDF2.5, At2g02140/PDF2.6, At5g38330/PDF3.1 and At4g30070/PDF…	LOW-MOLECULAR-WEIGHT CYSTEINE-RICH 67 (LCR67) LOW-MOLECULAR-WEIGHT CYSTEINE-RICH 67 (LCR67); (PR12);PLANT DEFENSIN 1.1 (PDF1.1)	defence response	UP
AT1G75830	Predicted to encode a PR (pathogenesis-related) protein. Belongs to the plant defensin (PDF) family with the following members: At1g75830/PDF1.1, At5g44420/PDF1.2a, At2g26020/PDF1.2b, At5g44430/PDF1.2c, At2g26010/PDF1.3, At1g19610/PDF1.4, At1g55010/PDF1.5, At2g02120/PDF2.1, At2g02100/PDF2.2, At2g02130/PDF2.3, At1g61070/PDF2.4, At5g63660/PDF2.5, At2g02140/PDF2.6, At5g38330/PDF3.1 and At4g30070/PDF…	LOW-MOLECULAR-WEIGHT CYSTEINE-RICH 67 (LCR67) LOW-MOLECULAR-WEIGHT CYSTEINE-RICH 67 (LCR67); (PR12);PLANT DEFENSIN 1.1 (PDF1.1)	defence response	DOWN
AT1G78460	SOUL heme-binding family protein;(source:Araport11)	CYTOSOLIC HEME (TETRAPYRROLE) BINDING PROTEIN 3 (CHBP3) CYTOSOLIC HEME (TETRAPYRROLE) BINDING PROTEIN 3 (CHBP3)	defence response, biotic stimulus	UP
AT1G80280	Plasma membrane localized protein that binds to to Xanthomonas campestris pv. campestris XopAM avirulent effector protein.		defence response, biotic stimulus	DOWN
AT1G80460	Encodes a protein similar to glycerol kinase, which converts glycerol to glycerol 3-phosphate and performs a rate-limiting step in glycerol metabolism. This gene is required for both general and specific resistance against bacteria and fungi. Arabidopsis thaliana glycerol kinase (GLR1) mRNA.Involved in flagellin-induced non-host resistance to Pseudomonas. Coronatine partially suppresses flagellin…	NONHOST RESISTANCE TO P. S. PHASEOLICOLA 1 (NHO1) NONHOST RESISTANCE TO P. S. PHASEOLICOLA 1 (NHO1); (GLI1)	defence response, biotic stimulus	UP
AT2G02930	Encodes glutathione transferase belonging to the phi class of GSTs. Naming convention according to Wagner et al. (2002).	GLUTATHIONE S-TRANSFERASE F3 (GSTF3) GLUTATHIONE S-TRANSFERASE F3 (ATGSTF3);GLUTATHIONE S-TRANSFERASE 16 (GST16);GLUTATHIONE S-TRANSFERASE F3 (GSTF3)	biotic stimulus	UP
AT2G02990	Encodes a member of the ribonuclease T2 family that responds to inorganic phosphate starvation, and inhibits production of anthocyanin. Also involved in wound-induced signaling independent of jasmonic acid. Its expression is responsive to both phosphate (Pi) and phosphite (Phi) in roots.	RIBONUCLEASE 1 (RNS1) RIBONUCLEASE 1 (ATRNS1);RIBONUCLEASE 1 (RNS1)	biotic stimulus	DOWN
AT2G03440	Induced at the transcriptional level by Pseudomonas syringae pv. tomato infection.	NODULIN-RELATED PROTEIN 1 (NRP1) NODULIN-RELATED PROTEIN 1 (NRP1); (ATNRP1)	biotic stimulus	UP
AT2G03730	Member of a small family of ACT domain containing proteins. ACT domains are thought to be involved in amino acid binding.	ACT DOMAIN REPEAT 5 (ACR5) ACT DOMAIN REPEAT 5 (ACR5)	defence response, biotic stimulus	UP
AT2G04450	Encodes a protein with NADH pyrophosphatase activity. Although this protein was also shown to have ADP-ribose diphosphatase activity in vitro, mutant analyses suggest that NUDX6 is involved in NADH metabolism in vivo.	NUDIX HYDROLASE HOMOLOG 6 (NUDT6) NUCLEOSIDE DIPHOSPHATES LINKED TO SOME MOIETY X 6 (NUDX6);ARABIDOPSIS THALIANA NUCLEOSIDE DIPHOSPHATE LINKED TO SOME MOIETY X 6 (ATNUDX6);NUDIX HYDROLASE HOMOLOG 6 (NUDT6);NUDIX HYDROLASE HOMOLOG 6 (ATNUDT6)	biotic stimulus	DOWN
AT2G06050	Encodes a 12-oxophytodienoate reductase that is required for jasmonate biosynthesis. Mutants are male sterile and defective in pollen dehiscence. Shows activity towards 2,4,6-trinitrotoluene. CFA-Ile, CFA-Leu, CFA-Val, CFA-Met and CFA-Ala can restore the fertility of opr3 plants by inducing filament elongation and anther dehiscence.	OXOPHYTODIENOATE-REDUCTASE 3 (OPR3) (AtOPR3);DELAYED DEHISCENCE 1 (DDE1);OXOPHYTODIENOATE-REDUCTASE 3 (OPR3)	biotic stimulus	UP
AT2G07000	hypothetical protein;(source:Araport11)		defence response, biotic stimulus	UP
AT2G15490	UDP-glycosyltransferase 73B4;(source:Araport11)	UDP-GLYCOSYLTRANSFERASE 73B4 (UGT73B4) UDP-GLYCOSYLTRANSFERASE 73B4 (UGT73B4)	biotic stimulus	DOWN
AT2G15830	hypothetical protein;(source:Araport11)		biotic stimulus	UP
AT2G17520	Encodes a endoribonuclease/protein kinase IRE1-like protein that is predicted to form a type I transmembrane protein structure and contain kinase/endoribonuclease domains at their C-terminal halves. The transcript levels for several ER-stress responsive genes, including six protein disulfide isomerases (PDIs), BiP2, and AtbZIP60 are not affected in ire1-2 null mutants. The mRNA is cell-to-cell mo…	(IRE1A) (IRE1A);ARABIDOPSIS THALIANA INOSITOL REQUIRING 1-2 (ATIRE1-2);INOSITOL REQUIRING 1-2 (IRE1-2); (ATIRE1A)	defence response, biotic stimulus	UP
AT2G18280	Member of TLP family The mRNA is cell-to-cell mobile.	TUBBY LIKE PROTEIN 2 (TLP2) TUBBY LIKE PROTEIN 2 (TLP2);TUBBY LIKE PROTEIN 2 (AtTLP2)	biotic stimulus	UP
AT2G18670	RING/U-box superfamily protein;(source:Araport11)	ARABIDOPSIS T??XICOS EN LEVADURA 56 (ATL56) ARABIDOPSIS T??XICOS EN LEVADURA 56 (ATL56)	defence response, biotic stimulus	UP
AT2G19130	S-locus lectin protein kinase family protein;(source:Araport11)		defence response, biotic stimulus	UP
AT2G19190	Encodes a receptor-like protein kinase that is involved in early defense signaling. Expression of this gene is strongly induced during leaf senescence. It is a target of the transcription factor AtWRKY6.	FLG22-INDUCED RECEPTOR-LIKE KINASE 1 (FRK1) FLG22-INDUCED RECEPTOR-LIKE KINASE 1 (FRK1);SE- NESCENCE-INDUCED RECEPTOR-LIKE KINASE (SIRK)	defence response, biotic stimulus	DOWN
AT2G21500	RING/U-box superfamily protein;(source:Araport11)		defence response, biotic stimulus	UP
AT2G21660	Encodes a small glycine-rich RNA binding protein that is part of a negative-feedback loop through which AtGRP7 regulates the circadian oscillations of its own transcript. Gene expression is induced by cold. GRP7 appears to promote stomatal opening and reduce tolerance under salt and dehydration stress conditions, but, promotes stomatal closing and thereby increases stress tolerance under conditio…	COLD, CIRCADIAN RHYTHM, AND RNA BINDING 2 (CCR2) GLYCINE RICH PROTEIN 7 (ATGRP7);COLD, CIRCADIAN RHYTHM, AND RNA BINDING 2 (CCR2);GLYCINE-RICH RNA-BINDING PROTEIN 7 (GR-RBP7);GLYCINE-RICH RNA-BINDING PROTEIN 7 (GRP7);RNA-BINDING GLYCINE-RICH PROTEIN A3 (RBGA3);SMALL RNA-BINDING PROTEIN 1 (SRBP1)	defence response, biotic stimulus	UP
AT2G22240	** Referred to as MIPS1 in Mitsuhashi et al 2008. Myo-inositol-1-phosphate synthase isoform 2. Expressed in leaf, root and silique. Immunolocalization experiments with an antibody recognizing MIPS1, MIPS2, and MIPS3 showed endosperm localization.	MYO-INOSITOL-1-PHOSPHATE SYNTHASE 2 (MIPS2) INOSITOL 3-PHOSPHATE SYNTHASE 2 (ATIPS2);MYO-INOSITOL-1-PHOSPHATE SYNTHASE 2 (MIPS2);MYO-INOSITOL-1-PHOSPHATE SYNTHASE 1 (MIPS1);MYO-INOSITOL-1-PHOSPHATE SYNTHASE 1 (ATMIPS1);MYO-INOSITOL-1-PHOSTPATE SYNTHASE 2 (ATMIPS2)	defence response, biotic stimulus	UP
AT2G22330	Encodes a cytochrome P450. Involved in tryptophan metabolism. Converts Trp to indole-3-acetaldoxime (IAOx), a precursor to IAA and indole glucosinolates.The mRNA is cell-to-cell mobile.	CYTOCHROME P450, FAMILY 79, SUBFAMILY B, POLYPEPTIDE 3 (CYP79B3) CYTOCHROME P450, FAMILY 79, SUBFAMILY B, POLYPEPTIDE 3 (CYP79B3)	defence response, biotic stimulus	UP
AT2G23560	Encodes a protein shown to have carboxylesterase activity, methyl salicylate esterase activity, and methyl IAA esterase activity in vitro. This protein does not act on methyl JA, MeGA4, or MEGA9 in vitro. MES7 appears to be involved in MeSA hydrolysis in planta. Expression of MES7 can restore systemic acquired resistance in SAR-deficient tobacco plants.	METHYL ESTERASE 7 (MES7) ARABIDOPSIS THALIANA METHYL ESTERASE 7 (ATMES7);METHYL ESTERASE 7 (MES7)	defence response, biotic stimulus	DOWN
AT2G24100	ATP-dependent DNA helicase;(source:Araport11)	ALTERED SEED GERMINATION 1 (ASG1) ALTERED SEED GERMINATION 1 (ASG1)	defence response, biotic stimulus	UP
AT2G24850	Encodes a tyrosine aminotransferase that is responsive to treatment with jasmonic acid.	TYROSINE AMINOTRANSFERASE 3 (TAT3) TYROSINE AMINOTRANSFERASE 3 (TAT3);TYROSINE AMINOTRANSFERASE (TAT)	defence response	DOWN
AT2G25000	Pathogen-induced transcription factor. Forms protein complexes with itself and with WRKY40. Coexpression with WRKY18 or WRKY40 made plants more susceptible to both P. syringae and B. cinerea. WRKY18, WRKY40, and WRKY60 have partially redundant roles in response to the hemibiotrophic bacterial pathogen Pseudomonas syringae and the necrotrophic fungal pathogen Botrytis cinerea, with WRKY18 playing …	WRKY DNA-BINDING PROTEIN 60 (WRKY60) WRKY DNA-BINDING PROTEIN 60 (WRKY60); (ATWRKY60)	defence response, biotic stimulus	DOWN
AT2G25200	hypothetical protein (DUF868);(source:Araport11)		defence response, biotic stimulus	UP
AT2G26560	Encodes a lipid acyl hydrolase with wide substrate specificity that accumulates upon infection by fungal and bacterial pathogens. Protein is localized in the cytoplasm in healthy leaves, and in membranes in infected cells. Plays a role in cell death and differentially affects the accumulation of oxylipins. Contributes to resistance to virus.	PHOSPHOLIPASE A 2A (PLA2A) PHOSPHOLIPASE A 2A (PLP2);PHOSPHOLIPASE A 2A (PLA IIA);PHOSPHOLIPASE A 2A (PLA2A);PATATIN-LIKE PROTEIN 2 (PLP2); (PLAII ALPHA)	defence response, biotic stimulus	UP
AT2G27050	ethylene-insensitive3-like1 (EIL1) The mRNA is cell-to-cell mobile.	ETHYLENE-INSENSITIVE3-LIKE 1 (EIL1) ETHYLENE-INSENSITIVE3-LIKE 1 (EIL1); (AtEIL1)	defence response, biotic stimulus	UP
AT2G27830	hypothetical protein;(source:Araport11)		defence response, biotic stimulus	UP
AT2G29020	Rab5-interacting family protein;(source:Araport11)		defence response, biotic stimulus	UP
AT2G29320	NAD(P)-binding Rossmann-fold superfamily protein;(source:Araport11)		defence response, biotic stimulus	UP
AT2G29350	Encodes a senescence associated protein required for resistance against fungal pathogens. Negative regulator of defense against bacterial pathogens. Induced by ROS. Required for defense against ROS and fungal pathogens most likely by activating anthocyanin biosynthesis.	SENESCENCE-ASSOCIATED GENE 13 (SAG13) SENESCENCE-ASSOCIATED GENE 13 (SAG13)	defence response, biotic stimulus	DOWN
AT2G29650	Encodes an inorganic phosphate transporter (PHT4;1) that is localized to the thylakoid membrane.	PHOSPHATE TRANSPORTER 4;1 (PHT4;1) ANION TRANSPORTER 1 (ANTR1);PHOSPHATE TRANSPORTER 4;1 (PHT4;1)	biotic stimulus	UP
AT2G30490	Encodes a cinnamate-4-hydroxylase. Mutations in this gene impact phenylpropanoid metabolism, growth and development.	CINNAMATE-4-HYDROXYLASE (C4H) CINNAMATE 4-HYDROXYLASE (ATC4H);CINNAMATE-4-HYDROXYLASE (C4H); (CYP73A5);REDUCED EPRDERMAL FLUORESCENCE 3 (REF3)	defence response	DOWN
AT2G30720	Thioesterase/thiol ester dehydrase-isomerase superfamily protein;(source:Araport11)		defence response, biotic stimulus	DOWN
AT2G30760	hypothetical protein;(source:Araport11)		defence response, biotic stimulus	UP
AT2G30860	Encodes glutathione transferase belonging to the phi class of GSTs. Naming convention according to Wagner et al. (2002).	GLUTATHIONE S-TRANSFERASE PHI 9 (GSTF9) (ATGSTF7);GLUTATHIONE S-TRANSFERASE PHI 9 (GSTF9);GLUTATHIONE S-TRANSFERASE PHI 9 (ATGSTF9); (GLUTTR)	defence response	UP
AT2G33340	Encodes MAC3B, a U-box proteins with homology to the yeast and human E3 ubiquitin ligase Prp19. Associated with the MOS4-Associated Complex (MAC). Involved in plant innate immunity. Regulator of flowering time.	MOS4-ASSOCIATED COMPLEX 3B (MAC3B) MOS4-ASSOCIATED COMPLEX 3B (MAC3B);PLANT U-BOX 60 (PUB60)	defence response, biotic stimulus	UP
AT2G33830	Negative regulator of local and systemic acquired resistance; target of FLD for activation of SAR.	DORMANCY ASSOCIATED GENE 2 (DRM2) DORMANCY/AUXIN ASSOCIATED FAMILY PROTEIN 2( (DAP2); (ATDRM2);DORMANCY ASSOCIATED GENE 2 (DRM2)	biotic stimulus	UP
AT2G36145	hypothetical protein;(source:Araport11)		defence response	UP
AT2G36950	Heavy metal transport/detoxification superfamily protein;(source:Araport11)	HEAVY METAL ASSOCIATED PROTEIN 20 (ATHMP20) HEAVY METAL ASSOCIATED PROTEIN 20 (ATHMP20)	defence response, biotic stimulus	DOWN
AT2G36970	UDP-Glycosyltransferase superfamily protein;(source:Araport11)		biotic stimulus	DOWN
AT2G37870	Bifunctional inhibitor/lipid-transfer protein/seed storage 2S albumin superfamily protein;(source:Araport11)		defence response, biotic stimulus	UP
AT2G38000	chaperone protein dnaJ-like protein;(source:Araport11)		defence response, biotic stimulus	UP
AT2G38790	hypothetical protein;(source:Araport11)		defence response, biotic stimulus	UP
AT2G38870	Predicted to encode a PR (pathogenesis-related) peptide that belongs to the PR-6 proteinase inhibitor family. Six putative PR-6-type protein encoding genes are found in Arabidopsis: At2g38900, At2g38870, At5g43570, At5g43580, At3g50020 and At3g46860.		defence response, biotic stimulus	DOWN
AT2G39200	A member of a large family of seven-transmembrane domain proteins specific to plants, homologs of the barley mildew resistance locus o (MLO) protein. The Arabidopsis genome contains 15 genes encoding MLO proteins, with localization in plasma membrane. Phylogenetic analysis revealed four clades of closely-related AtMLO genes. ATMLO6 belongs to the clade IV, with AtMLO2, AtMLO3 and AtMLO12. The gen…	MILDEW RESISTANCE LOCUS O 12 (MLO12) MILDEW RESISTANCE LOCUS O 12 (MLO12);MILDEW RESISTANCE LOCUS O 12 (ATMLO12)	defence response, biotic stimulus	DOWN
AT2G39530	Uncharacterized protein family (UPF0497);(source:Araport11)	CASP-LIKE PROTEIN 4D1 (CASPL4D1) CASP-LIKE PROTEIN 4D1 (CASPL4D1)	defence response, biotic stimulus	DOWN
AT2G41410	Calcium-binding EF-hand family protein;(source:Araport11)		defence response, biotic stimulus	UP
AT2G41430	Encodes hydrophilic protein lacking Cys residues that is expressed in response to drought stress, light stress and treatment with plant-growth-promoting rhizobacteria (Paenibacillus polymyxa), possibly revealing a connection between responses to biotic and abiotic stress. Also identified as a CTC Interacting Domain (CID) protein in a yeast two hybrid screen using the PAB2 protein as bait. Contain…	EARLY RESPONSIVE TO DEHYDRATION 15 (ERD15) EARLY RESPONSIVE TO DEHYDRATION 15 (ERD15);LIGHT STRESS RESPONSE DEFICIENT 1 (LSR1);LIGHT STRESS-REGULATED 1 (LSR1);CTC-INTERACTING DOMAIN 1 (CID1); (LSR1)	biotic stimulus	UP
AT2G41760	Controls the expression of specific defence-response genes, activates the synthesis pathway for the phytoalexin camalexin and influences basal resistance to Pseudomonas syringae pv tomato (Pst).	GLN-SPECIFIC AMINO-TERMINAL (NT)-AMIDASE (NTAQ1) GLN-SPECIFIC AMINO-TERMINAL (NT)-AMIDASE (NTAQ1)	defence response, biotic stimulus	UP
AT2G42060	Cysteine/Histidine-rich C1 domain family protein;(source:Araport11)		defence response, biotic stimulus	UP
AT2G44370	Cysteine/Histidine-rich C1 domain family protein;(source:Araport11)		defence response, biotic stimulus	DOWN
AT2G44500	O-fucosyltransferase family protein;(source:Araport11)		defence response, biotic stimulus	DOWN
AT2G45360	ankyrin repeat/KH domain protein (DUF1442);(source:Araport11)		defence response, biotic stimulus	DOWN
AT2G46450	Member of Cyclic nucleotide gated channel family.Positive regulator of resistance against avirulent fungal pathogen.Suppresses the phenotype conferred by cpr22 in a dosage-dependent manner.	CYCLIC NUCLEOTIDE-GATED CHANNEL 12 (CNGC12) CYCLIC NUCLEOTIDE-GATED CHANNEL 12 (ATCNGC12);CYCLIC NUCLEOTIDE-GATED CHANNEL 12 (CNGC12)	defence response, biotic stimulus	UP
AT2G47130	Encodes a short-chain dehydrogenase/reductase that is not involved in ABA biosynthesis but plays an important role in plant defense response to bacteria.	SHORT-CHAIN DEHYDROGENASE/REDUCTASE 3 (SDR3) SHORT-CHAIN DEHYDROGENASE/REDUCTASE 3 (SDR3); (ATSDR3)	defence response, biotic stimulus	UP
AT2G47800	Encodes a plasma membrane localized ATPase transporter involved in multidrug transport. The expression of this gene is upregulated by herbicide safeners such as benoxacor, fluxofenim and fenclorim. The mRNA is cell-to-cell mobile.	ATP-BINDING CASSETTE C4 (ABCC4) MULTIDRUG RESISTANCE-ASSOCIATED PROTEIN 4 (ATMRP4); (EST3);MULTIDRUG RESISTANCE-ASSOCIATED PROTEIN 4 (MRP4);ATP-BINDING CASSETTE C4 (ABCC4)	biotic stimulus	DOWN
AT3G01310	Encodes a functional VIP1/PPIP5K-type ATP-grasp kinase that is involved in both InsP6 to InsP7 conversion and InsP7 to InsP8 conversion, producing the InsP8 cofactor of the ASK1-COI1-JAZ-jasmonate co-receptor complex. It is the major isoform in plants, is required for jasmonate-dependent defenses, and plays an important role in plant defenses against necrotrophic fungi and insect herbivores.	ARABIDOPSIS HOMOLOG OF YEAST VIP1 1 (ATVIP1) ARABIDOPSIS HOMOLOG OF YEAST VIP1 1 (ATVIP1);VIP HOMOLOG2 (VIH2);VIP1 HOMOLOG 1 (VIP1)	defence response, biotic stimulus	UP
AT3G03870	transmembrane protein;(source:Araport11)		defence response, biotic stimulus	UP
AT3G04220	Target of miR825/825. Mutants have decreased resistance to fungal pathogens.		defence response, biotic stimulus	DOWN
AT3G04350	vacuolar sorting-associated protein (DUF946);(source:Araport11)		defence response, biotic stimulus	UP
AT3G05200	Encodes a putative RING-H2 zinc finger protein ATL6 (ATL6). The mRNA is cell-to-cell mobile.	ARABIDOPSIS TOXICOS EN LEVADURA 6 (ATL6) ARABIDOPSIS TOXICOS EN LEVADURA 6 (ATL6)	defence response, biotic stimulus	UP
AT3G05360	receptor like protein 30;(source:Araport11)	RECEPTOR LIKE PROTEIN 30 (RLP30) RECEPTOR LIKE PROTEIN 30 (AtRLP30);RECEPTOR LIKE PROTEIN 30 (RLP30)	defence response, biotic stimulus	DOWN
AT3G08030	The mRNA of this gene is expressed in viable seeds. Its detection in a dry seed lot has potential for use as a molecular marker for germination performance as absence of expression correlates with decreased germination. Encodes DUF642 cell wall protein.	(ATHA2-1) (ATHA2-1)	defence response, biotic stimulus	UP
AT3G08760	Encodes an osmotic stress-inducible kinase that functions as a negative regulator of osmotic stress signaling in plants.	(ATSIK) (ATSIK)	defence response, biotic stimulus	UP
AT3G09030	EAP3 is a cytolsolic BTB/POZ-domain protein involved in trafficking of PEN3.	ENDOPLASMIC RETICULUM-ARRESTED PEN3 (EAP3) ENDOPLASMIC RETICULUM-ARRESTED PEN3 (EAP3)	defence response, biotic stimulus	UP
AT3G09440	Heat shock protein 70 isoform.	HEAT SHOCK PROTEIN 70-3 (HSP70-3) HEAT SHOCK PROTEIN 70-3 (HSP70-3)	biotic stimulus	DOWN
AT3G11480	The gene encodes a SABATH methyltransferase that methylates both salicylic acid and benzoic acid. It is highly expressed in flowers, induced by biotic and abiotic stress and thought to be involved in direct defense mechanism.	(BSMT1) (BSMT1); (ATBSMT1)	defence response, biotic stimulus	DOWN
AT3G11900	encodes an amino acid transporter that transports aromatic and neutral amino acids, IAA, and 2,4-D. Expressed in all tissues with highest abundance in flowers and cauline leaves. a member of a small gene family in Arabidopsis and represents a new class of amino acid transporters.	AROMATIC AND NEUTRAL TRANSPORTER 1 (ANT1) AROMATIC AND NEUTRAL TRANSPORTER 1 (ANT1)	biotic stimulus	UP
AT3G11930	Adenine nucleotide alpha hydrolases-like superfamily protein;(source:Araport11)		defence response	UP
AT3G12580	Cytoplasmically localized member of the heat shock protein 70 family. Forms complex(heat shock granule) with J3. Mutants are heat sensitive and show increased accummulation of insoluble proteins suggesting a role in thermotolerance.	HEAT SHOCK 70 KDA PROTEIN 4 (HSP70-4) ARABIDOPSIS HEAT SHOCK PROTEIN 70 (ATHSP70);HEAT SHOCK PROTEIN 70 (HSP70);HEAT SHOCK 70 KDA PROTEIN 4 (HSP70-4); (HSC70-4)	biotic stimulus	DOWN
AT3G13790	Encodes a protein with invertase activity. Cell wall invertase; involved in pollen development and pollen tube growth.	(ATBFRUCT1) ARABIDOPSIS THALIANA CELL WALL INVERTASE 1 (ATCWINV1); (ATBFRUCT1); (CWI1); (ATCWI1); (CWIN1)	defence response, biotic stimulus	DOWN
AT3G13910	hypothetical protein (DUF3511);(source:Araport11)		defence response, biotic stimulus	UP
AT3G14310	encodes a pectin methylesterase, targeted by a cellulose binding protein (CBP) from the parasitic nematode Heterodera schachtii during parasitism.	PECTIN METHYLESTERASE 3 (PME3) PECTIN METHYLESTERASE 3 (ATPME3);PECTIN METHYLESTERASE 3 (PME3);OVERLY ZINC SENSITIVE 2 (OZS2)	defence response, biotic stimulus	UP
AT3G14870	hypothetical protein (DUF641);(source:Araport11)	CHIQUITA1-LIKE 4 (CHIQL4) CHIQUITA1-LIKE 4 (CHIQL4)	defence response, biotic stimulus	DOWN
AT3G15210	Encodes a member of the ERF (ethylene response factor) subfamily B-1 of ERF/AP2 transcription factor family (ATERF-4). The protein contains one AP2 domain. Acts as a negative regulator of JA-responsive defense gene expression and resistance to the necrotrophic fungal pathogen Fusarium oxysporum and antagonizes JA inhibition of root elongation. The mRNA is cell-to-cell mobile.	ETHYLENE RESPONSIVE ELEMENT BINDING FACTOR 4 (ERF4) ETHYLENE RESPONSIVE ELEMENT BINDING FACTOR 4 (ATERF-4);ETHYLENE RESPONSIVE ELEMENT BINDING FACTOR 4 (ERF4);RELATED TO AP2 5 (RAP2.5);ETHYLENE RESPONSIVE ELEMENT BINDING FACTOR 4 (ATERF4)	defence response, biotic stimulus	UP
AT3G15350	G14 enzyme		defence response, biotic stimulus	DOWN
AT3G16530	Lectin like protein whose expression is induced upon treatment with chitin oligomers.		biotic stimulus	DOWN
AT3G16770	Encodes a member of the ERF (ethylene response factor) subfamily B-2 of the plant specific ERF/AP2 transcription factor family (RAP2.3). The protein contains one AP2 domain. There are 5 members in this subfamily including RAP2.2 AND RAP2.12.It is localized to the nucleus and acts as a transcriptional activator through the GCC-box. It has been identified as a suppressor of Bax-induced cell death b…	ETHYLENE-RESPONSIVE ELEMENT BINDING PROTEIN (EBP) RELATED TO AP2 3 (RAP2.3);ETHYLENE-RESPONSIVE ELEMENT BINDING PROTEIN (ATEBP);ETHYLENE RESPONSE FACTOR 72 (ERF72);ETHYLENE-RESPONSIVE ELEMENT BINDING PROTEIN (EBP)	biotic stimulus	UP
AT3G16860	COBRA-like protein 8 precursor;(source:Araport11)	COBRA-LIKE PROTEIN 8 PRECURSOR (COBL8) COBRA-LIKE PROTEIN 8 PRECURSOR (COBL8)	defence response, biotic stimulus	DOWN
AT3G19970	alpha/beta-Hydrolases superfamily protein;(source:Araport11)		defence response, biotic stimulus	DOWN
AT3G20770	Encodes EIN3 (ethylene-insensitive3), a nuclear transcription factor that initiates downstream transcriptional cascades for ethylene responses. EIN3 interacts with MYC2, MYC3 and MYC4 to inhibit jasmonate-induced expression of wound-responsive genes and herbivory-inducible genes, and plant defense against generalist herbivores.	ETHYLENE-INSENSITIVE3 (EIN3) ETHYLENE-INSENSITIVE3 (EIN3); (AtEIN3)	defence response, biotic stimulus	UP
AT3G21220	Encodes a mitogen-activated kinase kinase, dual specific protein kinase that is expressed in vegetative tissues and floral buds. Involved in innate immunity. This protein activates MPK3/MPK6 and early-defense genes redundantly with MKK4. In plants with both MKK5 and MKK4 levels reduced by RNAi plants, floral organs do not abscise suggesting a role for both proteins in mediating floral organ absci…	MAP KINASE KINASE 5 (MKK5) ARABIDOPSIS THALIANA MITOGEN-ACTIVATED PROTEIN KINASE KINASE 5 (ATMKK5); (ATMAP2K_ALPHA); (MAP2K_A);MAP KINASE KINASE 5 (MKK5);ARABIDOPSIS THALIANA MITOGEN-ACTIVATED PROTEIN KINASE KINASE 5 (ATMEK5);MAP KINASE KINASE 5 (MEK5)	defence response, biotic stimulus	DOWN
AT3G21700	Monomeric G protein. Expressed in root epidermal cells that are destined to become atrichoblasts. Also expressed during pollen development and in the pollen tube tip.	(SGP2) (SGP2)	defence response, biotic stimulus	DOWN
AT3G22231	Encodes a member of a novel 6 member Arabidopsis gene family. Expression of PCC1 is regulated by the circadian clock and is upregulated in response to both virulent and avirulent strains of Pseudomonas syringae pv. tomato.	PATHOGEN AND CIRCADIAN CONTROLLED 1 (PCC1) (PCM4);PATHOGEN AND CIRCADIAN CONTROLLED 1 (PCC1)	biotic stimulus	DOWN
AT3G22930	Encodes a calmodulin-like protein.	CALMODULIN-LIKE 11 (CML11) CALMODULIN-LIKE 11 (CML11); (ATCML11)	defence response, biotic stimulus	DOWN
AT3G25230	Encodes a a high molecular weight member of the FK506 binding protein (FKBP) family. It has three FKBP12-like domains, tetratricopeptide repeats, and a putative calmodulin binding domain. Modulates thermotolerance by interacting with HSP90.1 and affecting the accumulation of HsfA2-regulated sHSPs. Belongs to one of the 36 carboxylate clamp (CC)-tetratricopeptide repeat (TPR) proteins (Prasad 2010…	ROTAMASE FKBP 1 (ROF1) ROTAMASE FKBP 1 (ROF1); (ATFKBP62);FK506 BINDING PROTEIN 62 (FKBP62)	defence response	DOWN
AT3G25882	encodes a kinase that physically interacts with NPR1/NIM1	NIM1-INTERACTING 2 (NIMIN-2) NIM1-INTERACTING 2 (NIMIN-2)	defence response, biotic stimulus	DOWN
AT3G26220	cytochrome P450 monooxygenase	CYTOCHROME P450, FAMILY 71, SUBFAMILY B, POLYPEPTIDE 3 (CYP71B3) CYTOCHROME P450, FAMILY 71, SUBFAMILY B, POLYPEPTIDE 3 (CYP71B3)	defence response, biotic stimulus	UP
AT3G26230	putative cytochrome P450	CYTOCHROME P450, FAMILY 71, SUBFAMILY B, POLYPEPTIDE 24 (CYP71B24) CYTOCHROME P450, FAMILY 71, SUBFAMILY B, POLYPEPTIDE 24 (CYP71B24)	defence response, biotic stimulus	UP
AT3G27540	beta-1,4-N-acetylglucosaminyltransferase family protein;(source:Araport11)		defence response, biotic stimulus	DOWN
AT3G28740	Encodes a member of the cytochrome p450 family. Expression is upregulated in response to cis-jasmonate treatment. Overexpression induces synthesis of volatile compounds that affect chemical ecology and insect interactions.	CYTOCHROME P450, FAMILY 81, SUBFAMILY D, POLYPEPTIDE 11 (CYP81D11) CYTOCHROME P450, FAMILY 81, SUBFAMILY D, POLYPEPTIDE 11 (CYP81D11)	defence response, biotic stimulus	DOWN
AT3G29250	NAD(P)-binding Rossmann-fold superfamily protein;(source:Araport11)	SHORT-CHAIN DEHYDROGENASE REDUCTASE 4 (SDR4) SHORT-CHAIN DEHYDROGENASE REDUCTASE 4 (SDR4); (ATSDR4)	defence response, biotic stimulus	DOWN
AT3G43850	hypothetical protein;(source:Araport11)		defence response, biotic stimulus	UP
AT3G44720	Encodes a plastid-localized arogenate dehydratase involved in phenylalanine biosynthesis. Not less than six genes encoding ADT were identi&#64257;ed in the Arabidopsis genome: ADT1 [At1g11790]; ADT2 [At3g07630]; ADT3 [At2g27820]; ADT4 [At3g44720]; ADT5 [At5g22630]; and ADT6 [At1g08250]. The mRNA is cell-to-cell mobile.	AROGENATE DEHYDRATASE 4 (ADT4) AROGENATE DEHYDRATASE 4 (ADT4)	defence response	UP
AT3G45240	Encodes a geminivirus Rep interacting kinase (GRIK; GRIK1/AT3G45240, GRIK2/AT5G60550). GRIKs are SnRK1 (SNF1-related kinases) activating kinases. Both GRIKs specifically bind to the SnRK1 catalytic subunit and phosphorylate the equivalent threonine residue in its activation loop in vitro. Involved in resistance to S. sclerotiorum, fungal sRNA target.	GEMINIVIRUS REP INTERACTING KINASE 1 (GRIK1) GEMINIVIRUS REP INTERACTING KINASE 1 (GRIK1); (ATSNAK2)	biotic stimulus	DOWN
AT3G45440	Concanavalin A-like lectin protein kinase family protein;(source:Araport11)		defence response, biotic stimulus	DOWN
AT3G46280	kinase-like protein;(source:Araport11)		defence response, biotic stimulus	DOWN
AT3G46510	Encodes a protein containing a UND, a U-box, and an ARM domain. This protein has E3 ubiquitin ligase activity based on in vitro assays. Can be phosphorylated in vitro by MLPK, ARK1, and ARK2 but not by SD1-29. Involved in ubiquitination of pattern recognition receptor FLS2.	PLANT U-BOX 13 (PUB13) PLANT U-BOX 13 (PUB13);ARABIDOPSIS THALIANA PLANT U-BOX 13 (ATPUB13)	defence response, biotic stimulus	UP
AT3G47250	transmembrane protein, putative (DUF247);(source:Araport11)		defence response, biotic stimulus	UP
AT3G47820	Plant U-box type E3 ubiquitin ligase (PUB).	PLANT U-BOX 39 (PUB39) PLANT U-BOX 39 (PUB39)	defence response, biotic stimulus	UP
AT3G48090	Component of R gene-mediated disease resistance in Arabidopsis thaliana with homology to eukaryotic lipases.	ENHANCED DISEASE SUSCEPTIBILITY 1 (EDS1) (ATEDS1);ENHANCED DISEASE SUSCEPTIBILITY 1 (EDS1)	defence response, biotic stimulus	DOWN
AT3G48520	CYP94B3 is a jasmonoyl-isoleucine-12-hydroxylase that catalyzes the formation of 12-OH-JA-Ile from JA-Ile. By reducing the levels of this the biologically active phytohormone, CYP94B3 attenuates the jasmonic acid signaling cascade. CYP94B3 transcript levels rise in response to wounding.	CYTOCHROME P450, FAMILY 94, SUBFAMILY B, POLYPEPTIDE 3 (CYP94B3) CYTOCHROME P450, FAMILY 94, SUBFAMILY B, POLYPEPTIDE 3 (CYP94B3)	defence response, biotic stimulus	DOWN
AT3G48580	Encodes a cell-wall localized xyloglucan endotransglucosylase/hydrolase.	XYLOGLUCAN ENDOTRANSGLUCOSYLASE/HYDROLASE 11 (XTH11) XYLOGLUCAN ENDOTRANSGLUCOSYLASE/HYDROLASE 11 (XTH11)	defence response, biotic stimulus	DOWN
AT3G48690	Encodes a protein with carboxylesterase whose activity was tested using both pNA and 2,4-D-methyl.	(CXE12) ARABIDOPSIS THALIANA CARBOXYESTERASE 12 (AtCXE12); (CXE12)	defence response	UP
AT3G48990	Encodes an oxalyl-CoA synthetase and is required for oxalate degradation, for normal seed development, and for defense against an oxalate-producing fungal pathogen.	ACYL-ACTIVATING ENZYME 3 (AAE3) ACYL-ACTIVATING ENZYME 3 (AAE3)	defence response, biotic stimulus	UP
AT3G49790	Carbohydrate-binding protein;(source:Araport11)		defence response, biotic stimulus	UP
AT3G50260	Encodes a member of the DREB subfamily A-5 of ERF/AP2 transcription factor family. The protein contains one AP2 domain. Involved in defense and freezing stress responses. There are 16 members in this subfamily including RAP2.1, RAP2.9 and RAP2.10. The mRNA is cell-to-cell mobile.	COOPERATIVELY REGULATED BY ETHYLENE AND JASMONATE 1 (CEJ1) (ATERF#011);DREB AND EAR MOTIF PROTEIN 1 (DEAR1);COOPERATIVELY REGULATED BY ETHYLENE AND JASMONATE 1 (CEJ1)	defence response, biotic stimulus	UP
AT3G50900	hypothetical protein;(source:Araport11)		defence response, biotic stimulus	DOWN
AT3G52060	Encodes a plasmodesmal glycosyltransferase-like protein. Mutation results in defects in seed germination and delayed plant growth.	BETA-1,6-N-ACETYLGLUCOSAMINYL TRANSFERASE-LIKE (GNTL) (ATGNTL);BETA-1,6-N-ACETYLGLUCOSAMINYL TRANSFERASE-LIKE (GNTL)	biotic stimulus	UP
AT3G52400	syntaxin protein, involved in the negative regulation of defense pathways such as programmed cell death, salicylic acid signalling pathway, jasmonic acid signalling pathway	SYNTAXIN OF PLANTS 122 (SYP122) SYNTAXIN OF PLANTS 122 (SYP122); (ATSYP122)	defence response, biotic stimulus	UP
AT3G53260	Encodes phenylalanine lyase. Arabidopsis has four PALs: AT2G37040 (PAL1), AT3G53260 (PAL2), AT5G04230 (PAL3) and AT3G10340 (PAL4).	PHENYLALANINE AMMONIA-LYASE 2 (PAL2) (ATPAL2);PHENYLALANINE AMMONIA-LYASE 2 (PAL2)	defence response	DOWN
AT3G54420	encodes an EP3 chitinase that is expressed during somatic embryogenesis in 'nursing' cells surrounding the embryos but not in embryos themselves. The gene is also expressed in mature pollen and growing pollen tubes until they enter the receptive synergid, but not in endosperm and integuments as in carrot. Post-embryonically, expression is found in hydathodes, stipules, root epidermis and emerging…	HOMOLOG OF CARROT EP3-3 CHITINASE (EP3) HOMOLOG OF CARROT EP3-3 CHITINASE (EP3);CHITINASE CLASS IV (ATCHITIV);HOMOLOG OF CARROT EP3-3 CHITINASE (ATEP3); (CHIV)	defence response, biotic stimulus	DOWN
AT3G56050	Protein kinase family protein;(source:Araport11)		defence response, biotic stimulus	UP
AT3G56710	Sig1 binding protein; interacts with Sig1R4. As well as Sig1, SibI is imported into chloroplasts and its expression is light-dependent in mature chloroplasts.	SIGMA FACTOR BINDING PROTEIN 1 (SIB1) SIGMA FACTOR BINDING PROTEIN 1 (SIB1)	defence response, biotic stimulus	UP
AT3G60190	At3g60190 encodes Arabidopsis dynamin-related protein 1E, DRP1E, also known as EDR3, ADL4 and ADL1E, which is 624 amino acid residues long, has a predicted mass of 69.8 kDa and a pI of 7.5. Dynamin-related protein 1E belongs to a plant-specific subclass of dynamin-related proteins (DRP1), consisting of five members in Arabidopsis (A, B, C, D, E). This class is characterized by having an N-termina…	DYNAMIN-LIKE 1E (DL1E) DYNAMIN-LIKE 1E (DL1E);ARABIDOPSIS DYNAMIN-LIKE 4 (ADL4);ENHANCED DISEASE RESISTANCE 3 (EDR3);DYNAMIN-LIKE PROTEIN 2 (ADLP2);DYNAMIN-RELATED PROTEIN 1E (DRP1E);DYNAMIN-LIKE 1E (ADL1E)	defence response, biotic stimulus	UP
AT3G61190	Encodes a protein with a C2 domain that binds to BON1 in yeast two hybrid analyses. Its ability to bind to phospholipids is enhanced by calcium ions. Involved in maintaining cell homeostasis.	BON ASSOCIATION PROTEIN 1 (BAP1) BON ASSOCIATION PROTEIN 1 (BAP1)	defence response	DOWN
AT3G61260	Lipid raft regulatory protein, crucial for plasma membrane nanodomain assembly to control plasmodesmata aperture and functionality. Negatively regulates the cell-to-cell movement of TuMV via competition with PCaP1 for binding actin filaments.	REMORIN 1.2 (REM1.2) REMORIN 1.2 (REM1.2)	defence response, biotic stimulus	UP
AT3G62660	Encodes a protein with putative galacturonosyltransferase activity.	GALACTURONOSYLTRANSFERASE-LIKE 7 (GATL7) GALACTURONOSYLTRANSFERASE-LIKE 7 (GATL7)	defence response, biotic stimulus	UP
AT3G62770	Required for autophagosome formation during nutrient deprivation and senescence, promotes pexophagy during seedling development.	AUTOPHAGY 18A (ATG18a) PEROXISOME UNUSUAL POSITIONING 2 (PEUP2);AUTOPHAGY 18A (AtATG18a);AUTOPHAGY 18A (ATG18a)	defence response, biotic stimulus	UP
AT3G62780	Calcium-dependent lipid-binding (CaLB domain) family protein;(source:Araport11)		defence response	UP
AT4G00860	putative pathogenesis-related protein whose transcript level is induced in response to ozone and pathogenic Pseudomonas strains.	(ATOZI1) (ATOZI1);ARABIDOPSIS THALIANA OZONE-INDUCED PROTEIN 1 (AT0ZI1)	biotic stimulus	DOWN
AT4G01080	Encodes a member of the TBL (TRICHOME BIREFRINGENCE-LIKE) gene family containing a plant-specific DUF231 (domain of unknown function) domain. TBL gene family has 46 members, two of which (TBR/AT5G06700 and TBL3/AT5G01360) have been shown to be involved in the synthesis and deposition of secondary wall cellulose, presumably by influencing the esterification state of pectic polymers. Functions as a…	TRICHOME BIREFRINGENCE-LIKE 26 (TBL26) TRICHOME BIREFRINGENCE-LIKE 26 (TBL26);MANNAN O-ACETYLTRANSFERASE 4 (MOAT4)	defence response	DOWN
AT4G02360	DUF538 domain protein , tandemly repeated with AT4G02370 (ASD4). Expression is induced by ABA and promoter contains ABA response elements. Mutants show decreased sensitivity to ABA.		defence response, biotic stimulus	UP
AT4G02380	Encodes AtLEA5 (late embryogenesis abundant like protein). Also known as SENESCENCE-ASSOCIATED GENE 21 (SAG21). Has a role on oxidative stress tolerance. mRNA levels are elevated in response to various stresses.	SENESCENCE-ASSOCIATED GENE 21 (SAG21) SENESCENCE-ASSOCIATED GENE 21 (SAG21);ARABIDOPSIS THALIANA LATE EMBRYOGENENSIS ABUNDANT LIKE 5 (AtLEA5);LATE EMBRYOGENESIS ABUNDANT 38 (LEA38); (LEA5)	biotic stimulus	UP
AT4G08230	glycine-rich protein;(source:Araport11)		defence response, biotic stimulus	DOWN
AT4G10610	RNA-binding protein, putative. Member of a family of proteins having an PABC binding domain (PAM motif).	CTC-INTERACTING DOMAIN 12 (CID12) (ATRBP37);CTC-INTERACTING DOMAIN 12 (CID12);RNA-BINDING PROTEIN 37 (RBP37)	defence response, biotic stimulus	UP
AT4G11300	ROH1, putative (DUF793);(source:Araport11)		defence response, biotic stimulus	UP
AT4G12735	Encodes a peroxisomal protein.		defence response, biotic stimulus	UP
AT4G14640	encodes a divergent member of calmodulin, which is an EF-hand family of Ca2+-binding proteins. This gene is expressed in leaves, flowers and siliques. The gene functionally complements yeast calmodulin 1 (CAM1). Also the protein does not form formed a complex with a basic amphiphilic helical peptide in the presence of Ca2+ in vitro. Authors suggest that this gene may represent a Ca2+-binding sens…	CALMODULIN 8 (CAM8) CALMODULIN 8 (CAM8);CALMODULIN-LIKE 8 (AtCML8); (CML8)	biotic stimulus	DOWN
AT4G15610	Uncharacterized protein family (UPF0497);(source:Araport11)	CASP-LIKE PROTEIN 1D1 (CASPL1D1) CASP-LIKE PROTEIN 1D1 (CASPL1D1)	defence response, biotic stimulus	DOWN
AT4G15760	Encodes a protein with similarity to monooxygenases that are known to degrade salicylic acid (SA).	MONOOXYGENASE 1 (MO1) MONOOXYGENASE 1 (MO1)	biotic stimulus	UP
AT4G15800	Member of a diversely expressed predicted peptide family showing sequence similarity to tobacco Rapid Alkalinization Factor (RALF), and is believed to play an essential role in the physiology of Arabidopsis. Consists of a single exon and is characterized by a conserved C-terminal motif and N-terminal signal peptide. The mRNA is cell-to-cell mobile.	RALF-LIKE 33 (RALFL33) RALF-LIKE 33 (RALFL33); (RALF33)	defence response, biotic stimulus	DOWN
AT4G17490	Encodes a member of the ERF (ethylene response factor) subfamily B-3 of ERF/AP2 transcription factor family (ATERF-6). The protein contains one AP2 domain. There are 18 members in this subfamily including ATERF-1, ATERF-2, AND ATERF-5. It is involved in the response to reactive oxygen species and light stress. Involved in regulating root architecture and the response to cold stress.	ETHYLENE RESPONSIVE ELEMENT BINDING FACTOR 6 (ERF6) ETHYLENE RESPONSIVE ELEMENT BINDING FACTOR 6 (ATERF6); (ERF-6-6);ETHYLENE RESPONSIVE ELEMENT BINDING FACTOR 6 (ERF6); (ERF103)	biotic stimulus	DOWN
AT4G17880	MYC4 is bHLH transcriptional regulator. It functions as a JAZ-interacting transcription factor that acts together with MYC2 and MYC3 to activate JA-responses. It also functions in blue light mediated secondary cell wall biogenesis via regulation of NST1 expression. MYC4 directly binds to NST1 promoter and activates its expression.	(MYC4) (MYC4)	defence response	DOWN
AT4G17900	PLATZ transcription factor family protein;(source:Araport11)	(PLATZ11) (PLATZ11)	biotic stimulus	UP
AT4G19520	disease resistance protein (TIR-NBS-LRR class) family;(source:Araport11)		defence response	DOWN
AT4G20970	basic helix-loop-helix (bHLH) DNA-binding superfamily protein;(source:Araport11)		defence response, biotic stimulus	DOWN
AT4G22470	Encodes a hybrid proline-rich protein that contains two tandem PRD-8CMs (proline-rich domain-eight cysteine motif). Its expression is induced by JA and certain pathogens. This pattern of induction, combined with overexpression and RNAi induced phenotypes, suggests involvement in defense response to pathogens.	DOUBLE HYBRID PROLINE-RICH PROTEIN 1 (DHYPRP1) DOUBLE HYBRID PROLINE-RICH PROTEIN 1 (DHYPRP1); (ATDHYPRP1)	defence response, biotic stimulus	DOWN
AT4G23140	Arabidopsis thaliana receptor-like protein kinase. Naming convention from Chen et al 2003 (PMID 14756307)	CYSTEINE-RICH RLK (RECEPTOR-LIKE PROTEIN KINASE) 6 (CRK6) CYSTEINE-RICH RLK (RECEPTOR-LIKE PROTEIN KINASE) 6 (CRK6)	defence response, biotic stimulus	DOWN
AT4G23250	cysteine-rich receptor-like protein kinase 17;(source:Araport11)	EMBRYO DEFECTIVE 1290 (emb1290) EMBRYO DEFECTIVE 1290 (emb1290)	defence response, biotic stimulus	DOWN
AT4G23530	ROH1, putative (DUF793);(source:Araport11)		defence response, biotic stimulus	UP
AT4G25050	Encodes an plastid acyl carrier protein predominantly expressed in leaves. Gene expression is upregulated by light.	ACYL CARRIER PROTEIN 4 (ACP4) ACYL CARRIER PROTEIN 4 (ACP4); (ATACP4)	defence response, biotic stimulus	UP
AT4G26070	Member of MAP Kinase Kinase. Likely functions in a stress-activated MAPK pathway. Can phosphorylate the MAPK AtMPK4, in response to stress. Gets phosphorylated by MEKK1 in response to wounding.	MAP KINASE/ ERK KINASE 1 (MEK1) (ATMEK1);MITOGEN ACTIVATED PROTEIN KINASE KINASE 1 (MKK1);MAP KINASE/ ERK KINASE 1 (MEK1); (NMAPKK)	defence response, biotic stimulus	UP
AT4G27320	Contains a universal stress protein domain. Protein is phosphorylated in response to Phytophthora infestans zoospores and xylanase.	(PHOS34) (ATPHOS34); (PHOS34); (USP21)	biotic stimulus	UP
AT4G27990	One of four Arabidopsis homologs of bacterial ymlg proteins.	(YLMG1-2) (YLMG1-2); (ATYLMG1-2)	defence response	UP
AT4G28300	Encodes a protein with 13.6% proline amino acids that is predicted to localize to the cell wall. The mRNA is cell-to-cell mobile.	FLOE1 (FLOE1) FLOE1 (FLOE1)	defence response, biotic stimulus	UP
AT4G30230	hypothetical protein;(source:Araport11)		defence response, biotic stimulus	UP
AT4G31500	Encodes an oxime-metabolizing enzyme in the biosynthetic pathway of glucosinolates. Is required for phytochrome signal transduction in red light. Mutation confers auxin overproduction.	CYTOCHROME P450, FAMILY 83, SUBFAMILY B, POLYPEPTIDE 1 (CYP83B1) CYTOCHROME P450, FAMILY 83, SUBFAMILY B, POLYPEPTIDE 1 (CYP83B1);SUPERROOT 2 (SUR2);RUNT 1 (RNT1);RED ELONGATED 1 (RED1);ALTERED TRYPTOPHAN REGULATION 4 (ATR4); (REF5)	defence response, biotic stimulus	UP
AT4G31800	Pathogen-induced transcription factor. Binds W-box sequences in vitro. Forms protein complexes with itself and with WRKY40 and WRKY60. Constitutive expression of WRKY18 enhanced resistance to P. syringae, but its coexpression with WRKY40 or WRKY60 made plants more susceptible to both P. syringae and B. cinerea. WRKY18, WRKY40, and WRKY60 have partially redundant roles in response to the hemibiotr…	WRKY DNA-BINDING PROTEIN 18 (WRKY18) WRKY DNA-BINDING PROTEIN 18 (WRKY18);ARABIDOPSIS THALIANA WRKY DNA-BINDING PROTEIN 18 (ATWRKY18)	defence response, biotic stimulus	DOWN
AT4G31970	Functions in the biosynthesis of 4-hydroxy indole-3-carbonyl nitrile (4-OH-ICN), a cyanogenic phytoalexin in Arabidopsis. CYP82C2 acts as a hydroxylase on indole-3-carbonyl nitrile to generate 4-OH-ICN.	CYTOCHROME P450, FAMILY 82, SUBFAMILY C, POLYPEPTIDE 2 (CYP82C2) CYTOCHROME P450, FAMILY 82, SUBFAMILY C, POLYPEPTIDE 2 (CYP82C2)	defence response, biotic stimulus	DOWN
AT4G33666	hypothetical protein;(source:Araport11)		defence response, biotic stimulus	UP
AT4G33925	Encodes SSN2 (suppressor of sni1 2), a suppressor of SNI1 (AT4G18470). SSN2 contains a SWIM (SWI2/SNF2 and MuDR) domain found in a variety of prokaryotic and eukaryotic proteins. Involved in plant immune response and homologous recombination.	SUPPRESSOR OF SNI1 2 (SSN2) SUPPRESSOR OF SNI1 2 (SSN2)	defence response, biotic stimulus	UP
AT4G33950	Encodes calcium-independent ABA-activated protein kinase, a member of SNF1-related protein kinases (SnRK2) whose activity is activated by ionic (salt) and non-ionic (mannitol) osmotic stress. Mutations disrupted ABA induction of stomatal closure as well as ABA inhibition of light-induced stomatal opening. However, regulation of stomatal opening/closing by light or CO(2) is not affected in these m…	OPEN STOMATA 1 (OST1) OPEN STOMATA 1 (OST1);SUCROSE NONFERMENTING 1-RELATED PROTEIN KINASE 2-6 (SNRK2-6); (SRK2E);SNF1-RELATED PROTEIN KINASE 2.6 (SNRK2.6); (P44);OPEN STOMATA 1 (ATOST1)	defence response, biotic stimulus	DOWN
AT4G34950	Major facilitator superfamily protein;(source:Araport11)	MAJOR FACILITATOR SUPERFAMILY 1 (MFS1) MAJOR FACILITATOR SUPERFAMILY 1 (MFS1)	defence response, biotic stimulus	DOWN
AT4G36430	Peroxidase superfamily protein;(source:Araport11)		biotic stimulus	DOWN
AT4G36670	Major facilitator superfamily protein;(source:Araport11)	POLYOL/MONOSACCHARIDE TRANSPORTER 6 (PMT6) (AtPLT6); (AtPMT6);POLYOL TRANSPORTER 6 (PLT6);POLYOL/MONOSACCHARIDE TRANSPORTER 6 (PMT6)	defence response, biotic stimulus	UP
AT4G37530	Peroxidase superfamily protein;(source:Araport11)		defence response, biotic stimulus	DOWN
AT4G37670	N-acetyl-l-glutamate synthase 2;(source:Araport11)	N-ACETYL-L-GLUTAMATE SYNTHASE 2 (NAGS2) N-ACETYL-L-GLUTAMATE SYNTHASE 2 (NAGS2)	defence response, biotic stimulus	DOWN
AT4G37690	Unlike its close paralog MUCI10 (At2g22900), GT6 is not required for the biosynthesis of seed coat mucilage. GT6 is preferentially expressed in sub-epidermal cell layers of the seed coat.	GLYCOSYLTRANSFERASE 6 (GT6) GLYCOSYLTRANSFERASE 6 (GT6)	defence response, biotic stimulus	UP
AT4G37980	NADPH-dependent cinnamaldehyde and hexenal reductase involved in the production of green leaf volitile compounds.	ELICITOR-ACTIVATED GENE 3-1 (ELI3-1) ELICITOR-ACTIVATED GENE 3-1 (ELI3-1);ELICITOR-ACTIVATED GENE 3 (ELI3); (ATCAD7);CINNAMYL-ALCOHOL DEHYDROGENASE 7 (CAD7);CINNAMALDEHYDE AND HEXENAL REDUCTASE (CHR)	defence response, biotic stimulus	UP
AT4G37990	Encodes an aromatic alcohol:NADP+ oxidoreductase whose mRNA levels are increased in response to treatment with a variety of phytopathogenic bacteria. Though similar to mannitol dehydrogenases, this enzyme does not have mannitol dehydrogenase activity.	ELICITOR-ACTIVATED GENE 3-2 (ELI3-2) ELICITOR-ACTIVATED GENE 3-2 (ELI3-2);ELICITOR-ACTIVATED GENE 3 (ELI3);ARABIDOPSIS THALIANA CINNAMYL-ALCOHOL DEHYDROGENASE 8 (ATCAD8);CINNAMYL-ALCOHOL DEHYDROGENASE B2 (CAD-B2)	defence response, biotic stimulus	DOWN
AT4G38550	phospholipase-like protein (PEARLI 4) family protein;(source:Araport11)		defence response, biotic stimulus	UP
AT4G39090	Similar to cysteine proteinases, induced by desiccation but not abscisic acid. Required for RRS1-R mediated resistance against Ralstonia solanacearum. Interacts with the R. solanacearum type III effector PopP2. RD19 associates with PopP2 to form a nuclear complex that is required for activation of the RRS1-R?mediated resistance response.	RESPONSIVE TO DEHYDRATION 19 (RD19) RESPONSIVE TO DEHYDRATION 19 (RD19);RESPONSIVE TO DEHYDRATION 19A (RD19A)	defence response, biotic stimulus	UP
AT5G01540	Encodes LecRKA4.1, a member of the lectin receptor kinase subfamily A4 (LecRKA4.1 At5g01540; LecRKA4.2 At5g01550; LecRKA4.3 At5g01560). Together with other members of the subfamily, functions redundantly in the negative regulation of ABA response in seed germination. Positively regulates pattern-triggered immunity.	L-TYPE LECTIN RECEPTOR KINASE-VI.2 (LECRK-VI.2) L-TYPE LECTIN RECEPTOR KINASE-VI.2 (LECRK-VI.2);LECTIN RECEPTOR KINASE A4.1 (LECRKA4.1)	defence response, biotic stimulus	DOWN
AT5G01750	LURP-one-like protein (DUF567);(source:Araport11)		defence response, biotic stimulus	UP
AT5G02290	Encodes a candidate protein kinase NAK that is similar to the oncogenes met and abl.	(NAK) PBS1-LIKE 11 (PBL11); (NAK)	defence response, biotic stimulus	UP
AT5G02490	Member of the cytosolic heat shock 70 protein family.	(Hsp70-2) (Hsp70-2); (AtHsp70-2)	biotic stimulus	DOWN
AT5G03490	Encodes a dihydroxybenzoic acid (DHBA) glycosyltransferase. The Col-0 enzyme is responsible for biosynthesis of 2,3-DHBA xyloside and 2,5-DHBA xyloside. The Col-0 enzyme is specific for UDP-xylose and the C24 enzyme uses both UDP-glucose and UDP-xylose. This difference in sugar donor specificity was shown to be largely due to a single amino acid change between the two isoforms.	UDP GLYCOSYLTRANSFERASE 89A2 (UGT89A2) UDP GLYCOSYLTRANSFERASE 89A2 (UGT89A2)	defence response, biotic stimulus	UP
AT5G04230	Member of Phenylalanine ammonialyase (PAL) gene family. Differs significantly from PAL1 and PAL2 and other sequenced plant PAL genes. Arabidopsis has four PALs: AT2G37040 (PAL1), AT3G53260 (PAL2), AT5G04230 (PAL3) and AT3G10340 (PAL4).	PHENYL ALANINE AMMONIA-LYASE 3 (PAL3) PHENYL ALANINE AMMONIA-LYASE 3 (PAL3)	defence response	UP
AT5G04720	Encodes a member of the ADR1 family nucleotide-binding leucine-rich repeat (NB-LRR) immune receptors. The mRNA is cell-to-cell mobile.	ADR1-LIKE 2 (ADR1-L2) PHOENIX 21 (PHX21);ADR1-LIKE 2 (ADR1-L2)	defence response, biotic stimulus	UP
AT5G05960	Involved in adventitious root organogenesis.		defence response, biotic stimulus	UP
AT5G08240	transmembrane protein;(source:Araport11)		defence response, biotic stimulus	UP
AT5G08790	induced by wounding, belongs to a large family of putative transcriptional activators with NAC domain.	(ATAF2) ARABIDOPSIS NAC DOMAIN CONTAINING PROTEIN 81 (anac081); (ATAF2)	biotic stimulus	UP
AT5G10380	Encodes a RING finger domain protein with E3 ligase activity that is localized to the lipid rafts of the plasma membrane. Expression is increased in response to fungal pathogen. May be involved in regulation of programmed cell death by facilitating degredation of regulation of PDC activators. The mRNA is cell-to-cell mobile.	(RING1) (RING1); (ATRING1);ARABIDOPSIS T??XICOS EN LEVADURA 55 (ATL55)	biotic stimulus	UP
AT5G10600	member of CYP81K	CYTOCHROME P450, FAMILY 81, SUBFAMILY K, POLYPEPTIDE 2 (CYP81K2) CYTOCHROME P450, FAMILY 81, SUBFAMILY K, POLYPEPTIDE 2 (CYP81K2)	defence response, biotic stimulus	UP
AT5G10770	Eukaryotic aspartyl protease family protein;(source:Araport11)		defence response, biotic stimulus	DOWN
AT5G11930	Encodes a member of the CC-type glutaredoxin (ROXY) family that has been shown to interact with the transcription factor TGA2.	(ROXY20) (ROXY20)	biotic stimulus	DOWN
AT5G12340	PADRE protein up-regulated after infection by S. sclerotiorum.		biotic stimulus	DOWN
AT5G13010	Encodes a nuclear localized DEAH-box containing protein that is involved in miRNA biogenesis. Loss of function mutants are embryo lethal. Gene silencing experiments demonstrated its role in the localization of DCL-1 and HYL1 to the nuclear D-body. In silenced lines, miRNA production is suppressed and plants have developmental abnormalities and are hypersensitive to fungal pathogens.	EMBRYO DEFECTIVE 3011 (EMB3011) HOMOLOG IN YEAST PRP16 (PRP16);PSR1-INTERACTING PROTEIN 1 (PINP1);EMBRYO DEFECTIVE 3011 (EMB3011);FOREVER YOUNG (FEY);CLUMSY VEIN (CUV)	defence response, biotic stimulus	UP
AT5G13090	Reactive oxygen species (ROS) scavenger; differentially expressed in ovules of salt stressed plants; T-DNA mutants have 140% increase in seed failure.	(PER17) (PER17)	defence response, biotic stimulus	UP
AT5G13740	Encodes ZIF1 (ZINC-INDUCED FACILITATOR1), a member of the Major Facilitator Superfamily (MFS) of membrane proteins which are found in all organisms and transport a wide range of small, organic molecules. Involved in a mechanism of Zn sequestration, possibly by transport of a Zn ligand or Zn-ligand complex into vacuoles. The mRNA is cell-to-cell mobile.	ZINC INDUCED FACILITATOR 1 (ZIF1) ZINC INDUCED FACILITATOR 1 (ZIF1)	biotic stimulus	UP
AT5G16030	mental retardation GTPase activating protein;(source:Araport11)		biotic stimulus	UP
AT5G16190	encodes a gene similar to cellulose synthase		biotic stimulus	DOWN
AT5G16370	acyl activating enzyme 5;(source:Araport11)	ACYL ACTIVATING ENZYME 5 (AAE5) ACYL ACTIVATING ENZYME 5 (AAE5)	biotic stimulus	UP
AT5G18270	NAC domain containing protein 87;(source:Araport11)	ARABIDOPSIS NAC DOMAIN CONTAINING PROTEIN 87 (ANAC087) ARABIDOPSIS NAC DOMAIN CONTAINING PROTEIN 87 (ANAC087)	defence response, biotic stimulus	DOWN
AT5G18350	Disease resistance protein (TIR-NBS-LRR class) family;(source:Araport11)		defence response	UP
AT5G18490	vacuolar sorting-associated protein (DUF946);(source:Araport11)		defence response, biotic stimulus	UP
AT5G19250	Glycoprotein membrane precursor GPI-anchored;(source:Araport11)		defence response, biotic stimulus	UP
AT5G20380	Encodes an inorganic phosphate transporter (PHT4;5).		defence response	UP
AT5G20790	transmembrane protein;(source:Araport11)		defence response, biotic stimulus	DOWN
AT5G21105	Putative ascorbate oxidase with ferroxidase activity, candidate for the regulation of apoplastic iron excess.	(MCO3) (MCO3)	defence response, biotic stimulus	DOWN
AT5G22290	Encodes ANAC089, a membrane-tethered transcription factor that negatively regulates floral initiation. Also controls ER-stress-induced programmed cell death.	NAC DOMAIN CONTAINING PROTEIN 89 (NAC089) NAC DOMAIN CONTAINING PROTEIN 89 (anac089);NTM1-LIKE 14 (NTL14);FRUCTOSE-SENSING QUANTITATIVE TRAIT LOCUS 6 (FSQ6);NAC DOMAIN CONTAINING PROTEIN 89 (NAC089)	defence response, biotic stimulus	UP
AT5G22630	Encodes a plastid-localized arogenate dehydratase involved in phenylalanine biosynthesis. Not less than six genes encoding ADT were identi&#64257;ed in the Arabidopsis genome: ADT1 [At1g11790]; ADT2 [At3g07630]; ADT3 [At2g27820]; ADT4 [At3g44720]; ADT5 [At5g22630]; and ADT6 [At1g08250]. The mRNA is cell-to-cell mobile.	AROGENATE DEHYDRATASE 5 (ADT5) AROGENATE DEHYDRATASE 5 (ADT5)	defence response	UP
AT5G24770	Has acid phosphatase activity dependent on the presence of divalent cations (Mg2+, Co2+, Zn2+, Mn2+) and anti-insect activity. Insects fed with the protein show a retarded development. Induced in response to abscisic acid, jasmonic acid, salt, water deficiency and wounding.	VEGETATIVE STORAGE PROTEIN 2 (VSP2) (ATVSP2);VEGETATIVE STORAGE PROTEIN 2 (VSP2)	defence response, biotic stimulus	DOWN
AT5G24810	Increased tendency to retain introns in smeb mutants under normal or chilling stress condition.	(ABC1K11) (ABC1K11)	defence response, biotic stimulus	DOWN
AT5G25140	putative cytochrome P450	CYTOCHROME P450, FAMILY 71, SUBFAMILY B, POLYPEPTIDE 13 (CYP71B13) CYTOCHROME P450, FAMILY 71, SUBFAMILY B, POLYPEPTIDE 13 (CYP71B13)	defence response, biotic stimulus	DOWN
AT5G25280	serine-rich protein-like protein;(source:Araport11)		defence response, biotic stimulus	UP
AT5G26920	Encodes a calmodulin-binding protein CBP60g (calmodulin binding protein 60-like.g). The calmodulin-binding domain is located near the N-terminus; calmodulin binding is dependent on Ca(2+). Inducible by both bacterial pathogen and MAMP (microbe-associated molecular pattern) treatments. Bacterial growth is enhanced in cbp60g mutants. cbp60g mutants also show defects in salicylic acid (SA) accumulat…	CAM-BINDING PROTEIN 60-LIKE G (CBP60G) CAM-BINDING PROTEIN 60-LIKE G (CBP60G)	defence response, biotic stimulus	UP
AT5G27420	Encodes CNI1 (Carbon/Nitrogen Insensitive1) (also named as ATL31), a RING type ubiquitin ligase that functions in the Carbon/Nitrogen response for growth phase transition in Arabidopsis seedlings. The mRNA is cell-to-cell mobile.	CARBON/NITROGEN INSENSITIVE 1 (CNI1) CARBON/NITROGEN INSENSITIVE 1 (CNI1);ARABIDOPSIS TOXICOS EN LEVADURA 31 (ATL31)	defence response, biotic stimulus	UP
AT5G35620	Cap-binding protein, binds to the 5' cap structure of nuclear-encoded mRNAs. Mutant is resistant to potyvirus infection.	LOSS OF SUSCEPTIBILITY TO POTYVIRUS 1 (LSP1) LOSS OF SUSCEPTIBILITY TO POTYVIRUS 1 (LSP1);EUKARYOTIC INITIATION FACTOR (ISO)4E (EIF(ISO)4E);EUKARYOTIC TRANSLATION INITIATION FACTOR ISOFORM 4E (eIFiso4E);EUKARYOTIC TRANSLATION INITATION FACTOR 4E2 (EIF4E2); (LSP)	biotic stimulus	DOWN
AT5G37260	Encodes a MYB family transcription factor Circadian 1 (CIR1). Involved in circadian regulation in Arabidopsis.	REVEILLE 2 (RVE2) REVEILLE 2 (RVE2);CIRCADIAN 1 (CIR1)	biotic stimulus	DOWN
AT5G40590	Cysteine/Histidine-rich C1 domain family protein;(source:Araport11)		defence response, biotic stimulus	DOWN
AT5G40990	Component of plant resistance. Contains lipase signature motif and GDSL domain. Directly interferes with the fungal infection process by acting on fungal cell walls through its action as a antimicrobial compound. Critical component for both local and systemic resistance responses in the incompatible interaction with Alternaria brassicicola in the ethylene-dependent pathway.	GDSL LIPASE 1 (GLIP1) GDSL LIPASE 1 (GLIP1)	defence response, biotic stimulus	UP
AT5G42440	Protein kinase superfamily protein;(source:Araport11)		defence response, biotic stimulus	UP
AT5G43580	Predicted to encode a PR (pathogenesis-related) peptide that belongs to the PR-6 proteinase inhibitor family. Functions in resistance to necrotrophic fungi and insect herbivory. Six putative PR-6-type protein encoding genes are found in Arabidopsis: At2g38900, At2g38870, At5g43570, At5g43580, At3g50020 and At3g46860.	UNUSUAL SERINE PROTEASE INHIBITOR (UPI) UNUSUAL SERINE PROTEASE INHIBITOR (UPI)	defence response, biotic stimulus	DOWN
AT5G44390	FAD-binding Berberine family protein;(source:Araport11)	(ATBBE25) (ATBBE25)	defence response, biotic stimulus	DOWN
AT5G46330	Encodes a leucine-rich repeat serine/threonine protein kinase that is expressed ubiquitously. FLS2 is involved in MAP kinase signalling relay involved in innate immunity. Essential in the perception of flagellin, a potent elicitor of the defense response. FLS2 is directed for degradation by the bacterial ubiquitin ligase AvrPtoB. The mRNA is cell-to-cell mobile.	FLAGELLIN-SENSITIVE 2 (FLS2) FLAGELLIN-SENSITIVE 2 (FLS2)	defence response, biotic stimulus	UP
AT5G49520	Encodes WRKY48, a member of the WRKY Transcription Factor. WRKY48 is a stress- and pathogen-induced transcriptional activator that represses plant basal defense. The mRNA is cell-to-cell mobile.	WRKY DNA-BINDING PROTEIN 48 (WRKY48) WRKY DNA-BINDING PROTEIN 48 (WRKY48);ARABIDOPSIS THALIANA WRKY DNA-BINDING PROTEIN 48 (ATWRKY48)	defence response, biotic stimulus	DOWN
AT5G50460	Subunit of SEC61 translocon.	(SEC61GAMMA) (SEC61GAMMA)	defence response, biotic stimulus	DOWN
AT5G52640	Encodes a cytosolic heat shock protein AtHSP90.1. AtHSP90.1 interacts with disease resistance signaling components SGT1b and RAR1 and is required for RPS2-mediated resistance. The mRNA is cell-to-cell mobile.	HEAT SHOCK PROTEIN 90.1 (HSP90.1) HEAT SHOCK PROTEIN 81-1 (HSP81-1); (ATHS83); (HSP81.1);HEAT SHOCK PROTEIN 90.1 (HSP90.1);HEAT SHOCK PROTEIN 90.1 (ATHSP90.1);HEAT SHOCK PROTEIN 90-1 (AtHsp90-1);HEAT SHOCK PROTEIN 83 (HSP83)	defence response, biotic stimulus	DOWN
AT5G52882	P-loop containing nucleoside triphosphate hydrolases superfamily protein;(source:Araport11)		biotic stimulus	DOWN
AT5G54640	Isolated from T-DNA insertion line, the rat5 mutant is deficient in T-DNA integration. Encodes histone2A protein.	RESISTANT TO AGROBACTERIUM TRANSFORMATION 5 (RAT5) HISTONE H2A 1 (HTA1); (ATHTA1);RESISTANT TO AGROBACTERIUM TRANSFORMATION 5 (RAT5)	biotic stimulus	UP
AT5G55050	GDSL-motif esterase/acyltransferase/lipase. Enzyme group with broad substrate specificity that may catalyze acyltransfer or hydrolase reactions with lipid and non-lipid substrates. The mRNA is cell-to-cell mobile.		defence response, biotic stimulus	DOWN
AT5G55460	Bifunctional inhibitor/lipid-transfer protein/seed storage 2S albumin superfamily protein;(source:Araport11)	(ATLTP4.5) (ATLTP4.5)	defence response, biotic stimulus	UP
AT5G57010	calmodulin-binding family protein;(source:Araport11)		defence response, biotic stimulus	DOWN
AT5G57220	member of CYP81F, involved in glucosinolate metabolism. Mutants had impaired resistance to fungi. The mRNA is cell-to-cell mobile.	CYTOCHROME P450, FAMILY 81, SUBFAMILY F, POLYPEPTIDE 2 (CYP81F2) CYTOCHROME P450, FAMILY 81, SUBFAMILY F, POLYPEPTIDE 2 (CYP81F2)	defence response, biotic stimulus	UP
AT5G57890	Encodes together with ASB1, At1g25220 and At5g57890 anthranilate synthase &#946; subunit which constitutes a heterotetramer complex with ASA.	(ASB2) (ASB2)	biotic stimulus	UP
AT5G59420	OSBP(oxysterol binding protein)-related protein 3C;(source:Araport11)	OSBP(OXYSTEROL BINDING PROTEIN)-RELATED PROTEIN 3C (ORP3C) OSBP(OXYSTEROL BINDING PROTEIN)-RELATED PROTEIN 3C (ORP3C)	defence response, biotic stimulus	UP
AT5G59680	Leucine-rich repeat protein kinase family protein;(source:Araport11)		defence response, biotic stimulus	UP
AT5G59890	actin depolymerizing factor 4 (ADF4) mRNA, complete cds	ACTIN DEPOLYMERIZING FACTOR 4 (ADF4) ACTIN DEPOLYMERIZING FACTOR 4 (ADF4); (ATADF4)	defence response, biotic stimulus	UP
AT5G61210	membrane localized t-SNARE SNAP25 homologue, probably involved in cytokinesis and cell plate formation The mRNA is cell-to-cell mobile.	SOLUBLE N-ETHYLMALEIMIDE-SENSITIVE FACTOR ADAPTOR PROTEIN 33 (SNAP33) SOLUBLE N-ETHYLMALEIMIDE-SENSITIVE FACTOR ADAPTOR PROTEIN 33 (SNAP33); (ATSNAP33B); (SNP33); (ATSNAP33)	biotic stimulus	UP
AT5G61530	small G protein family protein / RhoGAP family protein;(source:Araport11)		defence response	UP
AT5G62560	Plant U-box type E3 ubiquitin ligase (PUB).	PLANT U-BOX 41 (PUB41) PLANT U-BOX 41 (PUB41)	defence response, biotic stimulus	UP
AT5G64120	Encodes a cell wall bound peroxidase that is induced by hypo-osmolarity and is involved in the lignification of cell walls. Class III peroxidase cell wall-targeted protein localized to the micropylar endosperm facing the radicle. Involved in seed germination.	PEROXIDASE 71 (PRX71) (ATPRX71);PEROXIDASE 71 (PRX71)	defence response, biotic stimulus	DOWN
AT5G64840	ABCF5 is one of five members of the ABCF gene family in Arabidopsis, which are homologs of the yeast ABCF protein GCN20.	ATP-BINDING CASSETTE F5 (ABCF5) GENERAL CONTROL NONDEREPRESSIBLE 5 (GCN5);ATP-BINDING CASSETTE F5 (ABCF5);GENERAL CONTROL NON-REPRESSIBLE 5 (ATGCN5)	biotic stimulus	UP
AT5G65470	O-fucosyltransferase family protein;(source:Araport11)		defence response, biotic stimulus	DOWN
AT5G66675	transmembrane protein, putative (DUF677);(source:Araport11)		defence response, biotic stimulus	UP
AT5G66790	Protein kinase superfamily protein;(source:Araport11)		defence response, biotic stimulus	UP

## Sheet: Table S5
Table S5. Promoter motif enrichment analysis of genes mis-regulated in toc1-2 plants. Percentage of DEGs in toc1-2 versus rest of genes in genome containing motif of interest are indicated along with p-value for enrichment
	% of DEGs in toc1-2	% of genes in rest of genome	p-value for enrichment		TOC1 binding motifs in promoters of transcription factors differentially expressed in unchallenged toc1-2 versus C24 plants
UPREGULATED					Log2FC values for each TF at ZT18 and ZT22 are shown (where signfiicant) along with the motifs present in 1 kb region upstream of the TSS
G-box	18.4971	13.8678	0.019
ME	27.1676	23.1492	0.032		TF family	Gene ID	Gene name	Log2FC ZT18	Log2FC ZT22	Motifs present
HUD	43.9306	37.8945	0.016		Up-regulated TFs
DOWNREGULATED					AP2-ERF	AT3G50260	DEAR1	-	1.16	-
G-box	14.9254	13.8678	NS			AT3G15210	ERF4	-	0.91	G-box, HUD
ME	25.3731	23.1492	NS			AT1G06160	ORA59	3.02	-	G-box
HUD	41.0448	37.8945	NS			AT3G16770	ERF72	-	0.92	-
					C3H	AT5G10380	RING1	-	0.83	ME
						AT2G18670	ATL56	-	0.98	HUD
					EIL	AT2G27050	EIL1	-	0.84	-
						AT3G20770	EIN3	-	0.92	-
					MYB	AT1G18570	MYB51	-	0.86	ME, HUD
					NAC	AT5G08790	ANAC081/ATAF2	-	0.86	-
						AT5G22290	ANAC089	-	1.39	-
					TUB	AT2G18280	TLP2	-	0.59	HUD
						AT1G53320	TLP7	-	0.73	-
					Down-regulated TFs
					AP2-ERF	AT4G17490	ERF6	-	-1.82	HUD
					bHLH	AT4G17880	MYC4	-	-0.74	ME
						AT4G20970	bHLH162	-	-2.45	HUD
					MYB	AT1G57560	MYB50	-	-1.58	ME
					NAC	AT1G01010	ANAC001	-1.07	-	ME
						AT5G18270	ANAC087	-	-1.99	-
					WRKY	AT4G31800	WRKY18	-	-1.22	-
						AT5G49520	WRKY48	-	-2.08	ME
						AT2G25000	WRKY60	-	-0.81	-

## Sheet: Table S6
Table S6. TOC1-modulated B. cinerea responsive genes. Genes that are differentially expressed in response to B. cinerea in C24 but not toc1-2 plants at 18 and 22 hpi
Gene ID	Gene name	Log2 FC 18 hpi		Gene ID	Gene name	Log2 FC 22 hpi
AT1G02660	-	1.55897		AT1G01420	UGT72B3	-0.775796
AT1G03457	-	6.2007		AT1G01453	-	-4.75234
AT1G03530	NAF1	0.920163		AT1G01680	PUB54	1.24861
AT1G06160	ORA59	3.86366		AT1G01690	PRD3	-1.82657
AT1G07090	LSH6	0.751165		AT1G01770	-	-1.02364
AT1G07160	-	6.37369		AT1G01820	PEX11C	0.564541
AT1G08500	ENODL18	4.4302		AT1G02310	MAN1	-8.63387
AT1G09480	-	0.91782		AT1G02470	-	-1.00392
AT1G10990	-	2.65552		AT1G02475	-	-0.647759
AT1G12700	RPF1	2.15228		AT1G02500	SAM1	0.675287
AT1G13260	RAV1	0.853683		AT1G02950	GSTF4	-1.62684
AT1G14640	-	3.023		AT1G03495	-	-5.99407
AT1G14860	NUDT18	-2.91029		AT1G03780	TPX2	-2.81993
AT1G15125	-	4.72959		AT1G03820	-	-2.94408
AT1G15520	ABCG4-	4.39124		AT1G03840	MGP	-6.48412
AT1G17020	SRG1	-1.39775		AT1G03940	-	-3.8395
AT1G18810	-	-2.75386		AT1G04310	ERS2	1.61867
AT1G19000	-	-0.561307		AT1G04330	-	-2.57576
AT1G20590	-	6.30334		AT1G04990	-	-0.679158
AT1G21050	-	1.56016		AT1G05370	-	-2.03356
AT1G21326	-	2.60996		AT1G06380	-	1.00803
AT1G22500	ATL15	-1.50348		AT1G06400	ARA-2	-0.641497
AT1G24530	-	0.968357		AT1G06490	CalS7	-1.52316
AT1G25400	-	1.42789		AT1G06520	GPAT1	-3.22909
AT1G26560	BGLU4-	-1.52347		AT1G07040	-	-1.07735
AT1G26730	-	1.9166		AT1G07200	-	-1.00331
AT1G27020	-	2.37583		AT1G07280	-	-0.586545
AT1G28130	GH3.17	-3.71784		AT1G07930	-	0.640052
AT1G29690	CAD1	1.10822		AT1G07940	-	0.58718
AT1G29930	CAB1	1.27371		AT1G08230	-	-0.816705
AT1G30260	-	-1.12204		AT1G08830	CSD1	0.734717
AT1G33030	-	0.86174		AT1G09240	NAS3	-2.40582
AT1G33760	-	6.62312		AT1G09575	-	2.07069
AT1G34200	-	0.786314		AT1G09640	-	0.72923
AT1G34460	CYCB1;5	-6.50426		AT1G09850	XBCP3	-0.547331
AT1G47395	-	7.65002		AT1G10280	-	1.22217
AT1G47400	-	7.15989		AT1G10470	ARR4	0.925934
AT1G49010	-	-1.7376		AT1G10590	-	0.68105
AT1G49500	-	-1.65186		AT1G10650	-	-1.3924
AT1G49740	-	-0.920212		AT1G12630	-	3.1677
AT1G51460	ABCG13	6.53309		AT1G12800	-	-0.663647
AT1G51920	-	2.4677		AT1G13245	RTFL17	0.594017
AT1G52190	-	1.45529		AT1G13920	-	-4.036
AT1G52200	-	1.20977		AT1G14300	-	0.761484
AT1G52342	-	-1.60974		AT1G14580	-	1.15237
AT1G53430	-	1.21411		AT1G15270	-	-0.642504
AT1G54500	-	-0.624521		AT1G15380	GLYI4	-2.51371
AT1G54530	-	-5.99575		AT1G17020	SRG1	-1.46612
AT1G55230	-	4.14324		AT1G17040	SHA	-1.45787
AT1G56150	-	1.95144		AT1G17070	STIPL1	0.835528
AT1G59670	GSTU15	2.81824		AT1G17744	-	1.13719
AT1G60160	-	-0.848135		AT1G17860	-	-1.19137
AT1G61640	-	1.0936		AT1G18270	-	-0.773708
AT1G62320	-	2.49036		AT1G19200	-	-2.26521
AT1G62660	-	-0.927114		AT1G19240	-	0.686484
AT1G62770	-	6.79569		AT1G19490	-	-1.36036
AT1G63350	-	1.60045		AT1G19850	MP	-0.920568
AT1G64370	-	0.800245		AT1G20440	COR47	-2.08866
AT1G64500	-	-0.710674		AT1G21520	-	0.815946
AT1G65481	-	6.63734		AT1G22070	TGA3	0.895666
AT1G67850	-	0.850339		AT1G22270	-	0.669531
AT1G67870	-	0.693954		AT1G22930	-	-0.836729
AT1G68350	-	3.35588		AT1G23190	PGM3	-0.657777
AT1G68570	-	-0.987735		AT1G23840	-	0.804949
AT1G68620	-	1.0581		AT1G24764	MAP7--2	-0.929586
AT1G68670	-	-0.665822		AT1G25375	-	-0.828374
AT1G68840	RAV2	2.78478		AT1G25580	SOG1	0.990938
AT1G70580	AOAT2	-1.19227		AT1G27300	-	-1.05146
AT1G73330	DR4	1.15352		AT1G27320	HK3	-0.676054
AT1G73920	-	-1.12046		AT1G27700	-	-1.04518
AT1G74290	-	-1.00504		AT1G27770	ACA1	0.95264
AT1G74750	-	1.05651		AT1G28130	GH3.17	-3.33165
AT1G75380	BBD1	-0.686483		AT1G28400	-	-0.867344
AT1G76470	-	2.5403		AT1G28580	-	-0.63655
AT1G76520	-	0.870457		AT1G28650	-	-4.8861
AT1G76600	-	1.34635		AT1G28660	-	-0.860428
AT1G76680	OPR1	1.13032		AT1G29150	ATS9	0.51427
AT1G77090	-	-0.687757		AT1G29380	-	-1.80926
AT1G77760	NIA1	-1.89403		AT1G30540	-	0.770954
AT1G78600	LZF1	1.24018		AT1G30757	-	1.39225
AT1G80280	-	1.88534		AT1G31580	ECS1	0.9619
AT1G80560	IMD2	0.869039		AT1G32380	PRS2	0.628878
AT2G02320	PP2-B7	5.64632		AT1G32450	NRT1.5	-3.1229
AT2G02990	RNS1	-2.2135		AT1G33420	-	0.794037
AT2G03240	-	1.2339		AT1G33560	ADR1	0.614547
AT2G03710	SEP4	-1.28981		AT1G33612	-	6.18334
AT2G07798	-	2.14585		AT1G33800	GXMT1	1.40268
AT2G14610	PR1	-1.59477		AT1G33970	-	-0.71641
AT2G15620	NIR1	-0.642565		AT1G34180	NAC-16	0.816645
AT2G15760	-	1.83092		AT1G34200	-	0.820081
AT2G18196	-	5.95611		AT1G44800	SIAR1	-1.1536
AT2G19310	-	-0.683563		AT1G47980	-	-5.09268
AT2G20900	DGK5	0.724394		AT1G48170	-	0.642753
AT2G20950	-	0.676393		AT1G48320	DHNAT1	0.864058
AT2G23000	scpl1-	-2.92656		AT1G48610	-	1.15986
AT2G23320	WRKY15	1.13031		AT1G49040	SCD1	0.584113
AT2G23560	MES7	6.40213		AT1G49240	ACT8	0.589968
AT2G24500	FZF	0.788965		AT1G49670	NQR	-1.0099
AT2G25480	-	2.39365		AT1G49700	-	3.20774
AT2G26650	KT1	1.37416		AT1G51170	UCN	1.43176
AT2G28410	-	3.35172		AT1G51860	-	-3.37755
AT2G29320	-	-0.919478		AT1G52880	NAM	-1.11508
AT2G31230	ERF15	0.988495		AT1G53530	-	0.844571
AT2G32150	-	-0.896173		AT1G53620	-	2.76182
AT2G32530	CSLB-3	-1.42223		AT1G53680	GSTU28	-5.99819
AT2G34540	-	-4.02021		AT1G54100	ALDH7B4	-1.65709
AT2G34620	-	-1.95681		AT1G54340	ICDH	-1.0478
AT2G34650	PID	1.29412		AT1G54570	PES1	-2.97412
AT2G34655	-	1.23266		AT1G55490	CPN6-B	-0.900197
AT2G34960	CAT5	1.773		AT1G56010	NAC1	-0.989972
AT2G35470	-	-0.829336		AT1G56150	-	1.28611
AT2G36630	-	0.986642		AT1G58070	-	1.9407
AT2G37130	-	-0.817647		AT1G58180	BCA6	-1.09101
AT2G38110	GPAT6	-2.17654		AT1G58520	RXW8	-1.59093
AT2G38360	PRA1.B4	1.15351		AT1G59840	CCB4	-1.35563
AT2G39650	-	1.35862		AT1G60470	GolS4	4.7874
AT2G40710	-	-2.60526		AT1G60990	-	-0.696621
AT2G42060	-	5.95237		AT1G61050	-	-6.42575
AT2G42395	-	6.20023		AT1G61600	-	-2.48353
AT2G43000	NAC-42	1.30136		AT1G62370	-	-2.89469
AT2G43510	TI1	-1.34574		AT1G62620	-	-4.32405
AT2G44130	-	-1.2429		AT1G62660	-	-0.677216
AT2G44150	ASHH3	0.87216		AT1G62750	SCO1	-0.850336
AT2G46240	BAG6	1.55719		AT1G62810	CuAO1	-0.889388
AT2G46330	AGP16	1.54309		AT1G63830	-	1.05395
AT2G47000	ABCB4	1.19123		AT1G65790	RK1	0.737507
AT2G47650	UXS4	0.776184		AT1G66080	-	1.10902
AT3G01550	PPT2	-2.50956		AT1G66960	LUP5	1.05184
AT3G02040	SRG3	-0.922584		AT1G67325	-	0.629435
AT3G03190	GSTF11	-5.43313		AT1G67870	-	1.03578
AT3G04580	EIN4	0.843545		AT1G68320	MYB62	3.1667
AT3G04770	RPSAb	1.36374		AT1G68790	LINC3	-1.28474
AT3G06740	GATA15	1.62935		AT1G69580	-	-1.72416
AT3G07195	-	1.01561		AT1G70680	-	-7.91499
AT3G07310	-	-0.871406		AT1G70830	MLP28	1.93112
AT3G07390	AIR12	1.34881		AT1G72240	-	2.72146
AT3G08710	TH9	0.673995		AT1G72530	-	-2.42657
AT3G09000	-	0.664024		AT1G73220	OCT1	-7.59526
AT3G09350	Fes1A	1.09038		AT1G73250	GER1	0.946866
AT3G09940	MDHAR	1.2829		AT1G73500	MKK9	0.712512
AT3G10985	SAG2-	0.826789		AT1G73590	PIN1	-1.2934
AT3G11320	-	0.699277		AT1G73810	-	1.98674
AT3G13062	-	-0.851826		AT1G74710	EDS16	1.55389
AT3G15210	ERF4	0.906153		AT1G74940	-	-0.881663
AT3G15353	MT3	0.911351		AT1G75380	BBD1	-0.733365
AT3G16520	UGT88A1	-0.600657		AT1G75620	-	-3.19881
AT3G16560	-	-1.26436		AT1G76690	OPR2	-1.67453
AT3G16660	-	1.89811		AT1G77600	-	-1.46997
AT3G17390	MTO3	1.28535		AT1G77920	TGA7	-1.78829
AT3G17470	CRSH	-1.13034		AT1G77930	-	-0.672357
AT3G19130	RBP47B	0.817367		AT1G77990	AST56	-1.51441
AT3G19360	-	1.46442		AT1G78610	MSL6	-1.05008
AT3G19450	ATCAD4	-0.783048		AT1G78870	UBC35	0.520777
AT3G19970	-	1.06135		AT1G79460	GA2	-3.58248
AT3G21351	-	6.24838		AT1G79610	NHX6	-1.08475
AT3G21670	-	-1.24407		AT1G79700	WRI4	2.19089
AT3G21750	UGT71B1	-0.787855		AT1G80160	GLYI7	-4.95277
AT3G21890	BBX31	-3.10046		AT1G80440	-	1.9797
AT3G22142	-	5.42018		AT1G80570	-	-1.81134
AT3G22550	-	-1.04786		AT1G80790	FDM5	-0.78162
AT3G22910	-	-2.66928		AT1G80920	J8	-0.974435
AT3G22930	CML11	1.13315		AT2G01450	MPK17	0.602762
AT3G22970	-	-0.81284		AT2G01600	-	0.644995
AT3G23550	-	4.65476		AT2G02080	IDD4	-0.530887
AT3G24110	-	-4.38425		AT2G02710	PLPB	-1.73101
AT3G26170	CYP71B19	-0.92619		AT2G03140	-	-0.865668
AT3G27020	YSL6	-0.638667		AT2G03810	-	-2.32487
AT3G28860	ABCB19	1.11404		AT2G03980	-	-1.07317
AT3G28960	-	-4.23977		AT2G04450	NUDT6	1.30986
AT3G29240	-	-1.16668		AT2G04515	-	3.03345
AT3G44720	ADT4	0.83155		AT2G05220	-	0.609195
AT3G47210	-	2.6315		AT2G05540	-	-3.79048
AT3G47820	PUB39	0.842264		AT2G05642	-	-1.17892
AT3G47960	GTR1	-0.764166		AT2G06255	ELF4-L3	-1.12627
AT3G49530	NAC-62	0.669581		AT2G13800	SERK5	1.81652
AT3G50120	-	3.33593		AT2G13810	ALD1	3.60847
AT3G51420	SSL4	-0.620855		AT2G15042	-	1.25894
AT3G53480	ABCG37	-2.19258		AT2G15340	-	1.70786
AT3G54830	-	2.66602		AT2G15480	UGT73B5	1.08881
AT3G55970	JRG21	-1.30939		AT2G15695	-	-0.593721
AT3G56080	-	-0.984543		AT2G15960	-	1.21018
AT3G57330	ACA11	0.799576		AT2G17120	LYM2	0.637813
AT3G57450	-	0.977828		AT2G18110	-	0.65877
AT3G58490	SPP1	0.810014		AT2G18630	-	-0.971475
AT3G60260	-	1.13259		AT2G18950	HPT1	-0.993432
AT3G62690	ATL5	1.06682		AT2G20530	PHB6	0.70651
AT3G63215	-	-4.09158		AT2G20950	-	0.619094
AT4G00820	iqd17	2.07676		AT2G21350	-	1.15731
AT4G00970	CRK41	1.38109		AT2G21580	-	0.589569
AT4G04480	-	6.85137		AT2G21880	RAB7A	-3.58011
AT4G04745	-	3.58421		AT2G22610	-	-3.02998
AT4G04830	MSRB5	2.25156		AT2G23150	NRAMP3	-1.26168
AT4G08555	-	1.9486		AT2G23430	ICK1	-0.986663
AT4G09460	MYB6	-0.789521		AT2G23790	-	-1.84834
AT4G13885	-	3.34053		AT2G25440	RLP2-	2.08846
AT4G15236	ABCG43	1.67122		AT2G25450	-	-2.23275
AT4G15248	BBX3-	-3.21861		AT2G26270	-	-2.55938
AT4G15270	-	1.2982		AT2G26670	TED4	-0.680058
AT4G17245	-	0.787117		AT2G26975	COPT6	0.617027
AT4G17470	-	-1.02486		AT2G27150	AAO3	-0.847572
AT4G18670	-	2.03766		AT2G27200	-	0.756146
AT4G19430	-	4.34905		AT2G27610	-	-6.07909
AT4G19460	-	-2.01558		AT2G27990	BLH8	-1.76656
AT4G19850	PP2-A2	5.73264		AT2G28110	FRA8	-2.91789
AT4G22570	APT3	-1.64541		AT2G28200	-	-1.38568
AT4G23320	CRK24	1.05235		AT2G28510	-	-1.32696
AT4G25730	-	0.755742		AT2G28840	XBAT31	0.61073
AT4G27260	WES1	1.11209		AT2G29090	CYP7-7A2	-1.42128
AT4G27300	-	1.7302		AT2G30050	-	0.716086
AT4G27310	BBX28	-2.07679		AT2G30140	UGT87A2	0.701613
AT4G27640	-	0.70845		AT2G30440	TPP	0.544294
AT4G27900	-	0.93716		AT2G30695	-	-1.02962
AT4G28730	GrxC5	-0.985606		AT2G30760	-	4.48542
AT4G30230	-	2.5836		AT2G30860	GSTF9	0.95156
AT4G30680	-	2.23134		AT2G30980	SKdZeta	0.521966
AT4G31330	-	1.67386		AT2G31110	-	-1.11521
AT4G32460	-	0.957789		AT2G31610	-	0.620559
AT4G33666	-	-2.18819		AT2G31865	PARG2	0.888818
AT4G33925	SSN2	1.95912		AT2G32150	-	-0.82989
AT4G36230	-	3.80969		AT2G32860	BGLU33	-1.4952
AT4G36380	ROT3	-2.4151		AT2G33080	RLP28	-1.67948
AT4G38810	-	-0.655949		AT2G33410	-	0.498988
AT4G38940	-	0.793021		AT2G33480	NAC-41	-0.808656
AT5G01710	-	0.614275		AT2G33830	-	1.34952
AT5G01810	CIPK15	0.622536		AT2G33847	-	2.36736
AT5G02780	GSTL1	1.86706		AT2G34260	WDR55	1.03455
AT5G04740	ACR12	-0.831323		AT2G34310	-	-0.938464
AT5G04890	RTM2	-2.81568		AT2G34540	-	-3.24738
AT5G06260	-	-0.692217		AT2G34610	-	-5.55714
AT5G10430	AGP4	6.53219		AT2G34650	PID	1.52383
AT5G10520	RBK1	1.24884		AT2G34810	-	-1.72952
AT5G10946	-	-6.06101		AT2G35030	-	-2.0105
AT5G11140	-	5.92785		AT2G35965	-	3.66923
AT5G12950	-	-1.06075		AT2G36170	-	0.593929
AT5G13100	-	1.35092		AT2G36200	-	-1.88817
AT5G15860	PCME	-1.09641		AT2G36220	-	1.21029
AT5G16480	PFA-DSP5	1.50859		AT2G36950	-	-1.37219
AT5G17390	-	7.0071		AT2G37110	-	0.677491
AT5G18670	BMY3	-0.844904		AT2G37760	AKR4C8	-0.582867
AT5G19260	FAF3	2.48957		AT2G37890	-	1.33799
AT5G19300	-	1.36385		AT2G38110	GPAT6	-2.69985
AT5G19890	-	-7.08028		AT2G38660	-	-0.721149
AT5G22300	NIT4	2.89525		AT2G38790	-	0.940728
AT5G22555	-	4.13781		AT2G39850	-	1.28857
AT5G23510	-	0.825691		AT2G40980	-	0.722051
AT5G23860	TUB8	1.29526		AT2G41130	-	-1.22755
AT5G24150	SQP1	-2.35581		AT2G41160	-	0.791067
AT5G24155	-	-2.32963		AT2G41180	SIB2	0.977803
AT5G24860	FPF1	-2.48969		AT2G41220	GLU2	-1.2167
AT5G25120	CYP71B11	-0.94534		AT2G41300	SSL1	-2.22989
AT5G25370	PLDALPHA3	-6.54412		AT2G41410	-	1.10974
AT5G25900	GA3	0.781652		AT2G41420	WIH2	0.524473
AT5G28630	-	6.68416		AT2G42350	-	1.22921
AT5G37260	RVE2	-0.978999		AT2G43350	GPX3	-0.680069
AT5G37490	-	6.68152		AT2G43510	TI1	-1.57829
AT5G40590	-	7.69738		AT2G43580	-	2.20426
AT5G40990	GLIP1	8.69789		AT2G44290	-	1.3322
AT5G41100	-	1.01982		AT2G44900	ARABIDILLO-1	0.597259
AT5G41170	-	5.9434		AT2G44990	CCD7	-7.53827
AT5G41761	-	2.58855		AT2G45760	BAP2	3.05801
AT5G44380	-	-1.86802		AT2G46600	-	0.948783
AT5G44570	-	-1.20638		AT2G46700	CRK3	-1.02496
AT5G46100	-	4.4746		AT2G46950	CYP7-9B2	-8.19296
AT5G46295	-	6.91309		AT2G48010	RKF3	0.912828
AT5G47550	-	-1.00108		AT3G01820	-	0.655816
AT5G50200	WR3	1.02848		AT3G01950	-	-2.40827
AT5G50335	-	2.46764		AT3G02560	-	0.6569
AT5G52250	RUP1	1.21102		AT3G03020	-	0.730738
AT5G54720	-	1.23054		AT3G03480	CHAT	-3.5431
AT5G57060	-	0.750604		AT3G03640	BGLU25	-0.95449
AT5G57760	-	2.66622		AT3G03650	EDA5	-5.81724
AT5G59000	-	1.09897		AT3G03890	-	-0.678325
AT5G59350	-	-1.27539		AT3G04050	-	6.52396
AT5G60490	FLA12	7.16797		AT3G04070	NAC-47	-1.58221
AT5G62440	-	0.809952		AT3G04520	THA2	-1.03577
AT5G62865	-	0.976138		AT3G04670	WRKY39	0.601612
AT5G63010	-	0.920755		AT3G04680	CLPS3	0.714598
AT5G64570	XYL4	-1.12032		AT3G05165	-	-1.11126
AT5G64905	PROPEP3	4.57884		AT3G05400	-	-5.34743
AT5G65207	-	-1.14534		AT3G05550	-	4.55472
AT5G65310	HB5	0.908219		AT3G06810	IBR3	-0.720862
AT5G65390	AGP7	3.00674		AT3G07430	YLMG1-1	0.54898
AT5G65920	-	1.01951		AT3G07720	-	0.677019
AT5G66052	-	-1.27889		AT3G07930	-	-1.31573
ATCG00120	ATPA	0.802638		AT3G08660	-	-4.15232
ATCG00130	ATPF	0.783316		AT3G08947	-	0.689096
ATCG00160	RPS2	1.08631		AT3G08990	-	-0.959342
ATCG00180	RPOC1	0.973099		AT3G09000	-	1.20512
ATCG00380	RPS4	0.972828		AT3G09190	-	-1.03072
ATCG00420	NDHJ	0.807027		AT3G09980	-	-0.829569
ATCG00430	PSBG	1.04356		AT3G10405	-	-1.11841
ATCG00440	NDHC	0.927271		AT3G10550	MTM1	-1.27636
ATCG00770	RPS8	0.86827		AT3G10570	CYP77A6	-4.56391
ATCG00780	RPL14	1.22575		AT3G10630	-	-1.02936
ATCG01110	NDHH	0.927677		AT3G10970	-	-0.571982
				AT3G11090	LBD21	0.620947
				AT3G11770	-	0.798127
				AT3G13910	-	0.881342
				AT3G13920	EIF4A1	0.691782
				AT3G14720	MPK19	-0.776293
				AT3G15030	TCP4	0.767831
				AT3G16170	AAE13	-0.795498
				AT3G16800	-	1.04798
				AT3G17180	scpl33	-2.26959
				AT3G17360	POK1	-4.96736
				AT3G17810	PYD1	-0.971857
				AT3G17820	GLN1.3	-0.831765
				AT3G18670	-	-3.74043
				AT3G19150	KRP6	-1.18372
				AT3G19270	CYP7-7A4	-7.06477
				AT3G19370	-	-1.73957
				AT3G20490	-	1.41215
				AT3G20560	PDIL5-3	-0.808946
				AT3G20600	NDR1	1.38367
				AT3G20670	HTA13	1.00266
				AT3G20800	-	0.510219
				AT3G21070	NADK1	1.03978
				AT3G21150	BBX32	1.07937
				AT3G21250	ABCC8	-0.900632
				AT3G21420	LBO1	-1.35153
				AT3G22790	NET1A	-2.09198
				AT3G22950	ARFC1	0.58999
				AT3G22980	-	0.693066
				AT3G23090	-	-1.60146
				AT3G23120	RLP38	3.64834
				AT3G23150	ETR2	1.61335
				AT3G23410	FAO3	-1.19201
				AT3G23635	RTFL13	-6.14843
				AT3G23790	AAE16	-1.83857
				AT3G23890	TOPII	-1.91307
				AT3G24140	FMA	-1.1539
				AT3G24460	-	-1.86661
				AT3G24900	RLP39	0.744672
				AT3G25710	BHLH32	-2.23232
				AT3G25870	-	-1.17983
				AT3G26170	CYP71B19	-0.810596
				AT3G26280	CYP71B4	-1.20701
				AT3G26300	CYP71B34	-0.772355
				AT3G26580	-	-0.620836
				AT3G26890	-	-0.825944
				AT3G27110	-	-0.775633
				AT3G28080	UMAMIT47	-1.32649
				AT3G28100	UMAMIT45	-1.43314
				AT3G28150	TBL22	-6.36388
				AT3G28860	ABCB19	1.01908
				AT3G29090	PME31	-0.804473
				AT3G44010	-	0.643646
				AT3G44300	NIT2	-2.55944
				AT3G44350	NAC-61	1.47438
				AT3G44880	ACD1	-1.36619
				AT3G45010	scpl48	-2.4329
				AT3G45650	NAXT1	1.37404
				AT3G45970	EXLA1	-1.6812
				AT3G47960	GTR1	-0.636557
				AT3G48000	ALDH2B4	-0.563072
				AT3G48580	XTH11	-8.63195
				AT3G48630	-	1.76387
				AT3G49120	PRXCB	-1.28106
				AT3G49370	-	2.41571
				AT3G51890	-	0.739759
				AT3G51960	BZIP24	-1.96083
				AT3G51970	ASAT1	-1.51356
				AT3G52430	PAD4	1.02969
				AT3G52780	PAP2-	-8.82296
				AT3G52840	BGAL2	-0.870734
				AT3G52850	VSR1	-0.694519
				AT3G53270	-	-0.878848
				AT3G53480	ABCG37	-2.86113
				AT3G53580	-	0.589892
				AT3G55730	MYB1-9	1.11128
				AT3G56500	-	3.56777
				AT3G56630	CYP94D2	-0.597321
				AT3G56800	CAM3	0.814475
				AT3G56950	SIP2;1	-0.654317
				AT3G57090	BIGYIN	0.536984
				AT3G57660	NRPA1	1.00072
				AT3G57700	-	0.758838
				AT3G59140	ABCC1-	-1.07161
				AT3G59210	-	-0.67539
				AT3G59750	-	2.59534
				AT3G60190	DL1E	0.635148
				AT3G60415	-	1.67494
				AT3G60420	-	3.76134
				AT3G60530	GATA4	1.19001
				AT3G60920	-	-1.17431
				AT3G62590	-	-1.54348
				AT3G62780	-	1.26694
				AT4G00270	-	-0.746612
				AT4G01430	UMAMIT29	-2.10281
				AT4G01800	AGY1	-0.684069
				AT4G01995	-	-0.811119
				AT4G02120	-	-0.726453
				AT4G02150	MOS6	-0.994059
				AT4G02280	SUS3	-2.70432
				AT4G02360	-	1.86106
				AT4G02380	SAG21	1.26058
				AT4G02410	-	0.765172
				AT4G02640	BZO2H1	-0.594122
				AT4G03000	-	-0.644221
				AT4G03120	-	0.683119
				AT4G04460	-	-4.76231
				AT4G04830	MSRB5	-1.7205
				AT4G05070	-	0.75543
				AT4G05100	MYB74	-2.73338
				AT4G05410	YAO	0.927659
				AT4G05430	-	-3.82459
				AT4G05530	IBR1	-0.644828
				AT4G07965	-	0.917306
				AT4G08540	-	-0.863509
				AT4G09520	-	-0.916483
				AT4G09570	CPK4	0.822976
				AT4G10970	-	0.570049
				AT4G11240	TOPP7	0.564564
				AT4G11300	-	0.715195
				AT4G11420	EIF3A	0.549033
				AT4G11910	-	-1.68107
				AT4G11960	PGRL1B	-0.915627
				AT4G12040	SAP7	0.627753
				AT4G12290	-	-0.763935
				AT4G12735	-	1.95459
				AT4G12910	scpl2-	-0.907356
				AT4G13020	MHK	-0.549921
				AT4G13530	-	-0.816034
				AT4G13615	-	0.599425
				AT4G13670	PTAC5	-0.648435
				AT4G14090	-	-2.50104
				AT4G14290	-	-2.83598
				AT4G14770	TCX2	-2.31242
				AT4G15110	CYP97B3	-0.716068
				AT4G15850	RH1	1.12421
				AT4G16146	-	1.79544
				AT4G16240	-	-1.97826
				AT4G16730	TPS-2	-5.34096
				AT4G17020	-	-1.0226
				AT4G17230	SCL13	0.968561
				AT4G17905	ATL4H	-1.61055
				AT4G18195	PUP8	3.01811
				AT4G18540	-	7.43729
				AT4G18670	-	1.48232
				AT4G18870	-	6.41569
				AT4G18880	HSF A4A	0.804688
				AT4G18905	-	0.684375
				AT4G19050	-	-2.68267
				AT4G19925	-	5.95905
				AT4G20040	-	-6.06973
				AT4G20260	PCAP1	-0.704502
				AT4G20440	smB	0.650836
				AT4G21650	-	1.46006
				AT4G22130	SRF8	-0.790002
				AT4G22470	-	-1.82359
				AT4G22670	HIP1	0.536351
				AT4G22730	-	-1.47462
				AT4G22980	-	1.42394
				AT4G23160	CRK8	1.04001
				AT4G23600	CORI3	-1.82879
				AT4G25000	AMY1	-3.26217
				AT4G25740	-	0.623838
				AT4G26060	-	0.666154
				AT4G26070	MEK1	0.620493
				AT4G26590	OPT5	-6.54825
				AT4G26760	MAP65-2	-1.48996
				AT4G27260	WES1	1.37579
				AT4G27310	BBX28	1.00888
				AT4G27657	-	0.922685
				AT4G28220	NDB1	1.08527
				AT4G28390	AAC3	0.61347
				AT4G28500	NAC-73	-3.86184
				AT4G28650	-	-2.59267
				AT4G29010	AIM1	-0.900197
				AT4G29410	-	0.653
				AT4G29680	-	-0.760229
				AT4G29920	-	-1.61134
				AT4G30450	-	0.984239
				AT4G30890	UBP24	0.613836
				AT4G31860	-	0.594366
				AT4G32020	-	0.715529
				AT4G32200	ASY2	0.867286
				AT4G32250	-	-2.0777
				AT4G32870	-	0.824309
				AT4G32940	GAMMA-VPE	-1.00712
				AT4G33090	APM1	-0.800149
				AT4G33110	-	-0.91514
				AT4G33150	-	-2.92786
				AT4G33500	-	-0.694736
				AT4G33520	PAA1	0.717292
				AT4G33925	SSN2	2.70618
				AT4G34020	DJ1C	-0.703654
				AT4G34280	-	-0.869253
				AT4G34412	-	0.635097
				AT4G34460	AGB1	0.629842
				AT4G35440	CLC-E	-1.3355
				AT4G35783	RTFL6	-2.78913
				AT4G37110	-	-3.25378
				AT4G37330	CYP81D4	-0.854326
				AT4G37400	CYP81F3	3.32352
				AT4G37430	CYP91A2	-2.78104
				AT4G37990	ELI3-2	-1.99936
				AT4G38630	RPN1-	0.5047
				AT4G39955	-	-0.968229
				AT5G01980	-	0.56657
				AT5G02500	HSC7--1	0.652493
				AT5G02810	PRR7	-5.37988
				AT5G02940	-	-0.675085
				AT5G03170	FLA11	2.18122
				AT5G04480	-	-0.984226
				AT5G04720	ADR1-L2	1.03153
				AT5G04740	ACR12	-0.807734
				AT5G04830	-	-0.596571
				AT5G05410	DREB2A	4.37275
				AT5G06130	-	-0.595181
				AT5G06220	-	-0.928408
				AT5G06230	TBL9	-1.77545
				AT5G06300	LOG7	1.12342
				AT5G06530	ABCG22	-0.741334
				AT5G06570	-	3.28564
				AT5G07810	-	-6.5446
				AT5G08620	STRS2	0.818176
				AT5G08640	FLS1	-3.4485
				AT5G09510	-	0.974947
				AT5G09570	-	1.69733
				AT5G10170	MIPS3	1.66941
				AT5G10280	MYB92	3.8779
				AT5G11060	KNAT4	-0.931544
				AT5G11230	-	-0.893202
				AT5G12050	-	1.49437
				AT5G12200	PYD2	-0.662639
				AT5G13070	-	0.616939
				AT5G13320	PBS3	1.869
				AT5G13370	-	0.721041
				AT5G13680	ABO1	1.08202
				AT5G13800	PPH	-1.14434
				AT5G13860	ELC-Like	0.778596
				AT5G14590	-	-0.654534
				AT5G14970	-	-0.615713
				AT5G18270	ANAC-87	-3.22195
				AT5G18340	-	-1.30734
				AT5G18630	-	-0.7358
				AT5G18970	-	-2.2344
				AT5G19090	-	-1.19623
				AT5G19750	-	0.753399
				AT5G20660	-	-0.620129
				AT5G20970	-	-2.2309
				AT5G21105	-	-0.831637
				AT5G22020	-	-0.908138
				AT5G22140	-	-1.95404
				AT5G22340	-	-0.738058
				AT5G22550	-	-5.24094
				AT5G22630	ADT5	1.01319
				AT5G23680	-	-1.2496
				AT5G23900	-	0.77501
				AT5G24030	SLAH3	-1.07299
				AT5G24318	-	-2.03889
				AT5G24860	FPF1	-2.18529
				AT5G25140	CYP71B13	-1.43732
				AT5G25190	ESE3	1.33237
				AT5G25370	PLDALPHA3	-6.15381
				AT5G26690	-	1.11178
				AT5G26760	-	-0.738104
				AT5G26780	SHM2	-0.856993
				AT5G26920	CBP6-G	1.63243
				AT5G27350	SFP1	-0.903992
				AT5G28400	-	-1.99661
				AT5G34850	PAP26	-0.768575
				AT5G34940	GUS3	-1.45519
				AT5G35560	-	-0.688123
				AT5G37480	-	0.686776
				AT5G37540	-	-0.882612
				AT5G38990	-	0.510003
				AT5G39520	-	-3.86124
				AT5G39730	-	-0.867122
				AT5G40240	UMAMIT4-	-1.232
				AT5G40880	-	0.880951
				AT5G41210	GSTT1	-0.650997
				AT5G41470	-	-3.93317
				AT5G41790	CIP1	-0.666959
				AT5G42510	-	-9.7176
				AT5G42530	-	0.755092
				AT5G43190	-	1.08405
				AT5G43450	-	0.825277
				AT5G43745	-	-1.67425
				AT5G44260	-	1.57997
				AT5G44570	-	0.829516
				AT5G45275	-	-0.955865
				AT5G45800	MEE62	-0.755386
				AT5G46180	DELTA-OAT	-1.38117
				AT5G46420	-	-0.744283
				AT5G46590	NAC-96	-1.76029
				AT5G46950	-	-8.5765
				AT5G47760	PGLP2	-0.722618
				AT5G47860	-	-0.769746
				AT5G48150	PAT1	0.676709
				AT5G48300	ADG1	-0.607901
				AT5G48310	-	-3.18078
				AT5G50335	-	1.81517
				AT5G50810	TIM8	0.818548
				AT5G50920	CLPC1	-0.709978
				AT5G51040	SDHAF2	-0.687291
				AT5G51340	-	0.668406
				AT5G51740	-	0.85068
				AT5G52070	-	-0.878878
				AT5G52740	-	2.48609
				AT5G53350	CLPX	-1.32374
				AT5G53450	ORG1	-0.977323
				AT5G53560	CB5-E	0.603839
				AT5G54080	HGO	-0.827685
				AT5G54130	-	-1.14902
				AT5G54610	ANK	0.766829
				AT5G54700	-	1.78459
				AT5G54850	-	1.84528
				AT5G55090	MAPKKK15	-2.92173
				AT5G55570	-	-1.07167
				AT5G55830	-	-2.90281
				AT5G56230	PRA1.G2	1.4278
				AT5G56720	c-NAD-MDH3	-3.01236
				AT5G56795	MT1B	-2.67781
				AT5G57130	-	-0.742935
				AT5G57370	-	0.771949
				AT5G57760	-	2.69613
				AT5G58375	-	0.579235
				AT5G58420	-	0.66718
				AT5G59000	-	1.1439
				AT5G59350	-	-1.32983
				AT5G60630	-	1.92264
				AT5G61580	PFK4	-0.720439
				AT5G61760	IPK2BETA	0.557737
				AT5G62020	HSFB2A	1.01856
				AT5G62530	ALDH12A1	-0.553375
				AT5G62910	-	0.684736
				AT5G62960	-	-1.65248
				AT5G63450	CYP94B1	3.25827
				AT5G63600	FLS5	-2.96537
				AT5G63800	MUM2	-1.17026
				AT5G64140	RPS28	0.75346
				AT5G64170	-	-2.08486
				AT5G64190	-	-2.2362
				AT5G64570	XYL4	-1.19329
				AT5G64810	WRKY51	1.05139
				AT5G65020	ANNAT2	-0.820458
				AT5G65110	ACX2	-0.815278
				AT5G65470	-	-1.01414
				AT5G65610	-	2.95599
				AT5G65710	HSL2	-0.977933
				AT5G66010	-	0.80821
				AT5G66675	-	0.713479
				AT5G66760	SDH1-1	-0.821122
				AT5G66890	-	7.39855
				AT5G67600	WIH1	0.724197
				ATCG00070	PSBK	0.860102
				ATCG00080	PSBI	0.898097
				ATCG00170	RPOC2	-0.932008
				ATCG00180	RPOC1	-0.77539
				ATCG00190	RPOB	-0.944991
				ATCG00220	PSBM	1.31119

## Sheet: Table S7
Table S7. Promoter motif enrichment analysis of TOC1-modulated B. cinerea responsive genes. Percentage of TOC1-modulated genes versus rest of genes in genome containing motif of interest are indicated along with p-value for enrichment
	% of TOC1-modulated genes	% of genes in rest of genome	p-value for enrichment
UPREGULATED
G-box	16.4147	13.8678	0.015
ME	24.1901	23.1492	0.038
HUD	37.581	37.8945	NS
DOWNREGULATED
G-box	19.0789	13.8678	0.001
ME	23.0263	23.1492	NS
HUD	41.0088	37.8945	0.015

## Sheet: Table S8
Table S8. No antibody control % input values for ChIP experiments on TMG and TMG myc2 plants
No antibody controls were performed on uninfected TMG samples. Percentage input values for uninfected samples immuno-precipitated with anti-GFP are shown for comparison
ERF4	G-box		exon
Experiment	with ab	no ab	with ab	no ab
1	1.06161	0.0402811	0.0751673	0.0313856
2	0.593059	0.0207068	0.0668119	0.0595738
3	1.00753
Mean	0.887398	0.030494	0.0709896	0.0454797
ORA47	G-box		exon
Experiment	with ab	no ab	with ab	no ab
1	1.2	0.0171726	0.0358036	0.0623377
2	0.622544	0.00153904	0.042874	0.0195163
3	0.466782
Mean	0.763109	0.0093558	0.0393388	0.040927
ORA59	G-box		exon
Experiment	with ab	no ab	with ab	no ab
1	0.385887	0.0187918	0.113145	0.00637327
2	0.335934	0.0320451	0.0546456	0.0236216
3	0.326748		0.0180263
Mean	0.349523	0.0254185	0.0619391	0.0149974
WRKY33	G-box		exon
Experiment	with ab	no ab	with ab	no ab
1	1.15368	0.0751673	0.206791	0.0267605
2	0.963428	0.018278	0.149296	0.0475717
3	0.590833		0.0602142
Mean	0.902648	0.0467226	0.138767	0.0371661

## Sheet: Table S9
Table S9. Summary statistics for two-way ANOVA performed on ChIP qPCR and RT-PCR experimental data from TMG and TMG myc2 plants
Experiment	Gene	Factor	F (DFn, DFd)	p-value	partial eta squared
ChIP qPCR (Fig. 4A)	ERF4	Genetic locus	F (3, 12) = 41,94	<0,0001	55.19
		Pathogen challenge	F (1, 12) = 8,961	0.0112	3.931
		Interaction	F (3, 12) = 26,51	<0,0001	34.88
	ORA47	Genetic locus	F (3, 12) = 15,78	0.0002	52.93
		Pathogen challenge	F (1, 12) = 5,866	0.0322	6.558
		Interaction	F (3, 12) = 7,423	0.0045	24.9
	ORA59	Genetic locus	F (3, 16) = 19,61	<0,0001	56.08
		Pathogen challenge	F (1, 16) = 3,004	0.1023	2.864
		Interaction	F (3, 16) = 9,019	0.001	25.8
	WRKY33	Genetic locus	F (3, 16) = 17,69	<0,0001	41.88
		Pathogen challenge	F (1, 16) = 11,16	0.0041	8.806
		Interaction	F (3, 16) = 15,50	<0,0001	36.69
RT-qPCR (Fig. 4B)	ERF4	Plant genotype	F (1, 8) = 7,527	0.0253	2.732
		Pathogen challenge	F (1, 8) = 255,4	<0,0001	92.69
		Interaction	F (1, 8) = 4,616	0.0639	1.675
	ORA47	Plant genotype	F (1, 8) = 13,32	0.0065	14.13
		Pathogen challenge	F (1, 8) = 65,77	<0,0001	69.78
		Interaction	F (1, 8) = 7,162	0.0281	7.6
	ORA59	Plant genotype	F (1, 8) = 6,579	0.0334	4.225
		Pathogen challenge	F (1, 8) = 138,5	<0,0001	88.91
		Interaction	F (1, 8) = 2,691	0.1395	1.728
	WRKY33	Plant genotype	F (1, 8) = 11,48	0.0095	3.761
		Pathogen challenge	F (1, 8) = 285,7	<0,0001	93.6
		Interaction	F (1, 8) = 0,07016	0.7978	0.02299

## Sheet: Table S10
Table S10. No antibody control % input values for ChIP experiments on YPet and YPet toc1 plants
No antibody controls were performed on uninfected YPet samples. Percentage input values for uninfected samples immuno-precipitated with anti-GFP are shown for comparison
ERF4	G-box		exon
Experiment	with ab	no ab	with ab	no ab
1	0.601338	0.183805	0.0919025	0.0550257
2	0.360045	0.0241179	0.0912677	0.0779609
3	0.676541
4	0.452581
Mean	0.522626	0.103961	0.0915851	0.0664933
ORA47	G-box		exon
Experiment	with ab	no ab	with ab	no ab
1	0.32902	0.138336	0.113932	0.0198633
2	0.265402	0.0411275	0.0623377	0.0122497
3	0.468541
4	0.252832
Mean	0.328949	0.0897318	0.088135	0.0160565
ORA59	G-box		exon
Experiment	with ab	no ab	with ab	no ab
1	0.681246	0.0565727	0.110817	0.199747
2	0.360045	0.131114	0.194285	0.120428
3	0.913131		0.113145
4	0.999233		0.144211
Mean	0.738414	0.0938433	0.140614	0.160088
WRKY33	G-box		exon
Experiment	with ab	no ab	with ab	no ab
1	0.33827	0.120428	0.175421	0.0258964
2	0.252832	0.0400029	0.189319	0.0135161
3	0.391273		0.0504438
4	0.202536		0.0587536
Mean	0.296228	0.0802157	0.118484	0.0197062

[truncated: 1 more sheets: Table S11]
