# Supplementary material for: The core clock transcription factor TOC1 is a direct regulator of immunity in Arabidopsis
Source: Research Square preprint supplement (doi:10.21203/rs.3.rs-7000350/v1), 2025-07-16
Supplement: Supplementary file 2 [file c73b8d3b05d45d468aa2f76a.pdf]

## Complete chromatin immunoprecipitation (ChIP) protocol

Two-week old seedlings grown on MS plates were spray inoculated with *B. cinerea* spores ( $5 \times 10^5$  spores  $\text{mL}^{-1}$ ) or half-strength grape juice at ZT0 and harvested at ZT18. Two g of tissue were cross-linked in fixation buffer (0.4 M sucrose, 10 mM Tris-HCl pH 8.0, 1 mM EDTA, 1 mM PMSF and 1 % (v/v) formaldehyde) at RT under vacuum for 30 min. The cross-linking reaction was quenched with 2 M glycine, added to a final concentration of 0.125 M and vacuum infiltrated for 10 min. The seedlings were ground to a fine powder in liquid nitrogen and cross-linked chromatin complexes were isolated in 25 mL of cold nuclei isolation buffer (0.25 M sucrose, 15 mM piperazine-N,N'-bis 2-ethanesulfonic acid (PIPES) pH 6.8, 5 mM  $\text{MgCl}_2$ , 60 mM KCl, 15 mM NaCl, 1 mM  $\text{CaCl}_2$ , 0.9 % (v/v) Triton X-100, 1 mM PMSF and 1x Halt Protease Inhibitor Cocktail). The solution was filtered through two layers of miracloth, incubated on ice for 30 min and then centrifuged at  $11\,000 \times g$  for 15 min at  $4^\circ\text{C}$ . The pellets were resuspended in 600  $\mu\text{L}$  of cold nuclei lysis buffer (50 mM HEPES pH 7.5, 150 mM NaCl, 1 mM EDTA, 1 % (w/v) SDS, 0.1 % (w/v) sodium deoxycholate, 1 % (v/v) Triton X-100, 1 mM PMSF and 1x Halt Protease Inhibitor Cocktail) and sonicated for 18 min on a cycle of 20 s at maximum power followed by a 40 s rest using a QSonica Q700 sonicator. The sonicated chromatin was then clarified by centrifugation at  $4^\circ\text{C}$  for 10 min at  $13\,800 \times g$ .

Pre-blocking was performed by incubating 500  $\mu\text{L}$  of protein A/G PLUS beads (Santa Cruz Biotechnology, USA), with 100  $\mu\text{g}$  salmon sperm DNA (Sigma-Aldrich), 1 mg  $\text{mL}^{-1}$  BSA in 2 mL ChIP dilution buffer (16.7 mM Tris-HCl pH 8, 167 mM NaCl, 1.2 mM EDTA, 1.1% (v/v) Triton X-100, 1 mM PMSF and 1x Halt Protease Inhibitor Cocktail) for 1 h at  $4^\circ\text{C}$  with rotation.

Thereafter the beads were collected by centrifugation and resuspended in 500  $\mu\text{L}$  of ChIP dilution buffer. For input samples, 30  $\mu\text{g}$  of chromatin was made up to 100  $\mu\text{L}$  with Nuclear lysis buffer (50 mM HEPES pH 7.5, 150 mM NaCl, 1 mM EDTA, 1 % (w/v) SDS, 0.1 % (w/v) sodium deoxycholate, 1 % (v/v) Triton X-100, 1 mM PMSF and 1x Halt Protease Inhibitor Cocktail) and diluted with 400  $\mu\text{L}$  of Elution buffer (0.5 % (w/v) SDS, 0.1 M  $\text{NaHCO}_3$ ). For immunoprecipitation, 80  $\mu\text{g}$  of chromatin was made up to a final volume of 100  $\mu\text{L}$  with nuclear lysis buffer and diluted with 900  $\mu\text{L}$  of ChIP dilution buffer. The diluted chromatin was then pre-cleared by adding 30  $\mu\text{L}$  pre-blocked protein A/G PLUS beads, followed by rotation for 1 h at  $4^\circ\text{C}$  to reduce non-specific binding. The pre-cleared chromatin solutions

were collected by centrifugation at 15 000 x g for 10 min and immunoprecipitated with 5 µg anti-GFP N-terminal antibody (Sigma-Aldrich) overnight at 4°C with rotation. Negative control immunoprecipitations were performed using samples treated in the same manner but without the addition of an antibody, or with chromatin from Col-0 plants immunoprecipitated with anti-GFP N-terminal antibody.

Following overnight immunoprecipitation, an additional 40 µL of pre-blocked protein A/G PLUS beads was added to each sample, and incubated for a further 2 h at 4°C.

Immunoprecipitated samples were sequentially washed for 8 min with gentle rotation at 4°C with 1 mL of the following buffers: once with low salt wash buffer (150 mM NaCl, 0.2 % (w/v) SDS, 0.5% (w/v) Triton X-100, 2 mM EDTA, 20 mM Tris-HCl pH8, 1 mM PMSF and 1x Halt Protease Inhibitor Cocktail ) once with high salt wash buffer (as above but with 500 mM NaCl), once with LiCl wash buffer (0.25 M LiCl, 1 % (v/v) NP-40, 1 % (w/v) sodium deoxycholate, 1 mM EDTA, 10 mM Tris-HCl pH8, 1 mM PMSF and 1x Halt Protease Inhibitor Cocktail ) and then three times with TE wash buffer (10 mM Tris-HCl pH8, 1 mM EDTA, 1 mM PMSF and 1x Halt Protease Inhibitor Cocktail). The DNA-protein complexes were released with 250 µL of elution buffer (0.5 % (w/v) SDS, 0.1 M NaHCO<sub>3</sub>) by incubation at 65°C for 15 min with gentle agitation followed by incubation at room temperature for an additional 15 min with rotation. Samples were collected by centrifugation at 4 500 x g for 5 min at room temperature. The supernatant was removed and transferred into a new microfuge tube, and the elution step repeated. The two eluates were combined and 20 µL 5 M NaCl was added to the ChIP samples and the 30 µg input samples, followed by incubation at 65°C overnight to reverse the cross-links. The following day, protein digestion was performed by adding 10 µL of 0.5 M EDTA, 20 µL of 1 M Tris-HCl pH 6.5 and 1 µL of 10 mg mL<sup>-1</sup> Proteinase K (New England BioLabs) to each sample followed by incubation at 45°C for 2 h. DNA from immunoprecipitated and input chromatin was purified by phenol/chloroform extraction.
